# Supplementary material for: Short term association between ozone and mortality: global two stage time series study in 406 locations in 20 countries
Source: PubMed Central journal article supplement (PMC7190035; doi:10.1136/bmj.m108), 2020-02-10
Supplement: vica050789.ww1.pdf [file vica050789.ww1.pdf]

## Online-only Supplements

### Table of contents

- **eMethods 1.** Description of the data.
- **eMethods2.** Additional information on the statistical analysis.
  
- **eTable 1.** Complementary table with a description of other environmental data not included in Table 1.
- **eTable 2.** Description of the city-specific series.
- **eTable 3.** Overall and country-specific excess mortality fractions (% , 95% confidence interval) associated to ozone for the total (above 70  $\mu\text{g}/\text{m}^3$ ) and above specific thresholds consistent with current air quality standards (AQS).
- **eTable 4.** Overall and country-specific mortality fractions (and 95% confidence interval (CI)) associated to ozone between specific thresholds consistent with current AQS levels.
- **eTable 5.** Excess mortality associated to ozone for the total (above 70  $\mu\text{g}/\text{m}^3$ ) and above WHO guideline of 100  $\mu\text{g}/\text{m}^3$  in the 406 cities.
- **eTable 6.** Overall pooled estimates of ozone-mortality association (lag01) (95% confidence interval (CI)) expressed as relative risk (RR) per 10- $\mu\text{g}/\text{m}^3$  increase in ozone for each of the sensitivity analyses, except for the different approaches to control for temperature (reported in eFigure 3). Details on the analytical approach of each sub-analysis reported in eMethods 2.
  
- 
  
- **eFigure 1.** Overall and country-specific short-term ozone-mortality association, expressed as relative risk (RR) per 10-ppb increase in ozone (maximum 8-hour average) (lag 01).
- **eFigure 2.** Results from the additional analyses. Comparison of the concentration-response shapes using linear and non-linear functions (left) and lag-response association up to 30 days (right). q-AIC linear: 10376950, Q-AIC non-linear: 10379020.
- **eFigure 3.** Overall and country-specific short-term ozone-mortality association, expressed as relative risk (RR) per 10-unit increase in ozone (DLM lag 01), using different control for temperature detailed in eMethods 2. (Black, main model (qAIC: 10376950); red, approach 1 (qAIC: 10377749); green, approach 2 (qAIC: 10380318); blue, approach 3 (qAIC: 10389132); pink, approach 4 (qAIC: 10387640)).

## **eMethods 1 – Description of the MCC data**

Here we provide a detailed description of the mortality and environmental data used in the present study. As mentioned in the method section of the main manuscript, this data is included in a large dataset collected through the Multi-Country Multi-city (MCC) Collaborative Research Network (<http://mccstudy.lshtm.ac.uk/>). The dataset has been used in previous publications on temperature-related mortality and related topics (e.g. Gasparrini et al. 2015 Lancet) and a recent study on mortality associated to inhalable particles (Liu et al. 2019 NEJM). A detailed description of the air pollution data is provided in the latter. Below we describe for each country the specific data sources, the definition of the variables and the quality checks that were applied.

### *Selection of the study locations*

We initially included 434 locations available in the MCC database at the time of the study, with available data on daily mortality, mean temperature and ozone (computed as 8-hour maximum). The selection was restricted to cities or metropolitan areas included in the MCC dataset (i.e., regions or provinces were excluded). We then selected 423 that provided data for more than 3 years between 1985 and 2015. Note that for most of the cities, air pollutants were available during specific time intervals which might not be homogeneous within country and not consistent with the mortality and temperature data. The main study period reported in Table 1 is defined as the time between the earliest year and latest year for which ozone data was available in each city within country and by air pollutant. Then, an exploratory analysis of the ozone data was performed as a quality check. From the 423 locations initially selected, we excluded 6 locations (1 in Italy and 5 in the US) with a percentage of missing values above 75% in the 30-days moving average of ozone. We then excluded 6 locations for which the temporal patterns in daily ozone did not follow the expected seasonal trends for this air pollutant, for instance showing abrupt steps, potentially due to changes in the monitors (e.g. relocation, change in the device) or other technical problems. Finally, 5 locations were excluded (1 in Mexico, 1 in South Africa, and 3 in the US) where mortality series presented more than 50% of missing counts. We specify below the locations that were excluded and the reason for exclusion in each country. For each sensitivity analysis using other pollutants, additional exclusions were performed depending on data availability of each air pollutant and weather variable.

### *Characteristics of the air pollution data*

A unique daily series of each pollutant was derived from one or more monitoring stations of the national or regional network available in each city. When more than one monitor, an average daily measurement was derived. See information in each country on the number and characteristics of the monitor considered.

At the time of the data collection, countries provided air pollution levels in  $\mu\text{g}/\text{m}^3$  for nitrogen dioxide and inhalable particles (PM10, PM2.5), and for ozone in  $\mu\text{g}/\text{m}^3$ , ppm or ppb. Prior to data analysis, ozone series were harmonized in terms of units of measure to  $\mu\text{g}/\text{m}^3$ . The conversion factors used were:  $1 \text{ ppb} = 10^{-3} \text{ ppm} = 2 \mu\text{g}/\text{m}^3$ .

Refer to Table S1 for city-specific periods and descriptive summaries of the data.

### *Description of the data in each country*

#### Australia (3 cities, 2000-2009)

Daily mortality, gathered from the Australian Bureau of Statistics, is represented by counts of deaths due to non-external causes (ICD-9: 0-799; ICD-10: A00-R99). Mean daily temperature ( $^{\circ}\text{C}$ ) and relative humidity (%) were obtained from the Australian Bureau of Meteorology.

Hourly measurements of inhalable particulate matter with an aerodynamic diameter of 10 µm or less (PM<sub>10</sub>), inhalable particulate matter with an aerodynamic diameter of 2.5 µm or less (PM<sub>2.5</sub>) only between 2003 and 2009, nitrogen dioxide (NO<sub>2</sub>), and ozone (O<sub>3</sub>) were collected from urban monitoring stations run by local EPA. Daily PM<sub>10</sub>, PM<sub>2.5</sub> and NO<sub>2</sub> measurements were computed as 24-hour average and daily maximum 8-hour average for O<sub>3</sub>. In total, missing data amount for 0.0, 0.0, 1.4, 3.2, 8.3 and 4.0% of the mortality, mean temperature, relative humidity, O<sub>3</sub>, PM<sub>10</sub>, PM<sub>2.5</sub> and NO<sub>2</sub> series, respectively.

#### Canada (26 metropolitan areas, 1986-2011)

Daily mortality, obtained from Statistics Canada through access to the Canadian Mortality Database, is represented by counts of deaths for all causes. Mean daily temperature (in °C), computed as the 24-hour average based on hourly measurements, and relative humidity (%) were obtained from Environment Canada. A single weather station was selected for each city using the airport monitoring station located closest to the CMA center. Hourly measures of PM<sub>10</sub> available in 16 cities between 2000-2011, PM<sub>2.5</sub> in 25 cities between 2006 and 2011, NO<sub>2</sub> in 25 cities in 2007-2011, and measures of O<sub>3</sub> were collected from monitors located in urban areas of the National Air Pollution Surveillance (NAPS) network of Environment Canada, a government institution that operates ground monitoring stations across Canada. Daily PM<sub>10</sub>, PM<sub>2.5</sub> and NO<sub>2</sub> levels were computed as the 24-hour average and daily maximum 8-hour average for O<sub>3</sub> from hourly measurements in different stations, and then averaged across stations within the same CMA with no missing data, with an average of 4 stations per city. In total, missing data amount for 2.1, 1.0, 8.8, 4.1, 19.9, 7.1 and 7.2% of the mortality, mean temperature, relative humidity, O<sub>3</sub>, PM<sub>10</sub>, PM<sub>2.5</sub> and NO<sub>2</sub> series, respectively.

#### China (3 cities, 1996-2015 period)

Initially, we collected data from 4 Chinese cities from the Municipal Center for Disease Control. Daily mortality is represented by counts of deaths for non-external causes (ICD-9: 0-799; ICD-10: A00-R99). Each city had a different study period between 1996 and 2015, see in eTable2. Mean daily temperature (in °C), computed as the 24-hour average from hourly measurements, and relative humidity (%) were collected from the meteorological departments of each city. Measures of PM<sub>10</sub>, NO<sub>2</sub> and ozone O<sub>3</sub> were collected from urban monitoring stations run by China National Environmental Monitoring Center. Daily PM<sub>10</sub> and NO<sub>2</sub> levels were computed as the 24-hour mean and daily maximum 8-hour average for O<sub>3</sub> using hourly measurements. The analysis was restricted to 3 cities with a minimum of three years of data. PM<sub>10</sub> and NO<sub>2</sub> measurements were available between 2005 and 2015. In total, missing data amount for 17.8, 17.8, 11.1, 21.9, 18.3 and 18.1% of the mortality, mean temperature, relative humidity, O<sub>3</sub>, PM<sub>10</sub> and NO<sub>2</sub> series, respectively.

#### Czech Republic (1 city, 1994-2009)

Daily mortality is represented by counts of all-cause deaths obtained from the Czech Statistical Office and the Institute of Health Information and Statistics. Mean daily temperature (in °C) and relative humidity (%), computed as the average of observations in standard climatic terms (7:00, 14:00 and 21:00 local time) were collected by the Czech Hydrometeorological Institute. The average value was calculated according to formula  $(T_{07} + T_{14} + 2 \cdot T_{21})/4$ . Information about daily PM<sub>10</sub> and NO<sub>2</sub> levels computed as 24-hour average and maximum 8-hour average for O<sub>3</sub> were provided by the Czech Hydrometeorological Institute. The daily values were calculated from 4 stations (2 urban + 2 suburban). In total, missing data amount for 0.0, 0.0, 0.0, 0.1, 0.1 and 0.1% of the mortality, mean temperature, relative humidity, O<sub>3</sub>, PM<sub>10</sub> and NO<sub>2</sub> series, respectively.

#### Estonia (4 cities, 2002-2015)

Daily mortality is represented by counts of deaths for non-external causes (ICD-9: 0-799; ICD-10: A00-R99) obtained from Estonian Causes of Death Registry. Mean daily temperature (in °C) and relative humidity (%) were computed as the 24-h average of hourly measurements collected from Estonian Environment Agency. A single weather station located nearby the urban area was selected for each city. Hourly measurements PM<sub>10</sub>, PM<sub>2.5</sub>, NO<sub>2</sub> and O<sub>3</sub> were collected from urban background stations run by the Estonian Environmental Research Centre. Daily PM<sub>10</sub>, PM<sub>2.5</sub> and NO<sub>2</sub> levels were computed as 24-hour average and daily maximum 8-hour average for O<sub>3</sub>; for each pollutant, city average among monitoring stations was calculated. PM<sub>10</sub> and NO<sub>2</sub> measurements were available between 2009 and 2015 and PM<sub>2.5</sub> between 2010 and 2015. In total, missing data amount for 0.0, 0.0, 0.0, 5.1, 6.2, 7.7 and 7.8% of the mortality, mean temperature, relative humidity, O<sub>3</sub>, PM<sub>10</sub>, PM<sub>2.5</sub> and NO<sub>2</sub> series, respectively.

#### France (18 cities, 2000-2010)

Daily mortality, obtained from French National Institute of Health and Medical Research (CepiDC), is represented by counts of deaths for all causes. Mean daily temperature (in °C), computed as the mean of the minimal and maximal temperature, and relative humidity (%) was obtained from Meteo France. Hourly measurements of PM<sub>10</sub> and O<sub>3</sub> were collected through the French local air quality monitoring network (Associations Agréées de Surveillance de la Qualité de l'Air AASQA). For PM<sub>10</sub>, we used only urban stations, and for O<sub>3</sub>, urban and peri-urban stations. Daily PM<sub>10</sub> levels were computed as 24h average and daily maximum 8-hour average for O<sub>3</sub>. Measurements were obtained from multiple stations (with different numbers for each city). PM<sub>10</sub> measurements were available between 2001 and 2010. In total, missing data amount for 0.0, 0.1, 0.1, 0.1 and 1.8% of the mortality, mean temperature, relative humidity, O<sub>3</sub> and PM<sub>10</sub> series, respectively.

#### Germany (12 cities, 1993-2015)

Daily mortality, obtained from the Research Data Centres of the Federation and the Federal States of Germany (Forschungsdatenzentrum der Statistischen Ämter des Bundes und der Länder), is represented by counts of deaths for all causes. Mean daily temperature (in °C), computed as the 24-h average based on hourly measurements, was obtained from the Climate Data Centre of the German National Meteorological Service (Deutscher Wetterdienst). Where several weather stations existed within the city boundaries, stations closest to the city centre were chosen, provided that measurements were available for the whole study period. Hourly measurements of PM<sub>10</sub>, PM<sub>2.5</sub>, NO<sub>2</sub> and O<sub>3</sub> were collected through the German Environment Agency (Umweltbundesamt) from urban background stations. Daily PM<sub>10</sub>, PM<sub>2.5</sub> and NO<sub>2</sub> levels were computed as 24-hour average and daily maximum 8-hour average for O<sub>3</sub>. Measurements were obtained from multiple stations (with different numbers for each city). PM<sub>10</sub> measurements were available between 2003 and 2015, PM<sub>2.5</sub> between 2010 and 2015 only in 11 cities and NO<sub>2</sub> between 1994 and 2015. In total, missing data amount for 0.0, 0.0, 5.1, 4.3, 5.8 and 5.3% of the mortality, mean temperature, O<sub>3</sub>, PM<sub>10</sub>, PM<sub>2.5</sub> and NO<sub>2</sub> series, respectively.

#### Greece (1 city, 2001-2010)

Daily mortality is represented by counts of deaths for all causes (ICD-9: 0-799; ICD-10: A00-R99) collected by Hellenic Statistical Authority. Mean daily temperature (in °C) and relative humidity (%) were computed as the 24-h average based on hourly measurements collected from the National observatory of Athens (<http://www.noa.gr/>) from site "Thisio" located in the city of Athens. Hourly measurements PM<sub>10</sub>, PM<sub>2.5</sub>, NO<sub>2</sub> and ozone (O<sub>3</sub>) were obtained from the Ministry of Environment and Energy fixed site monitoring network. Urban or suburban fixed monitoring background or traffic sites with at least 75% complete information per year of the study period were selected. Daily PM<sub>10</sub>, PM<sub>2.5</sub> and NO<sub>2</sub> levels were computed as 24-hour

average and daily maximum 8-hour average for O<sub>3</sub>. PM<sub>2.5</sub> was only available between 2007 and 2010. In total, missing data amount for 0.0, 6.0, 5.9, 0.0, 1.5, 1.8, and 0.0% of the mortality, mean temperature, relative humidity, O<sub>3</sub>, PM<sub>10</sub>, PM<sub>2.5</sub> and NO<sub>2</sub> series, respectively.

#### Italy (9 cities, 2006-2015)

Data on 14 Italian cities were initially included, but only 9 cities were selected according to the selection criteria. Daily mortality, obtained from local mortality registries and from the rapid mortality surveillance system, is represented by counts of deaths for all causes (ICD-9: 0-799; ICD-10: A00-R99). Mean daily temperature (in °C) was computed as the 24-h average based on 6-h measurements obtained from the Meteorological Service of the Italian Air Force. A single weather station was selected for each city, using the airport monitoring station located closest to the city center. Hourly measurements of PM<sub>10</sub> and O<sub>3</sub> were obtained from the same period. Daily PM<sub>10</sub> levels were computed as 24h average and daily maximum 8-hour average for O<sub>3</sub>. In total, missing data amount for 0.0, 0.5, 1.7 and 1.7% of the mortality, mean temperature, O<sub>3</sub> and PM<sub>10</sub> series, respectively.

#### Japan (45 cities, 2011-2015)

Data was initially collected from each capital city of the 47 prefectures of Japan, but 2 locations with a short study period (less than 3 years) were excluded. Daily mortality, obtained from computerized death certificate data from the Ministry of Health, Labour and Welfare, Japan, is represented by counts of deaths for all causes. Mean daily temperature (in °C) and relative humidity (in %), computed as the 24-hour average based on hourly measurements, were obtained from the Japan Meteorological Agency. A single weather station located within the urban area of the capital city was selected for each prefecture. Hourly measurements of PM<sub>10</sub>, PM<sub>2.5</sub>, NO<sub>2</sub> and O<sub>3</sub> were collected from the urban monitors within the capital cities maintained by the Ministry of the Environment of Japan. Daily PM<sub>10</sub>, PM<sub>2.5</sub> and NO<sub>2</sub> levels were computed as 24-hour average and daily maximum 8-hour average for O<sub>3</sub>. PM<sub>10</sub> measurements were available between 2013 and 2015, and PM<sub>2.5</sub> between 2014 and 2015. In total, missing data amount for 0.0, 0.1, 0.1, 0.9, 3.1, 6.4, and 0.8% of the mortality, mean temperature, relative humidity, O<sub>3</sub>, PM<sub>10</sub>, and NO<sub>2</sub> series, respectively.

#### Mexico (7 cities, 2000-2012)

Daily mortality, obtained from National Institute of Statistics, Geography and Informatics, is represented by counts of deaths for all causes. Mean daily temperature (in °C) and relative humidity (%) were computed as the 24-hour average based on hourly measurements collected through the Servicio Meteorológico Nacional (SMN) and the Instituto Nacional de Ecología y Cambio Climático (INECC). Hourly measurements of PM<sub>10</sub>, PM<sub>2.5</sub> and O<sub>3</sub> were obtained from urban monitors of the local monitoring network. Daily PM<sub>10</sub> and PM<sub>2.5</sub> levels were computed as the 24-hour mean and daily maximum 8-hour average for O<sub>3</sub> from hourly measurements. Data from 9 cities were initially included, but 2 locations were eventually excluded due to poor quality of O<sub>3</sub> data. PM<sub>10</sub> measurements were available between 2010 and 2012, and PM<sub>2.5</sub> between 2011 and 2012 only in 5 cities. In total, missing data amount for 0.0, 17.3, 7.0 and 5.5% of the mortality, mean temperature, O<sub>3</sub> and PM<sub>10</sub> series, respectively.

#### Portugal (2 cities, 1997-2012)

Daily mortality, obtained from Statistics Portugal, is represented by counts of deaths for non-external causes only (ICD-9: 0-799; ICD-10: A00-R99). Mean daily temperature (in °C) was computed as the 24-hour average based on hourly measurements collected from the National Oceanic and Atmospheric Administration (NOAA). Hourly measurements of PM<sub>10</sub>, PM<sub>2.5</sub>, NO<sub>2</sub> and O<sub>3</sub> were gathered from the "online database of air quality" through Portuguese Environment Agency from urban monitors. Daily PM<sub>10</sub>, PM<sub>2.5</sub> and NO<sub>2</sub> levels were computed

as the 24-hour mean and daily maximum 8-hour average for O<sub>3</sub> from hourly measurements. PM<sub>10</sub> and NO<sub>2</sub> measurements were available between 1999 and 2012, and PM<sub>2.5</sub> between 2004 and 2012 only in 1 city. In total, missing data amount for 0.0, 0.1, 5.0, 4.8, 8.2 and 0.1% of the mortality, mean temperature, O<sub>3</sub>, PM<sub>10</sub>, PM<sub>2.5</sub> and NO<sub>2</sub> series, respectively.

#### South Korea (7 cities, 1999-2015)

Daily mortality was obtained from the Korea National Statistics Office, and is represented by counts of deaths for all causes. Mean daily temperature (in °C) and relative humidity (%) were computed as the 24-hour average based on hourly measurements. Measures of PM<sub>10</sub>, NO<sub>2</sub> and O<sub>3</sub> were available in the period 1999-2015 from monitors of the National Institute of Environmental Research. Daily PM<sub>10</sub> and NO<sub>2</sub> levels were computed as the 24-hour mean and daily maximum 8-hour average for O<sub>3</sub> from hourly measurements. In total, missing data amount for 0.9, 0.9, 0.9, 0.9, 1.4 and 0.9% of the mortality, mean temperature, relative humidity, O<sub>3</sub>, PM<sub>10</sub> and NO<sub>2</sub> series, respectively.

#### South Africa (5 cities, 2004-2013)

Daily mortality, provided by Statistics South Africa, is represented by counts of all recorded deaths from all causes at the level of the district municipality. Mean daily temperature (in °C) was computed as the average between daily minimum and maximum collected from the Agricultural Research Council of South Africa and the National Oceanic and Atmospheric Administration (NOAA). Hourly measurements of PM<sub>10</sub> and O<sub>3</sub> were collected at sites managed by the Department of Environmental Affairs (DEA) run by South African Weather Service (SAWS), the eThekweni Municipality, The City of Johannesburg, Sasol, and ESKOM. The eThekweni sites are within the coastal city of Durban on the Indian Ocean. The other sites are in the urban and industrial highveld region of South Africa. The monitoring sites in the industrial highveld include a range of site characteristics, including regional background, traffic, urban, power plant plume, industrial, residential, and low-income residential sites. Daily PM<sub>10</sub> levels were computed as the 24-hour mean, and daily maximum 8-hour running average for O<sub>3</sub> from the respective provided hourly measurements. The average 24-hour mean or daily maximum 8-hour running average values per district municipality (DM) were then calculated from all sites within each DM. All air quality data, except for the ESKOM run stations, were accessed through SAAQIS (<http://www.saaqis.org.za/>), which is run and hosted by SAWS. Data from 6 cities in South Africa were initially included, but 1 location was eventually excluded due to the poor quality of the ozone data. In total, 7.3%, 14.4% and 10.1% of the mortality, mean temperature, O<sub>3</sub> and PM<sub>10</sub> series was missing, respectively. We thank the Statistics South Africa for providing the mortality data, the Agricultural Research Council for providing the meteorological data, and DEA, SAAQIS, SAWS as well as all the data providers (ESKOM, Sasol, City of Johannesburg, and the eThekweni Municipality) for providing the air pollution data. Statistics South Africa had no had no role in the study design, data analysis or interpretation.

#### Spain (48 cities, 2004-2014)

Data was collected from the 48 capital cities of each province in Spain. Daily mortality, obtained from Spain National Institute of Statistics, is represented by counts of deaths for non-external causes (ICD-9: 0-799; ICD-10: A00-R99). Mean daily temperature (in °C), computed as the 24-hour average based on hourly measurements, and was obtained from weather stations of the Spain National Meteorology Agency. A single weather station, located within the urban area or at the near airport, was selected for each city. Hourly measurements of PM<sub>10</sub>, PM<sub>2.5</sub>, NO<sub>2</sub> and O<sub>3</sub> were collected from the free national repository (Magrama) from urban and suburban monitors. Daily PM<sub>10</sub>, PM<sub>2.5</sub> and NO<sub>2</sub> levels were computed as 24-hour average (only for 43, 20 and 45 cities, respectively) and daily maximum 8-hour average for

O<sub>3</sub>, PM<sub>10</sub> and NO<sub>2</sub> were collected between 2010 and 2014, and PM<sub>2.5</sub> between 2013 and 2014. In total, missing data amount for 0.0, 0.5, 5.9, 9.7, 11.8 and 6.7% of the mortality, mean temperature, O<sub>3</sub>, PM<sub>10</sub>, PM<sub>2.5</sub> and NO<sub>2</sub> series, respectively.

#### Sweden (1 city, 1990-2010)

Daily mortality, obtained from the Swedish Cause of Death Register at the Swedish National Board of Health and Welfare, is represented by counts of deaths for all causes. Mean daily temperature (in °C) and relative humidity (%), computed as the 24-hour average based on hourly measurements, were obtained from the Environment and Health Administration. A single weather station, located at Torkel Knutssongatan in Central Stockholm, was selected. Hourly measurements of PM<sub>10</sub>, PM<sub>2.5</sub>, NO<sub>2</sub> and O<sub>3</sub> were collected from the main urban background monitor run by the local monitoring network. Daily PM<sub>10</sub>, PM<sub>2.5</sub> and NO<sub>2</sub> levels were computed as the 24-hour average and for O<sub>3</sub> as 8-hour maximum. PM<sub>10</sub> and PM<sub>2.5</sub> were collected between 1993 and 2014, and 2001 and 2010, respectively. In total, missing data amount for 0.0, 0.2, 0.3, 4.2, 9.9, 9.3 and 0.1% of the mortality, mean temperature, O<sub>3</sub>, PM<sub>10</sub> and NO<sub>2</sub> series, respectively.

#### Switzerland (8 cities, 1995-2013)

Data on the 8 cities in Switzerland was collected. We extended the catching area of Lugano to the small municipalities around the main city with similar altitude. Daily mortality, provided by the Federal Office of Statistics (Switzerland), is represented by counts of non-external deaths other than accidents (ICD-10codes A00-R99, V01-V99, W00-X59). Mean daily temperature (in °C) and relative humidity (%), computed as the 24-hour average based on hourly measurements, were obtained from the IDAWEB database (a service provided by MeteoSwiss, the Swiss Federal Office of Meteorology and Climatology). A single weather station located within or near the urban area was selected for each city. Hourly measurements of PM<sub>10</sub>, PM<sub>2.5</sub>, NO<sub>2</sub> and O<sub>3</sub> were provided by the Immissionsdatenbank Luft (IDB, Federal Office of the Environment, Bern, Switzerland). Daily PM<sub>10</sub>, PM<sub>2.5</sub> and NO<sub>2</sub> levels were computed as the 24-hour average from urban monitoring stations, and as 8h-maximum for O<sub>3</sub> from urban and sub-urban monitoring stations. PM<sub>10</sub> and PM<sub>2.5</sub> were collected between 2003 and 2013. In total, missing data amount for 0.0, 0.0, 0.0, 4.8, 1.8, 6.9 and 0.5% of the mortality, mean temperature, relative humidity, O<sub>3</sub>, PM<sub>10</sub>, PM<sub>2.5</sub> and NO<sub>2</sub> series, respectively.

#### Taiwan (3 cities, 2008-2014)

Daily mortality, obtained from the Department of Health in Taiwan, is represented by counts of deaths for all causes. Mean daily temperature (in °C) and relative humidity (%) were computed as the 24-hour average based on hourly measurements. Hourly measurements of PM<sub>10</sub>, PM<sub>2.5</sub>, NO<sub>2</sub> and O<sub>3</sub> were obtained from urban monitors of the local monitoring network. Daily PM<sub>10</sub>, PM<sub>2.5</sub> and NO<sub>2</sub> levels were computed as the 24-hour average and for O<sub>3</sub> as 8-hour maximum. Data were pooled from 1 meteorological station and 11 air quality monitoring stations in Kaohsiung, 2 meteorological station and 5 air quality monitoring stations in Taichung, and 3 meteorological station and 15 air quality monitoring stations in Taipei. In total, missing data amount for 0.0, 0.0, 0.0, 0.0, 0.0, 0.1 and 0.0% of the mortality, mean temperature, relative humidity, O<sub>3</sub>, PM<sub>10</sub>, PM<sub>2.5</sub> and NO<sub>2</sub> series, respectively.

#### United Kingdom (15 conurbations, 1993-2006)

Daily mortality, gathered from Office for National Statistics, is represented by counts of deaths for all causes. Mean daily temperature (in °C) and relative humidity (in %) were obtained from the Meteorological Department obtained from British Atmospheric Data Centre. Series for each city daily mean temperatures were similarly constructed from all meteorological stations providing data for at least 75% of days. All data on air pollution levels were downloaded from

the UK Air Quality Archive, which reports results from the network of monitoring stations operated by the UK government. Hourly measurements of PM<sub>10</sub> and O<sub>3</sub> were available in the same period from urban and sub-urban monitoring stations. Daily PM<sub>10</sub> levels were computed as the 24-hour average from urban monitoring stations, and as 8-hour-maximum for O<sub>3</sub>. In total, missing data amount for 0.0, 0.0, 13.6, 7.3 and 7.9% of the mortality, mean temperature, relative humidity, O<sub>3</sub> and PM<sub>10</sub> series, respectively.

#### United States (188 cities, 1985-2006)

Daily mortality is represented by counts of deaths for all causes. Mean daily temperature (in °C) and relative humidity (%), computed as the 24-hour average based on hourly measurements, were obtained from the National Climatic Data Center (NCDC) of the National Oceanic and Atmospheric Administration (NOAA). Hourly measurements of PM<sub>10</sub>, PM<sub>2.5</sub>, NO<sub>2</sub> and O<sub>3</sub> were gathered from the U.S. Environmental Protection Agency (EPA) Air Quality System (AQS), from urban and sub-urban monitoring stations. Daily PM<sub>10</sub>, PM<sub>2.5</sub> and NO<sub>2</sub> levels were computed as the 24-hour average from urban monitoring stations (only for 176 and 137 cities), and as 8-hour-maximum for O<sub>3</sub> from monitors located in the county or set of contiguous counties in which the city is located. 91 out the 182 US cities registered daily O<sub>3</sub> levels only during the summer period. Data from 205 cities were initially collected, but 8 locations with a short study period (less than 3 years) were excluded, along with other 9 locations with a poor quality of O<sub>3</sub> data. PM<sub>10</sub> and PM<sub>2.5</sub> were collected between 2005 and 2006, and 2004 and 2006, respectively. In total, missing data amount for 0.8, 0.8, 5.2, 23.4, 64.7, 41.2 and 14.5% of the mortality, mean temperature, relative humidity, O<sub>3</sub>, PM<sub>10</sub>, PM<sub>2.5</sub> and NO<sub>2</sub> series, respectively.



## **eMethods 2. Additional information on the statistical analysis**

### Control for temperature in the main model

We control for temperature with distributed lag non-linear model (DLNM) of mean daily temperature. According to a previous study of MCC collaborative network (Gasparrini et al. Lancet 2015), the non-linear and delayed temperature-mortality association was modelled through a quadratic b-spline with internal knots in the 10<sup>th</sup>, 75<sup>th</sup>, 90<sup>th</sup> percentiles in the exposure-response dimension, and natural spline with 3 equally-spaced internal knots in the log scale of the lag dimension, up to 21 days of lag.

### Description of the additional analysis

Here we provide a detailed description of specific features of the additional analyses.

As described in the main manuscript, we explored potential non-linearity and delayed associations between ozone and mortality. The modelling choices selected (specifications of modelling function of ozone) for each sub-analysis were chosen based on q-AIC among different combinations of smoothing functions and placement and number of knots for the exposure-response and lag dimension, respectively.

- Modelling choices for the non-linear concentration-response function: natural cubic spline and quadratic b-spline with 1 or 2 internal knots placed in 50 and 60  $\mu\text{g}/\text{m}^3$ .
- Modelling choices for the lag-association function: natural cubic spline with 1, 2 or 3 internal knots placed equally-spaced in the natural or log scale of the lag dimension up to 30 days.

City-specific non-linear exposure-response associations and lag-response associations obtained in these two additional analyses were pooled following the same method described in the main manuscript for the final model. More details on this methodology can be found in Gasparrini et al. 2013 BMC Med Res Methodol.

### Description of the sensitivity analyses

*Different control for time trends:* natural spline with 4 and 10 degrees of freedom per year.

*Control for  $PM_{10}$ ,  $PM_{2.5}$  and  $NO_2$ :* air pollutants were included one by one in the main model as linear unconstrained distributed-lag linear models (DLMs) for the same and previous day of the exposure (lags 0 and 1).

*Control for relative humidity:* we controlled for relative humidity in the model as a linear term of lag0.

*Modelling approaches used to control for temperature:*

- Main model: quadratic b-spline with internal knots in the 10<sup>th</sup>, 75<sup>th</sup>, 90<sup>th</sup> percentiles in the exposure-response dimension, and natural spline with 3 equally-spaced internal knots in the log scale of the lag dimension, up to 21 days of lag.
- Approach 1: quadratic b-spline with internal knots in the 10<sup>th</sup>, 75<sup>th</sup>, 90<sup>th</sup> percentiles in the exposure-response dimension, and natural spline with 3 equally-spaced internal knots in the log scale of the lag dimension, up to 13 days of lag.
- Approach 2: quadratic b-spline with 3 internal knots equally-spaced quantiles in the exposure-response dimension, and natural spline with 1 internal knot equally-spaced in the log scale of the lag dimension, up to 13 days of lag.
- Approach 3: natural cubic spline with 3 degrees of freedom of the moving average lag013.
- Approach 4: natural cubic spline with 3 degrees of freedom of the moving average lag03.

## References

Gasparrini A, Guo Y, Hashizume M, Lavigne E, Zanobetti A, Schwartz J, Tobias A, Tong S, Rocklöv J, Forsberg B, Leone M, De Sario M, Bell ML, Guo YL, Wu CF, Kan H, Yi SM, de Sousa Zanotti Stagliorio Coelho M, Saldiva PH, Honda Y, Kim H, Armstrong B. Mortality risk attributable to high and low ambient temperature: a multicountry observational study. *Lancet*. 2015 Jul 25;386(9991):369-75. doi: 10.1016/S0140-6736(14)62114-0.

Gasparrini A, Armstrong B. Reducing and meta-analysing estimates from distributed lag non-linear models. *BMC Med Res Methodol*. 2013 Jan 9;13:1. doi: 10.1186/1471-2288-13-1.

Liu C, Chen R, Sera F, Vicedo-Cabrera AM, Guo Y, Tong S, Coelho MSZS, Saldiva PHN, Lavigne E, Matus P, Valdes Ortega N, Osorio Garcia S, Pascal M, Stafoggia M, Scortichini M, Hashizume M, Honda Y, Hurtado-Díaz M, Cruz J, Nunes B, Teixeira JP, Kim H, Tobias A, Íñiguez C, Forsberg B, Åström C, Ragettli MS, Guo YL, Chen BY, Bell ML, Wright CY, Scovronick N, Garland RM, Milojevic A, Kyselý J, Urban A, Orru H, Indermitte E, Jaakkola JJK, Rytí NRI, Katsouyanni K, Analitis A, Zanobetti A, Schwartz J, Chen J, Wu T, Cohen A, Gasparrini A, Kan H. Ambient Particulate Air Pollution and Daily Mortality in 652 Cities. *N Engl J Med*. 2019.

**eTable 1.** Complementary table with a description of other environmental data not included in Table 1.

|                       | <b>PM<sub>10</sub></b><br><b>(Median [IQR])</b> | <b>PM<sub>2.5</sub></b><br><b>(Median [IQR])</b> | <b>NO<sub>2</sub></b><br><b>(Median [IQR])</b> | <b>Relative humidity</b><br><b>(Median [IQR])</b> |
|-----------------------|-------------------------------------------------|--------------------------------------------------|------------------------------------------------|---------------------------------------------------|
| <i>Australia</i>      | 18.2 [14.5; 23.2]                               | 6.0 [4.3; 8.4]                                   | 21.4 [14.1; 27.9]                              | 70.1 [62.6; 77.1]                                 |
| <i>Canada</i>         | 12.0 [7.6; 20.3]                                | 7.3 [4.7; 11.5]                                  | 13.9 [9.5; 19.4]                               | 73.7 [64.7; 82.3]                                 |
| <i>China</i>          | 66.7 [46.5; 97.2]                               | --                                               | 37.6 [28.0; 50.5]                              | 76.7 [69.1; 83.6]                                 |
| <i>Czech Republic</i> | 29.4 [19.9; 44.7]                               | --                                               | 30.8 [24.2; 38.7]                              | 78.0 [68.0; 86.0]                                 |
| <i>Estonia</i>        | 14.4 [9.3; 21.8]                                | 7.4 [4.3; 11.8]                                  | 11.4 [7.6; 16.7]                               | 84.2 [74.8; 91.2]                                 |
| <i>France</i>         | 18.7 [13.9; 25.1]                               | --                                               | --                                             | 76.2 [67.5; 84.1]                                 |
| <i>Germany</i>        | 20.1 [14.3; 28.7]                               | 12.1 [8.1; 18.3]                                 | 29.6 [21.8; 38.4]                              | --                                                |
| <i>Greece</i>         | 39.5 [29.5; 53.1]                               | --                                               | 50.2 [39.6; 61.6]                              | 66.0 [54.0; 75.4]                                 |
| <i>Italy</i>          | 28.2 [21.0; 40.6]                               | --                                               | --                                             | --                                                |
| <i>Japan</i>          | 16.8 [11.7; 23.9]                               | 12.6 [8.4; 18.3]                                 | 17.5 [12.7; 24.4]                              | 69.6 [60.6; 77.7]                                 |
| <i>Mexico</i>         | 53.4 [38.5; 72.7]                               | 25.6 [19.0; 33.1]                                | --                                             | 60.8 [50.0; 71.1]                                 |
| <i>Portugal</i>       | 27.2 [18.5; 40.8]                               | 11.0 [7.1; 18.0]                                 | 26.9 [17.2; 39.0]                              | --                                                |
| <i>South Africa</i>   | 48.1 [31.4; 73.1]                               | 27.0 [18.2; 39.6]                                | --                                             | --                                                |
| <i>South Korea</i>    | 46.0 [33.3; 63.0]                               | --                                               | 44.5 [33.6; 58.5]                              | 65.0 [52.3; 75.6]                                 |
| <i>Spain</i>          | 25.2 [19.2; 32.7]                               | 11.5 [8.1; 16.2]                                 | 26.4 [20.2; 34.0]                              | --                                                |
| <i>Sweden</i>         | 12.5 [9.3; 17.9]                                | 6.6 [4.7; 9.5]                                   | 26.8 [20.0; 34.8]                              | 79.6 [68.4; 87.6]                                 |
| <i>Switzerland</i>    | 21.0 [13.9; 31.1]                               | 16.0 [10.4; 24.6]                                | 32.0 [23.8; 41.8]                              | 75.5 [66.4; 83.3]                                 |
| <i>Taiwan</i>         | 54.6 [37.5; 74.1]                               | 32.0 [20.5; 43.8]                                | 35.9 [27.6; 45.6]                              | 75.3 [70.5; 79.8]                                 |
| <i>UK</i>             | 23.3 [18.0; 31.5]                               | --                                               | --                                             | 74.2 [64.2; 83.3]                                 |
| <i>USA</i>            | 25.9 [17.9; 36.7]                               | 11.6 [7.6; 17.2]                                 | 31.7 [23.0; 42.4]                              | 66.5 [56.5; 76.6]                                 |

PM<sub>10</sub>: inhalable particulate matter with an aerodynamic diameter of 10 µm or less, µg/m<sup>3</sup>. PM<sub>2.5</sub>: inhalable particulate matter with an aerodynamic diameter of 2.5 µm or less, µg/m<sup>3</sup>. NO<sub>2</sub>: nitrogen dioxide, µg/m<sup>3</sup>. IQR: interquartile range. Relative humidity, in %. Detailed description of the data provided in eMethods 1. City-specific descriptive summaries reported in eTable 2.

**eTable 2.** Description of city-specific series.

| City               | Country   | Period    | N deaths | Ozone ( $\mu\text{g}/\text{m}^3$ )<br>Median [IQR] | PM <sub>10</sub> ( $\mu\text{g}/\text{m}^3$ )<br>Median [IQR] | PM <sub>2.5</sub> ( $\mu\text{g}/\text{m}^3$ )<br>Median [IQR] | NO <sub>2</sub> ( $\mu\text{g}/\text{m}^3$ )<br>Median [IQR] | Mean<br>temperature (°C)<br>Median [IQR] | Relative<br>humidity (%)<br>Median [IQR] |
|--------------------|-----------|-----------|----------|----------------------------------------------------|---------------------------------------------------------------|----------------------------------------------------------------|--------------------------------------------------------------|------------------------------------------|------------------------------------------|
| Brisbane           | Australia | 2000-2009 | 89299    | 35.1 [29.0; 41.6]                                  | 17.2 [14.6; 20.5]                                             | 5.6 [4.3; 7.3]                                                 | 12.9 [9.5; 17.9]                                             | 20.8 [17.1; 23.5]                        | 69.5 [63.8; 75.2]                        |
| Melbourne          | Australia | 2000-2009 | 196355   | 31.2 [23.8; 38.9]                                  | 17.5 [13.6; 23.3]                                             | 6.3 [4.6; 8.9]                                                 | 24.6 [16.4; 30.8]                                            | 15.5 [12.3; 19.1]                        | 69.7 [62.0; 77.3]                        |
| Sydney             | Australia | 2000-2009 | 227873   | 27.4 [19.6; 35.3]                                  | 19.8 [15.2; 25.8]                                             | 6.1 [4.1; 9.0]                                                 | 26.7 [16.4; 34.9]                                            | 18.8 [15.1; 21.9]                        | 71.1 [62.0; 78.7]                        |
| Abbotsford         | Canada    | 1986-2011 | 27098    | 66.6 [49.0; 80.4]                                  | 11.6 [8.3; 16.5]                                              | 5.1 [3.4; 7.2]                                                 | 12.3 [9.1; 15.6]                                             | 10.5 [6.2; 15.7]                         | 76.2 [68.4; 84.3]                        |
| Calgary            | Canada    | 1986-2011 | 132883   | 76.4 [62.7; 92.6]                                  | 20.6 [13.8; 29.7]                                             | 8.4 [5.4; 12.3]                                                | 21.7 [16.2; 28.7]                                            | 5.6 [-1.8; 12.9]                         | 62.0 [50.8; 73.5]                        |
| Edmonton           | Canada    | 1986-2011 | 154899   | 72.5 [54.9; 92.1]                                  | 17.6 [11.4; 26.9]                                             | 7.5 [4.8; 12.2]                                                | 19.1 [13.4; 26.8]                                            | 5.4 [-3.5; 13.9]                         | 69.9 [61.7; 78.1]                        |
| Halifax            | Canada    | 1986-2011 | 71264    | 60.8 [49.0; 74.5]                                  | NA                                                            | 7.1 [4.8; 9.9]                                                 | 14.7 [10.8; 19.3]                                            | 7.1 [-0.4; 14.9]                         | 79.7 [69.5; 88.9]                        |
| Hamilton           | Canada    | 1986-2011 | 113876   | 72.5 [54.9; 98.0]                                  | 27.2 [18.5; 38.7]                                             | 9.0 [5.6; 14.3]                                                | 17.6 [12.7; 23.0]                                            | 8.3 [0; 17.2]                            | 73.2 [64.4; 81.7]                        |
| Kingston           | Canada    | 1988-2011 | 36438    | 70.6 [54.9; 92.1]                                  | NA                                                            | 6.8 [4.3; 11.1]                                                | 4.3 [3.1; 6.1]                                               | 8.1 [-0.2; 17]                           | 70.6 [61.4; 79.2]                        |
| Kitchener-Waterloo | Canada    | 1986-2011 | 71387    | 72.5 [54.9; 96.0]                                  | NA                                                            | 7.5 [4.4; 12.9]                                                | 12.0 [7.5; 18.8]                                             | 7.4 [-1; 16.2]                           | 72.2 [63.3; 80.2]                        |
| London Ontario     | Canada    | 1986-2011 | 96799    | 68.6 [51.0; 96.0]                                  | 15.8 [11.2; 23.4]                                             | 8.4 [5.2; 13.2]                                                | 15.4 [9.7; 21.7]                                             | 8.7 [0; 17.3]                            | 75.8 [68.3; 82.9]                        |
| Montreal           | Canada    | 1986-2009 | 255272   | 78.4 [58.8; 98.0]                                  | 20.5 [15.3; 28.2]                                             | 8.3 [5.3; 13.6]                                                | 17.5 [12.8; 23.0]                                            | 7.7 [-2.1; 17.1]                         | 70.2 [61.4; 78.6]                        |
| Niagara            | Canada    | 1988-1996 | 31770    | 74.5 [54.9; 105.8]                                 | NA                                                            | NA                                                             | NA                                                           | 8.9 [1.1; 17.9]                          | 78.3 [70.8; 86.3]                        |
| Oakville           | Canada    | 1986-2011 | 58991    | 72.5 [54.9; 96.0]                                  | NA                                                            | 7.0 [4.3; 11.4]                                                | 14.6 [9.8; 20.0]                                             | 8.7 [0.9; 17.5]                          | 69.5 [61.4; 78.5]                        |
| Oshawa             | Canada    | 1986-2011 | 72386    | 70.6 [54.9; 88.2]                                  | NA                                                            | 7.2 [4.3; 12.2]                                                | 15.3 [8.8; 23.1]                                             | 7.9 [0; 16.6]                            | NA                                       |
| Ottawa             | Canada    | 1986-2011 | 136955   | 66.6 [51.0; 84.3]                                  | NA                                                            | 6.0 [3.5; 10.2]                                                | 16.0 [8.9; 23.3]                                             | 7.6 [-2.5; 17.1]                         | 71.0 [61.5; 80.6]                        |
| Regina             | Canada    | 1986-2011 | 49530    | 52.9 [39.2; 68.6]                                  | 19.4 [11.9; 29.4]                                             | 6.7 [4.4; 9.6]                                                 | 12.5 [9.0; 17.4]                                             | 4.7 [-6.4; 14.5]                         | 72.3 [61.4; 82.4]                        |
| Sarnia             | Canada    | 1986-2011 | 28656    | 76.4 [60.8; 100.0]                                 | 16.8 [10.5; 24.6]                                             | 11.5 [7.5; 17.7]                                               | 13.3 [8.7; 19.6]                                             | 9.1 [0.7; 17.8]                          | 77.2 [69.4; 84.3]                        |
| Sudbury            | Canada    | 1986-2011 | 40907    | 70.6 [58.8; 88.2]                                  | NA                                                            | 4.0 [2.4; 6.8]                                                 | 7.9 [5.0; 11.7]                                              | 5.1 [-5; 15.1]                           | 73.0 [62.3; 83.1]                        |
| Saint John NB      | Canada    | 1986-2011 | 44302    | 72.5 [58.8; 86.2]                                  | 12.5 [8.3; 18.8]                                              | 5.7 [3.5; 9.0]                                                 | 6.4 [3.7; 10.4]                                              | 6.2 [-1.7; 13.7]                         | 76.5 [66.3; 86.1]                        |
| St John's NFL      | Canada    | 1989-2011 | 48656    | 62.7 [51.0; 72.5]                                  | NA                                                            | 4.4 [2.9; 6.4]                                                 | 7.5 [4.4; 12.1]                                              | 5.1 [-1.1; 12.1]                         | 83.5 [75.0; 90.8]                        |
| Sault Ste Marie    | Canada    | 1986-2011 | 28838    | 68.6 [56.8; 84.3]                                  | 13.8 [9.2; 22.1]                                              | 5.3 [2.9; 9.2]                                                 | 8.3 [4.3; 13.8]                                              | 5.7 [-3; 14.7]                           | 78.5 [71.0; 85.2]                        |
| Saskatoon          | Canada    | 1986-2011 | 56891    | 56.8 [43.1; 72.5]                                  | NA                                                            | 5.2 [3.4; 7.8]                                                 | 11.5 [8.0; 16.0]                                             | 4.4 [-7; 14.1]                           | 73.0 [62.5; 82.5]                        |

| City             | Country        | Period    | N deaths | Ozone ( $\mu\text{g}/\text{m}^3$ )<br>Median [IQR] | PM <sub>10</sub> ( $\mu\text{g}/\text{m}^3$ )<br>Median [IQR] | PM <sub>2.5</sub> ( $\mu\text{g}/\text{m}^3$ )<br>Median [IQR] | NO <sub>2</sub> ( $\mu\text{g}/\text{m}^3$ )<br>Median [IQR] | Mean<br>temperature ( $^{\circ}\text{C}$ )<br>Median [IQR] | Relative<br>humidity (%)<br>Median [IQR] |
|------------------|----------------|-----------|----------|----------------------------------------------------|---------------------------------------------------------------|----------------------------------------------------------------|--------------------------------------------------------------|------------------------------------------------------------|------------------------------------------|
| Thunder Bay      | Canada         | 1986-2011 | 35663    | 64.7 [52.9; 78.4]                                  | 11.7 [7.8; 14.1]                                              | 4.9 [3.0; 7.8]                                                 | 10.0 [6.3; 14.9]                                             | 4.2 [-5.7; 13.4]                                           | 74.4 [64.8; 82.6]                        |
| Toronto          | Canada         | 1986-2011 | 673074   | 84.3 [66.6; 109.8]                                 | 18.2 [13.6; 25.0]                                             | 8.1 [5.1; 13.0]                                                | 21.5 [16.2; 27.1]                                            | 8.8 [0.5; 17.7]                                            | 71.8 [63.7; 79.5]                        |
| Victoria         | Canada         | 1986-2011 | 84747    | 62.7 [49.0; 78.4]                                  | 12.1 [9.2; 16.1]                                              | 5.7 [3.9; 8.4]                                                 | 9.7 [6.3; 14.1]                                              | 9.9 [6.3; 14.5]                                            | 78.2 [70.0; 86.0]                        |
| Vancouver        | Canada         | 1986-2011 | 329577   | 70.6 [60.8; 84.3]                                  | 11.6 [8.6; 15.5]                                              | 5.5 [3.8; 7.7]                                                 | 16.9 [13.7; 20.6]                                            | 10.2 [6.2; 15.4]                                           | 79.3 [72.3; 86.5]                        |
| Windsor          | Canada         | 1986-2011 | 65259    | 70.6 [47.0; 101.9]                                 | 21.0 [15.3; 29.7]                                             | 9.5 [5.8; 14.5]                                                | 20.4 [14.6; 27.1]                                            | 10.4 [1.6; 19.3]                                           | 70.6 [62.5; 79.2]                        |
| Winnipeg         | Canada         | 1986-2011 | 168512   | 62.7 [51.0; 80.4]                                  | 12.0 [7.6; 20.3]                                              | 6.4 [4.3; 9.2]                                                 | 11.8 [7.9; 17.1]                                             | 4.8 [-7.4; 15.5]                                           | 73.1 [64.2; 82.2]                        |
| Hong Kong        | China          | 1996-2002 | 215242   | 31.4 [19.0; 50.6]                                  | 45.4 [31.7; 66.5]                                             | NA                                                             | 14.7 [9.6; 22.2]                                             | 24.7 [19.8; 27.8]                                          | 79.0 [74.0; 84.0]                        |
| Shanghai         | China          | 2001-2015 | 515429   | 68.2 [42.8; 100.2]                                 | 75.0 [51.8; 114.1]                                            | NA                                                             | 53.0 [39.3; 71.2]                                            | 18.3 [10; 24.4]                                            | 73.0 [64.4; 80.8]                        |
| Suzhou           | China          | 2005-2008 | 49984    | 48.3 [21.6; 81.7]                                  | 79.6 [56.0; 111.0]                                            | NA                                                             | 45.0 [35.0; 58.0]                                            | 18.3 [9.2; 24.9]                                           | 78.0 [69.0; 86.0]                        |
| Prague           | Czech Republic | 1994-2009 | 214062   | 69.3 [47.4; 95.0]                                  | 29.4 [19.9; 44.7]                                             | NA                                                             | 30.8 [24.2; 38.7]                                            | 9.2 [2.5; 15.3]                                            | 78.0 [68.0; 86.0]                        |
| Kohtla-Jarve     | Estonia        | 2002-2015 | 12199    | 55.0 [43.7; 67.4]                                  | 12.4 [8.1; 19.2]                                              | 5.0 [2.6; 8.3]                                                 | 5.1 [3.3; 8.0]                                               | 5.6 [-0.4; 13.3]                                           | 84.0 [74.0; 91.0]                        |
| Narva linn       | Estonia        | 2009-2015 | 5993     | 50.6 [38.6; 64.0]                                  | 12.9 [8.7; 18.5]                                              | 7.1 [4.4; 10.9]                                                | 9.0 [6.3; 13.7]                                              | 5.5 [-0.4; 13.3]                                           | 85.0 [75.0; 92.0]                        |
| Tallinn          | Estonia        | 2005-2015 | 52878    | 42.5 [30.7; 54.5]                                  | 17.3 [10.3; 27.6]                                             | NA                                                             | 21.1 [13.6; 29.7]                                            | 6.4 [0.7; 13.7]                                            | 84.0 [74.0; 91.0]                        |
| Tartu linn       | Estonia        | 2008-2015 | 8973     | 47.5 [33.9; 61.2]                                  | 14.8 [10.1; 21.8]                                             | 7.8 [4.3; 12.7]                                                | 10.4 [7.2; 15.4]                                             | 6.6 [0.8; 14]                                              | 84.0 [76.0; 91.0]                        |
| Bordeaux         | France         | 2000-2010 | 53219    | 67.4 [47.5; 87.2]                                  | 17.9 [13.8; 23.8]                                             | NA                                                             | NA                                                           | 13.8 [9.2; 18.7]                                           | 77.0 [68.0; 85.0]                        |
| Clermont Ferrand | France         | 2000-2010 | 19040    | 73.3 [54.4; 91.3]                                  | 16.8 [12.1; 23.2]                                             | NA                                                             | NA                                                           | 12.3 [6.8; 17.6]                                           | 72.0 [65.0; 80.0]                        |
| Dijon            | France         | 2000-2010 | 18786    | 66.3 [44.4; 87.5]                                  | 17.2 [12.3; 23.5]                                             | NA                                                             | NA                                                           | 11.6 [5.6; 17.1]                                           | 79.0 [69.0; 87.0]                        |
| Grenoble         | France         | 2000-2010 | 32738    | 66.1 [35.1; 92.8]                                  | 19.4 [13.2; 27.3]                                             | NA                                                             | NA                                                           | 12.7 [5.8; 18.4]                                           | 78.0 [70.0; 85.0]                        |
| Le Havre         | France         | 2000-2010 | 24323    | 67.3 [53.7; 80.0]                                  | 17.5 [14.0; 23.0]                                             | NA                                                             | NA                                                           | 11.6 [7.7; 15.9]                                           | 82.0 [75.0; 88.0]                        |
| Lille            | France         | 2000-2010 | 90900    | 57.6 [38.1; 74.9]                                  | 19.0 [14.5; 25.2]                                             | NA                                                             | NA                                                           | 11.3 [6.4; 16]                                             | 81.0 [73.0; 88.0]                        |
| Lens-Douai       | France         | 2000-2010 | 36686    | 57.7 [39.1; 75.0]                                  | 18.0 [13.5; 24.5]                                             | NA                                                             | NA                                                           | 11.3 [6.4; 16]                                             | 81.0 [73.0; 88.0]                        |
| Lyon             | France         | 2000-2010 | 77106    | 66.6 [40.0; 91.0]                                  | 19.0 [13.8; 26.5]                                             | NA                                                             | NA                                                           | 13.1 [7; 18.9]                                             | 71.0 [61.0; 81.0]                        |
| Montpellier      | France         | 2000-2010 | 26978    | 81.3 [61.2; 100.8]                                 | 19.8 [13.2; 27.0]                                             | NA                                                             | NA                                                           | 15.2 [10.1; 20.9]                                          | 68.0 [55.0; 80.0]                        |
| Marseille        | France         | 2000-2010 | 94792    | 79.4 [53.6; 101.4]                                 | 25.7 [19.3; 33.3]                                             | NA                                                             | NA                                                           | 15.5 [10; 21.5]                                            | 66.0 [56.0; 75.0]                        |

| City        | Country | Period    | N deaths | Ozone ( $\mu\text{g}/\text{m}^3$ )<br>Median [IQR] | PM <sub>10</sub> ( $\mu\text{g}/\text{m}^3$ )<br>Median [IQR] | PM <sub>2.5</sub> ( $\mu\text{g}/\text{m}^3$ )<br>Median [IQR] | NO <sub>2</sub> ( $\mu\text{g}/\text{m}^3$ )<br>Median [IQR] | Mean<br>temperature ( $^{\circ}\text{C}$ )<br>Median [IQR] | Relative<br>humidity (%)<br>Median [IQR] |
|-------------|---------|-----------|----------|----------------------------------------------------|---------------------------------------------------------------|----------------------------------------------------------------|--------------------------------------------------------------|------------------------------------------------------------|------------------------------------------|
| Nice        | France  | 2000-2010 | 51959    | 89.0 [58.4; 112.2]                                 | 23.0 [18.0; 29.1]                                             | NA                                                             | NA                                                           | 15.9 [11.2; 21.4]                                          | 69.0 [60.0; 76.0]                        |
| Nancy       | France  | 2000-2010 | 28945    | 61.6 [44.7; 81.9]                                  | 17.7 [12.9; 25.3]                                             | NA                                                             | NA                                                           | 11.2 [5.4; 16.6]                                           | 78.0 [70.0; 86.0]                        |
| Nantes      | France  | 2000-2010 | 43547    | 69.0 [53.4; 85.0]                                  | 15.2 [12.0; 19.3]                                             | NA                                                             | NA                                                           | 12.6 [8.5; 17]                                             | 81.0 [73.0; 88.0]                        |
| Paris       | France  | 2000-2010 | 455460   | 56.2 [35.2; 75.8]                                  | 19.3 [14.9; 25.2]                                             | NA                                                             | NA                                                           | 12.6 [7.7; 17.6]                                           | 73.0 [64.0; 81.0]                        |
| Rennes      | France  | 2000-2010 | 16600    | 65.0 [50.7; 79.9]                                  | 15.1 [11.4; 20.0]                                             | NA                                                             | NA                                                           | 12.3 [8.1; 16.8]                                           | 80.0 [73.0; 86.0]                        |
| Rouen       | France  | 2000-2010 | 41927    | 62.3 [45.9; 78.4]                                  | 18.0 [14.5; 23.5]                                             | NA                                                             | NA                                                           | 10.8 [6.2; 15.4]                                           | 83.0 [75.0; 90.0]                        |
| Strasbourg  | France  | 2000-2010 | 34874    | 60.1 [34.9; 85.4]                                  | 18.0 [13.0; 25.5]                                             | NA                                                             | NA                                                           | 11.4 [5.4; 17.3]                                           | 78.0 [70.0; 86.0]                        |
| Toulouse    | France  | 2000-2010 | 49675    | 73.5 [52.7; 93.0]                                  | 19.5 [14.5; 25.5]                                             | NA                                                             | NA                                                           | 13.6 [8.6; 19.3]                                           | 75.0 [65.0; 83.0]                        |
| Berlin      | Germany | 1993-2015 | 811051   | 55.1 [33.2; 79.5]                                  | 21.6 [15.8; 30.6]                                             | 14.4 [10.3; 21.7]                                              | 27.9 [21.2; 35.5]                                            | 10.4 [4.2; 16.5]                                           | NA                                       |
| Bremen      | Germany | 1993-2015 | 150608   | 55.6 [37.0; 75.2]                                  | 17.3 [13.1; 23.4]                                             | 11.6 [7.7; 18.8]                                               | 22.8 [16.3; 30.2]                                            | 10 [4.8; 15]                                               | NA                                       |
| Dresden     | Germany | 1993-2015 | 125866   | 62.2 [41.9; 85.5]                                  | 20.9 [13.7; 31.5]                                             | 11.7 [7.1; 20.2]                                               | 26.5 [19.1; 34.9]                                            | 9.9 [3.6; 15.9]                                            | NA                                       |
| Dortmund    | Germany | 1993-2015 | 155233   | 52.9 [34.2; 74.6]                                  | 22.1 [16.1; 31.3]                                             | 13.4 [9.5; 20.4]                                               | 31.7 [23.9; 40.8]                                            | 10.8 [5.7; 15.6]                                           | NA                                       |
| Duesseldorf | Germany | 1993-2015 | 160069   | 53.6 [32.5; 73.4]                                  | 19.7 [15.2; 26.8]                                             | 12.0 [8.2; 18.8]                                               | 29.9 [21.2; 39.5]                                            | 11.1 [6; 16]                                               | NA                                       |
| Frankfurt   | Germany | 1993-2015 | 168417   | 51.4 [26.9; 76.7]                                  | 21.2 [15.2; 30.2]                                             | 12.9 [9.2; 19.6]                                               | 42.1 [32.3; 51.8]                                            | 11.2 [5.3; 16.9]                                           | NA                                       |
| Hamburg     | Germany | 1993-2015 | 445338   | 54.2 [33.5; 72.7]                                  | 22.6 [16.3; 31.6]                                             | 12.7 [8.6; 18.7]                                               | 30.5 [22.7; 39.3]                                            | 10.2 [4.9; 15.3]                                           | NA                                       |
| Hannover    | Germany | 1993-2015 | 279125   | 61.3 [42.2; 80.7]                                  | 18.2 [13.0; 26.9]                                             | 9.9 [6.4; 15.8]                                                | 23.6 [16.2; 32.1]                                            | 10.2 [4.8; 15.3]                                           | NA                                       |
| Koeln       | Germany | 1993-2015 | 229457   | 54.8 [34.0; 75.9]                                  | 19.4 [13.5; 27.7]                                             | NA                                                             | 30.9 [21.7; 39.9]                                            | 10.9 [5.6; 15.8]                                           | NA                                       |
| Leipzig     | Germany | 1994-2015 | 146172   | 64.4 [44.2; 86.4]                                  | 18.1 [12.8; 26.0]                                             | 10.1 [6.3; 17.4]                                               | 19.7 [14.3; 26.9]                                            | 10.3 [4.3; 16.1]                                           | NA                                       |
| Muenchen    | Germany | 1993-2015 | 290962   | 60.0 [36.0; 83.4]                                  | 20.6 [13.7; 30.7]                                             | 11.6 [7.6; 17.0]                                               | 36.5 [28.2; 46.2]                                            | 10.3 [3.9; 16.2]                                           | NA                                       |
| Stuttgart   | Germany | 1993-2015 | 136878   | 60.2 [34.5; 86.5]                                  | 19.0 [13.0; 28.0]                                             | 11.4 [7.5; 18.0]                                               | 33.7 [24.9; 43.2]                                            | 11 [5; 16.6]                                               | NA                                       |
| Athens      | Greece  | 2001-2010 | 287969   | 75.1 [52.8; 97.5]                                  | 39.5 [29.5; 53.1]                                             | 20.3 [15.0; 26.4]                                              | 50.2 [39.6; 61.6]                                            | 17.9 [12.9; 24.9]                                          | 66.0 [54.0; 75.4]                        |
| Cagliari    | Italy   | 2006-2010 | 6440     | 58.9 [48.5; 71.4]                                  | 30.6 [24.1; 38.8]                                             | NA                                                             | NA                                                           | 16.7 [12.4; 22.4]                                          | NA                                       |
| Florence    | Italy   | 2006-2010 | 19609    | 76.3 [49.2; 104.3]                                 | 29.8 [23.5; 38.9]                                             | NA                                                             | NA                                                           | 15.1 [9.7; 21.5]                                           | NA                                       |
| Frosinone   | Italy   | 2006-2015 | 3787     | 87.1 [63.8; 110.4]                                 | 32.0 [23.0; 59.0]                                             | NA                                                             | NA                                                           | 15.4 [9.1; 22]                                             | NA                                       |

| City      | Country | Period    | N deaths | Ozone ( $\mu\text{g}/\text{m}^3$ )<br>Median [IQR] | PM <sub>10</sub> ( $\mu\text{g}/\text{m}^3$ )<br>Median [IQR] | PM <sub>2.5</sub> ( $\mu\text{g}/\text{m}^3$ )<br>Median [IQR] | NO <sub>2</sub> ( $\mu\text{g}/\text{m}^3$ )<br>Median [IQR] | Mean<br>temperature ( $^{\circ}\text{C}$ )<br>Median [IQR] | Relative<br>humidity (%)<br>Median [IQR] |
|-----------|---------|-----------|----------|----------------------------------------------------|---------------------------------------------------------------|----------------------------------------------------------------|--------------------------------------------------------------|------------------------------------------------------------|------------------------------------------|
| Genoa     | Italy   | 2006-2010 | 37943    | 77.5 [57.3; 100.7]                                 | 27.0 [21.0; 34.6]                                             | NA                                                             | NA                                                           | 16.3 [11.4; 21.5]                                          | NA                                       |
| Latina    | Italy   | 2006-2015 | 8661     | 78.5 [58.6; 96.1]                                  | 26.0 [20.0; 35.0]                                             | NA                                                             | NA                                                           | 16.9 [11.5; 23.1]                                          | NA                                       |
| Milan     | Italy   | 2006-2010 | 53837    | 55.0 [18.7; 92.2]                                  | 36.5 [25.7; 60.6]                                             | NA                                                             | NA                                                           | 14.1 [7.2; 21.1]                                           | NA                                       |
| Rieti     | Italy   | 2008-2015 | 3358     | 77.2 [51.1; 100.4]                                 | 20.0 [14.0; 28.2]                                             | NA                                                             | NA                                                           | 17 [10.3; 23.5]                                            | NA                                       |
| Rome      | Italy   | 2006-2015 | 226662   | 75.1 [44.2; 98.1]                                  | 28.7 [22.0; 38.0]                                             | NA                                                             | NA                                                           | 15.5 [10.4; 21.9]                                          | NA                                       |
| Trieste   | Italy   | 2006-2010 | 13124    | 81.6 [62.9; 99.8]                                  | 23.2 [15.6; 32.2]                                             | NA                                                             | NA                                                           | 15.6 [9.4; 21.7]                                           | NA                                       |
| Aikita    | Japan   | 2011-2015 | 17222    | 81.3 [70.3; 98.1]                                  | 12.8 [9.5; 18.5]                                              | 11.4 [8.1; 17.0]                                               | 11.8 [9.0; 15.7]                                             | 12.3 [3.3; 20.6]                                           | 73.0 [66.0; 80.0]                        |
| Aomori    | Japan   | 2011-2015 | 17107    | 74.7 [63.7; 88.4]                                  | 16.0 [12.7; 21.3]                                             | 10.6 [7.7; 14.9]                                               | 11.4 [8.1; 17.9]                                             | 11.2 [2; 18.9]                                             | 77.0 [70.0; 83.0]                        |
| Chiba     | Japan   | 2011-2015 | 38145    | 76.4 [59.8; 97.9]                                  | 16.9 [11.9; 24.4]                                             | 11.9 [7.7; 17.8]                                               | 23.4 [16.5; 33.9]                                            | 17 [8.9; 22.7]                                             | 69.0 [53.0; 77.0]                        |
| Fukushima | Japan   | 2011-2015 | 15116    | 74.0 [60.8; 92.1]                                  | 15.3 [11.2; 21.2]                                             | 10.0 [6.1; 15.2]                                               | 15.5 [10.7; 22.4]                                            | 14.1 [4.8; 21.4]                                           | 70.0 [61.0; 78.0]                        |
| Fukuoka   | Japan   | 2011-2015 | 54231    | 81.7 [64.4; 101.5]                                 | 19.9 [14.1; 28.0]                                             | 16.2 [11.0; 22.9]                                              | 21.2 [15.2; 29.4]                                            | 18 [10; 23.6]                                              | 68.0 [59.0; 78.0]                        |
| Fukui     | Japan   | 2011-2015 | 13479    | 85.2 [69.8; 104.8]                                 | 17.2 [11.7; 25.1]                                             | 13.4 [8.9; 19.1]                                               | 10.7 [7.7; 14.9]                                             | 15.4 [6.3; 22.6]                                           | 76.0 [68.0; 83.0]                        |
| Gifu      | Japan   | 2011-2015 | 20852    | 82.3 [63.4; 104.5]                                 | 12.7 [7.9; 19.6]                                              | 12.5 [8.2; 17.8]                                               | 17.8 [13.1; 23.1]                                            | 16.9 [7.9; 23.8]                                           | 65.0 [57.0; 74.0]                        |
| hiroshima | Japan   | 2011-2015 | 48257    | 79.9 [62.2; 101.8]                                 | 22.3 [16.2; 30.0]                                             | 15.6 [10.2; 22.4]                                              | 22.0 [16.1; 29.4]                                            | 16.9 [8.3; 23.7]                                           | 66.0 [60.0; 73.0]                        |
| Kagoshima | Japan   | 2011-2015 | 28646    | 70.2 [53.1; 86.5]                                  | 22.6 [16.8; 30.1]                                             | 15.4 [11.0; 22.0]                                              | 12.6 [8.7; 17.2]                                             | 19.5 [12.2; 24.8]                                          | 73.0 [64.0; 80.0]                        |
| Kumamoto  | Japan   | 2011-2015 | 32357    | 82.1 [63.1; 103.0]                                 | 22.5 [15.6; 30.7]                                             | 16.3 [9.3; 22.9]                                               | 17.3 [11.3; 25.5]                                            | 18 [9.6; 24]                                               | 70.0 [62.0; 78.0]                        |
| Kanazawa  | Japan   | 2011-2015 | 21061    | 87.7 [73.1; 104.0]                                 | 13.7 [9.0; 21.1]                                              | 10.2 [6.8; 15.2]                                               | 13.1 [9.9; 17.9]                                             | 15.6 [6.5; 22.6]                                           | 71.0 [64.0; 78.0]                        |
| Kobe      | Japan   | 2011-2015 | 73782    | 77.5 [61.3; 98.9]                                  | 15.9 [11.2; 23.6]                                             | 12.3 [8.4; 18.2]                                               | 25.9 [18.6; 35.2]                                            | 17.8 [9.1; 24]                                             | 63.0 [56.0; 72.0]                        |
| Kochi     | Japan   | 2011-2015 | 17800    | 81.1 [64.6; 98.4]                                  | 13.9 [9.5; 20.9]                                              | 13.0 [9.4; 18.8]                                               | 11.2 [8.3; 15.4]                                             | 18.1 [9.9; 23.6]                                           | 69.0 [59.0; 80.0]                        |
| Kofu      | Japan   | 2011-2015 | 10710    | 80.8 [64.7; 104.2]                                 | 18.5 [13.0; 25.5]                                             | 10.7 [6.8; 16.2]                                               | 18.8 [14.0; 29.2]                                            | 15.7 [6.9; 22.8]                                           | 64.0 [53.0; 72.0]                        |
| Kyoto     | Japan   | 2011-2015 | 69191    | 79.9 [62.7; 100.0]                                 | 14.0 [9.5; 20.4]                                              | 12.5 [8.8; 18.4]                                               | 22.4 [16.5; 30.3]                                            | 16.9 [7.8; 23.7]                                           | 66.0 [60.0; 73.0]                        |
| Matsue    | Japan   | 2011-2015 | 11146    | 91.4 [77.4; 109.5]                                 | 12.2 [7.7; 18.6]                                              | 12.4 [7.9; 18.1]                                               | 4.6 [3.3; 6.4]                                               | 15.6 [7.5; 22.2]                                           | 77.0 [70.0; 83.0]                        |
| Maebashi  | Japan   | 2011-2015 | 17449    | 84.3 [68.3; 111.0]                                 | 12.6 [6.1; 20.7]                                              | 14.0 [8.0; 20.4]                                               | 14.0 [9.4; 19.4]                                             | 15.6 [6.7; 22.5]                                           | 59.0 [49.0; 71.0]                        |
| Mito      | Japan   | 2011-2015 | 12662    | 81.1 [65.7; 101.2]                                 | 18.4 [13.7; 24.9]                                             | 10.4 [7.0; 15.2]                                               | 12.3 [9.4; 17.3]                                             | 14.9 [6.4; 21.2]                                           | 75.0 [63.0; 83.0]                        |

| City       | Country | Period    | N deaths | Ozone ( $\mu\text{g}/\text{m}^3$ )<br>Median [IQR] | PM <sub>10</sub> ( $\mu\text{g}/\text{m}^3$ )<br>Median [IQR] | PM <sub>2.5</sub> ( $\mu\text{g}/\text{m}^3$ )<br>Median [IQR] | NO <sub>2</sub> ( $\mu\text{g}/\text{m}^3$ )<br>Median [IQR] | Mean<br>temperature ( $^{\circ}\text{C}$ )<br>Median [IQR] | Relative<br>humidity (%)<br>Median [IQR] |
|------------|---------|-----------|----------|----------------------------------------------------|---------------------------------------------------------------|----------------------------------------------------------------|--------------------------------------------------------------|------------------------------------------------------------|------------------------------------------|
| Morioka    | Japan   | 2011-2015 | 14084    | 70.8 [58.3; 87.2]                                  | 10.7 [6.5; 16.8]                                              | 11.6 [7.9; 16.6]                                               | 13.2 [9.0; 22.0]                                             | 10.9 [1.6; 19.5]                                           | 74.0 [67.0; 82.0]                        |
| Matsuyama  | Japan   | 2011-2015 | 25345    | 73.8 [59.3; 93.8]                                  | 20.4 [14.2; 28.5]                                             | 16.6 [11.5; 22.8]                                              | 20.0 [14.9; 26.3]                                            | 17.4 [9; 23.3]                                             | 66.0 [58.0; 75.0]                        |
| Nagano     | Japan   | 2011-2015 | 19818    | 77.0 [62.9; 95.7]                                  | 13.8 [8.9; 20.6]                                              | 10.2 [6.3; 15.4]                                               | 13.4 [9.8; 20.8]                                             | 12.8 [3.1; 21]                                             | 74.0 [66.0; 80.0]                        |
| Nagoya     | Japan   | 2011-2015 | 100810   | 79.5 [60.6; 102.7]                                 | 19.8 [13.4; 27.4]                                             | 14.1 [9.6; 19.7]                                               | 28.1 [20.4; 39.0]                                            | 16.9 [8.1; 23.7]                                           | 66.0 [57.0; 74.0]                        |
| Naha       | Japan   | 2011-2015 | 12468    | 69.0 [32.5; 83.3]                                  | 19.0 [14.3; 27.1]                                             | 8.8 [6.3; 12.7]                                                | 10.0 [5.8; 16.5]                                             | 23.6 [19.2; 27.8]                                          | 76.0 [66.0; 82.0]                        |
| Nara       | Japan   | 2011-2015 | 16901    | 77.9 [63.2; 98.7]                                  | 15.4 [10.7; 21.6]                                             | 11.7 [7.5; 17.3]                                               | 15.9 [11.2; 22.7]                                            | 15.8 [6.9; 22.5]                                           | 73.0 [66.0; 80.0]                        |
| Nagasaki   | Japan   | 2011-2015 | 24586    | 75.9 [61.1; 94.1]                                  | 20.1 [14.8; 28.0]                                             | 14.4 [9.4; 20.2]                                               | 13.7 [10.3; 17.9]                                            | 18 [10.3; 23.5]                                            | 72.0 [63.0; 81.0]                        |
| Niigata    | Japan   | 2011-2015 | 40382    | 82.6 [71.2; 98.1]                                  | 16.3 [12.7; 21.9]                                             | 10.5 [7.0; 15.5]                                               | 12.3 [9.0; 16.9]                                             | 14.2 [5.3; 22.1]                                           | 72.0 [65.0; 79.0]                        |
| Oita       | Japan   | 2011-2015 | 19860    | 72.0 [57.7; 89.1]                                  | 16.4 [11.6; 23.0]                                             | 15.1 [10.0; 21.8]                                              | 13.9 [10.6; 18.3]                                            | 17.2 [9.3; 23.1]                                           | 69.0 [60.0; 78.0]                        |
| Okayama    | Japan   | 2011-2015 | 31950    | 76.0 [60.0; 96.5]                                  | 19.4 [13.6; 28.5]                                             | 15.0 [10.6; 21.5]                                              | 21.9 [16.0; 29.0]                                            | 16.8 [7.8; 23.6]                                           | 65.0 [58.0; 74.0]                        |
| Osaka      | Japan   | 2011-2015 | 135736   | 74.9 [56.8; 96.8]                                  | 19.6 [14.3; 27.7]                                             | 15.6 [10.8; 21.8]                                              | 36.5 [27.8; 49.0]                                            | 17.6 [8.9; 24]                                             | 63.0 [55.0; 71.0]                        |
| Otsu       | Japan   | 2011-2015 | 13929    | 81.9 [65.6; 102.5]                                 | 16.1 [11.5; 22.5]                                             | 10.8 [6.7; 16.3]                                               | 15.8 [11.4; 22.3]                                            | 15.8 [7; 22.8]                                             | 72.0 [67.0; 80.0]                        |
| Saga       | Japan   | 2011-2015 | 12400    | 83.4 [66.4; 104.6]                                 | 16.3 [11.3; 23.2]                                             | 13.2 [8.4; 20.0]                                               | 9.3 [7.1; 13.2]                                              | 17.7 [9.2; 23.8]                                           | 70.0 [63.0; 79.0]                        |
| Saitama    | Japan   | 2011-2015 | 47101    | 77.7 [59.2; 101.5]                                 | 18.7 [12.9; 26.7]                                             | 12.6 [8.1; 18.4]                                               | 27.8 [20.3; 37.9]                                            | 16.2 [7.1; 22.7]                                           | 65.0 [51.0; 76.0]                        |
| Sendai     | Japan   | 2011-2015 | 40680    | 75.1 [62.5; 93.6]                                  | 14.0 [9.8; 21.1]                                              | 10.5 [6.6; 16.3]                                               | 17.0 [12.0; 24.1]                                            | 13.6 [4.7; 20.3]                                           | 71.0 [61.0; 81.0]                        |
| Shizuoka   | Japan   | 2011-2015 | 37343    | 82.1 [64.0; 104.7]                                 | 17.3 [12.0; 23.7]                                             | 10.7 [7.4; 15.7]                                               | 19.9 [15.1; 25.2]                                            | 17.6 [10; 23.3]                                            | 69.0 [57.0; 77.0]                        |
| Sapporo    | Japan   | 2011-2015 | 84189    | 64.3 [53.4; 81.4]                                  | 10.0 [7.2; 14.1]                                              | 8.8 [6.0; 13.0]                                                | 20.0 [13.9; 31.2]                                            | 9.7 [0.5; 18.3]                                            | 70.0 [62.0; 76.0]                        |
| Takamatsu  | Japan   | 2011-2015 | 20843    | 78.5 [63.0; 94.5]                                  | 19.9 [13.6; 29.1]                                             | 15.2 [10.2; 22.1]                                              | 19.4 [13.4; 28.8]                                            | 17.3 [8.6; 23.8]                                           | 66.0 [58.0; 75.0]                        |
| Tokushima  | Japan   | 2011-2015 | 13790    | 80.3 [64.7; 103.5]                                 | 16.8 [11.7; 24.3]                                             | 12.5 [8.2; 18.5]                                               | 13.3 [10.1; 17.6]                                            | 17.5 [9; 23.5]                                             | 68.0 [58.0; 76.0]                        |
| Tokyo      | Japan   | 2011-2015 | 374187   | 71.0 [53.8; 92.3]                                  | 19.1 [13.5; 26.3]                                             | 13.9 [9.8; 19.9]                                               | 35.1 [26.0; 47.0]                                            | 17.4 [8.9; 23.1]                                           | 65.0 [49.0; 74.0]                        |
| Toyama     | Japan   | 2011-2015 | 22126    | 84.2 [71.2; 102.6]                                 | 12.6 [7.6; 19.4]                                              | 9.4 [5.9; 14.0]                                                | 11.9 [8.7; 16.4]                                             | 15.2 [5.8; 22.4]                                           | 76.0 [67.0; 84.0]                        |
| Tsu        | Japan   | 2011-2015 | 14919    | 85.3 [68.0; 106.3]                                 | 21.5 [15.8; 28.9]                                             | 13.0 [8.6; 18.6]                                               | 13.8 [9.8; 19.7]                                             | 16.7 [8.3; 23.5]                                           | 67.0 [58.0; 77.0]                        |
| Utsunomiya | Japan   | 2011-2015 | 21851    | 79.9 [60.8; 104.7]                                 | 17.4 [12.5; 24.6]                                             | 11.9 [8.0; 17.3]                                               | 21.0 [16.0; 29.3]                                            | 15.2 [6; 21.8]                                             | 68.0 [58.0; 78.0]                        |
| Wakayama   | Japan   | 2011-2015 | 21449    | 80.9 [65.3; 103.0]                                 | 19.5 [14.5; 26.3]                                             | 14.2 [9.7; 19.9]                                               | 16.7 [13.0; 21.8]                                            | 17.7 [9.1; 23.7]                                           | 65.0 [57.0; 73.0]                        |



| City             | Country      | Period    | N deaths | Ozone ( $\mu\text{g}/\text{m}^3$ )<br>Median [IQR] | PM <sub>10</sub> ( $\mu\text{g}/\text{m}^3$ )<br>Median [IQR] | PM <sub>2.5</sub> ( $\mu\text{g}/\text{m}^3$ )<br>Median [IQR] | NO <sub>2</sub> ( $\mu\text{g}/\text{m}^3$ )<br>Median [IQR] | Mean<br>temperature ( $^{\circ}\text{C}$ )<br>Median [IQR] | Relative<br>humidity (%)<br>Median [IQR] |
|------------------|--------------|-----------|----------|----------------------------------------------------|---------------------------------------------------------------|----------------------------------------------------------------|--------------------------------------------------------------|------------------------------------------------------------|------------------------------------------|
| Yokohama         | Japan        | 2011-2015 | 146525   | 69.8 [51.6; 96.9]                                  | 21.6 [15.8; 29.2]                                             | 13.3 [9.1; 19.3]                                               | 29.8 [20.4; 40.4]                                            | 17.2 [9; 22.7]                                             | 70.0 [54.0; 79.0]                        |
| Yamaguchi        | Japan        | 2011-2015 | 10481    | 77.8 [61.5; 98.5]                                  | 10.7 [6.6; 17.2]                                              | 13.0 [8.3; 18.8]                                               | 16.4 [11.8; 21.8]                                            | 16.3 [7.7; 22.8]                                           | 73.0 [66.0; 80.0]                        |
| Yamagata         | Japan        | 2011-2015 | 13266    | 77.7 [63.4; 95.1]                                  | 14.6 [9.8; 21.5]                                              | 10.7 [6.8; 16.6]                                               | 15.6 [11.2; 24.4]                                            | 12.3 [2.5; 20.9]                                           | 74.0 [66.0; 81.0]                        |
| Busan            | South Korea  | 1999-2015 | 323037   | 64.5 [49.9; 82.7]                                  | 47.9 [36.3; 64.5]                                             | NA                                                             | 40.7 [31.0; 52.6]                                            | 16 [8.3; 21.6]                                             | 64.6 [48.1; 77.5]                        |
| Daegu            | South Korea  | 1999-2015 | 198083   | 61.3 [43.8; 87.4]                                  | 48.0 [35.0; 64.9]                                             | NA                                                             | 43.2 [32.0; 57.9]                                            | 15.8 [6.3; 22.8]                                           | 58.9 [45.1; 69.9]                        |
| Daejeon          | South Korea  | 1999-2015 | 102449   | 59.2 [40.4; 84.0]                                  | 40.9 [28.7; 56.8]                                             | NA                                                             | 36.6 [27.0; 50.7]                                            | 14.4 [4.5; 22.2]                                           | 68.0 [57.3; 77.1]                        |
| Gwangju          | South Korea  | 1999-2015 | 104787   | 60.8 [43.0; 84.2]                                  | 41.2 [29.8; 56.9]                                             | NA                                                             | 36.9 [27.6; 49.1]                                            | 15.4 [6; 22.6]                                             | 67.5 [58.0; 76.0]                        |
| Incheon          | South Korea  | 1999-2015 | 195684   | 57.1 [40.7; 78.5]                                  | 50.0 [36.0; 68.2]                                             | NA                                                             | 50.6 [37.9; 66.7]                                            | 14 [4.3; 21.6]                                             | 69.8 [57.9; 80.9]                        |
| Seoul            | South Korea  | 1999-2015 | 666658   | 49.6 [31.5; 72.9]                                  | 49.9 [34.1; 71.3]                                             | NA                                                             | 65.7 [50.4; 84.5]                                            | 14.4 [4; 22.3]                                             | 61.5 [50.5; 72.0]                        |
| Ulsan            | South Korea  | 1999-2015 | 71501    | 64.2 [49.6; 83.9]                                  | 43.8 [33.2; 58.3]                                             | NA                                                             | 37.5 [29.2; 48.1]                                            | 15.5 [7; 21.6]                                             | 65.0 [49.0; 75.6]                        |
| Guadalajara      | Mexico       | 2000-2012 | 267190   | 113.7 [88.2; 149.0]                                | 46.8 [33.1; 62.4]                                             | 24.1 [18.5; 32.3]                                              | NA                                                           | 21.3 [19.4; 22.9]                                          | 59.1 [42.5; 75.1]                        |
| Leon             | Mexico       | 2005-2012 | 54605    | 107.8 [84.3; 129.4]                                | 55.5 [40.3; 76.0]                                             | NA                                                             | NA                                                           | 20 [17; 22]                                                | 47.0 [35.0; 62.0]                        |
| Monterrey        | Mexico       | 2000-2012 | 218397   | 96.0 [72.5; 119.6]                                 | 74.1 [57.7; 95.1]                                             | 26.3 [20.1; 33.7]                                              | NA                                                           | 23.2 [18.3; 26.8]                                          | 63.8 [53.3; 73.1]                        |
| Puebla-Tlaxcala  | Mexico       | 2000-2011 | 143078   | 92.1 [68.6; 121.5]                                 | 34.7 [26.1; 49.6]                                             | 17.7 [14.4; 23.0]                                              | NA                                                           | 16.9 [15.1; 18.1]                                          | 63.0 [54.8; 70.6]                        |
| Tijuana          | Mexico       | 2000-2012 | 73801    | 76.4 [64.7; 90.2]                                  | 60.5 [46.0; 84.3]                                             | NA                                                             | NA                                                           | 18 [14; 20]                                                | 76.0 [69.0; 80.0]                        |
| Toluca de Lerdo  | Mexico       | 2000-2012 | 98959    | 111.7 [90.2; 133.3]                                | 60.2 [38.8; 87.3]                                             | 31.9 [24.1; 39.0]                                              | NA                                                           | 14.4 [12.7; 15.5]                                          | 63.0 [53.0; 71.7]                        |
| Valley of Mexico | Mexico       | 2000-2012 | 1162283  | 164.6 [127.4; 201.9]                               | 49.3 [35.3; 65.7]                                             | 24.9 [17.9; 32.6]                                              | NA                                                           | 16.5 [14.9; 17.8]                                          | 54.0 [42.5; 65.0]                        |
| Lisboa           | Portugal     | 1997-2012 | 337920   | 66.8 [52.2; 82.2]                                  | 24.4 [17.1; 35.5]                                             | 11.0 [7.1; 18.0]                                               | 29.2 [18.0; 43.1]                                            | 17.1 [13.3; 20.9]                                          | NA                                       |
| Porto            | Portugal     | 1999-2012 | 199038   | 61.6 [48.2; 76.2]                                  | 30.1 [19.9; 46.1]                                             | NA                                                             | 24.7 [16.5; 34.8]                                            | 15.2 [11.8; 18.4]                                          | NA                                       |
| Johannesburg     | South Africa | 2004-2013 | 344680   | 65.6 [47.5; 88.7]                                  | 50.4 [36.5; 70.5]                                             | 32.8 [23.1; 47.4]                                              | NA                                                           | 17.6 [13.5; 20.1]                                          | NA                                       |
| eThekweni        | South Africa | 2004-2013 | 354160   | 55.2 [41.6; 71.1]                                  | NA                                                            | NA                                                             | NA                                                           | 21.6 [18.9; 24.2]                                          | NA                                       |
| Gert Sibande DM  | South Africa | 2008-2013 | 73257    | 84.3 [67.0; 101.6]                                 | 46.5 [27.3; 75.8]                                             | 25.5 [15.7; 38.6]                                              | NA                                                           | 16.8 [13.3; 19.7]                                          | NA                                       |
| Nkangala DM      | South Africa | 2008-2013 | 74552    | 68.9 [51.1; 96.5]                                  | 36.2 [20.8; 61.8]                                             | 17.8 [11.5; 28.2]                                              | NA                                                           | 17 [11.8; 20.3]                                            | NA                                       |
| Sedibeng DM      | South Africa | 2007-2013 | 77829    | 73.5 [57.5; 89.7]                                  | 59.2 [40.8; 84.5]                                             | 31.9 [22.5; 44.2]                                              | NA                                                           | 18.6 [13.3; 21.5]                                          | NA                                       |

| City        | Country | Period    | N deaths | Ozone ( $\mu\text{g}/\text{m}^3$ )<br>Median [IQR] | PM <sub>10</sub> ( $\mu\text{g}/\text{m}^3$ )<br>Median [IQR] | PM <sub>2.5</sub> ( $\mu\text{g}/\text{m}^3$ )<br>Median [IQR] | NO <sub>2</sub> ( $\mu\text{g}/\text{m}^3$ )<br>Median [IQR] | Mean<br>temperature ( $^{\circ}\text{C}$ )<br>Median [IQR] | Relative<br>humidity (%)<br>Median [IQR] |
|-------------|---------|-----------|----------|----------------------------------------------------|---------------------------------------------------------------|----------------------------------------------------------------|--------------------------------------------------------------|------------------------------------------------------------|------------------------------------------|
| A Coruna    | Spain   | 2005-2014 | 22778    | 56.9 [35.1; 75.1]                                  | 25.0 [19.5; 32.0]                                             | 9.8 [4.2; 13.7]                                                | 26.6 [18.8; 37.2]                                            | 15.2 [12.2; 18.4]                                          | NA                                       |
| Albacete    | Spain   | 2004-2014 | 12068    | 85.5 [64.2; 103.0]                                 | 36.3 [27.5; 47.1]                                             | 11.9 [8.2; 16.7]                                               | 13.0 [8.4; 19.1]                                             | 14.2 [8.2; 21.7]                                           | NA                                       |
| Alicante    | Spain   | 2004-2014 | 27376    | 76.1 [61.3; 88.0]                                  | 19.0 [14.6; 22.9]                                             | NA                                                             | 30.1 [24.3; 37.1]                                            | 18.6 [13.6; 23.7]                                          | NA                                       |
| Almeria     | Spain   | 2004-2014 | 14734    | 79.7 [66.9; 92.3]                                  | 23.5 [19.2; 30.5]                                             | NA                                                             | 21.3 [16.4; 27.4]                                            | 18.5 [14.4; 23.8]                                          | NA                                       |
| Avila       | Spain   | 2004-2014 | 4977     | 69.8 [59.4; 81.6]                                  | 21.5 [18.1; 25.1]                                             | NA                                                             | 21.6 [17.3; 26.1]                                            | 11.1 [5.8; 17.8]                                           | NA                                       |
| Badajoz     | Spain   | 2005-2014 | 10466    | 51.8 [36.2; 67.2]                                  | 28.1 [14.3; 97.0]                                             | NA                                                             | 7.7 [4.4; 12.4]                                              | 17 [11.6; 23.2]                                            | NA                                       |
| Bilbao      | Spain   | 2004-2014 | 38517    | 56.8 [42.2; 68.4]                                  | 35.3 [30.3; 41.7]                                             | 11.0 [6.9; 16.2]                                               | 36.1 [28.3; 44.8]                                            | 15.2 [10.9; 19.3]                                          | NA                                       |
| Barcelona   | Spain   | 2004-2014 | 167513   | 60.2 [40.6; 75.3]                                  | 28.8 [21.0; 40.2]                                             | 18.4 [13.2; 26.0]                                              | 44.2 [34.4; 54.9]                                            | 16.6 [11.6; 22.4]                                          | NA                                       |
| Burgos      | Spain   | 2004-2014 | 16854    | 75.8 [60.2; 92.0]                                  | 25.6 [20.2; 32.5]                                             | 7.6 [5.0; 12.2]                                                | 23.0 [17.2; 31.2]                                            | 10.6 [5.4; 16.6]                                           | NA                                       |
| Cadiz       | Spain   | 2004-2014 | 13347    | 81.0 [65.9; 94.1]                                  | 33.3 [26.3; 44.5]                                             | NA                                                             | 17.6 [11.8; 25.0]                                            | 18.4 [14.6; 23]                                            | NA                                       |
| Caceres     | Spain   | 2005-2014 | 6535     | 64.2 [56.0; 72.1]                                  | 33.9 [17.8; 89.7]                                             | 5.9 [4.2; 8.2]                                                 | 11.3 [6.5; 17.4]                                             | 15.8 [10.4; 22.7]                                          | NA                                       |
| Ciudad Real | Spain   | 2008-2014 | 3863     | 83.4 [66.2; 99.4]                                  | 19.3 [12.8; 27.8]                                             | NA                                                             | 8.4 [4.6; 14.3]                                              | 15.2 [9.1; 23.2]                                           | NA                                       |
| Ceuta       | Spain   | 2004-2014 | 5421     | 77.8 [58.8; 97.3]                                  | NA                                                            | NA                                                             | NA                                                           | 18.1 [14.9; 22.6]                                          | NA                                       |
| Cordoba     | Spain   | 2004-2014 | 27705    | 77.3 [64.5; 89.3]                                  | 42.7 [36.1; 51.3]                                             | NA                                                             | 29.6 [25.0; 34.7]                                            | 18 [12.2; 25]                                              | NA                                       |
| Castellon   | Spain   | 2004-2014 | 13790    | 64.7 [56.2; 72.0]                                  | 30.1 [25.5; 35.1]                                             | NA                                                             | 39.3 [33.4; 46.2]                                            | 18 [13; 23.5]                                              | NA                                       |
| Cuenca      | Spain   | 2008-2014 | 3435     | 81.8 [60.8; 99.8]                                  | 25.5 [17.2; 34.2]                                             | NA                                                             | 16.2 [8.7; 23.9]                                             | 13.2 [7.4; 20.5]                                           | NA                                       |
| Guadalajara | Spain   | 2004-2014 | 5856     | 83.1 [56.6; 107.2]                                 | 22.5 [14.9; 32.6]                                             | NA                                                             | 24.7 [15.2; 36.0]                                            | 12.2 [6.8; 19.4]                                           | NA                                       |
| Granada     | Spain   | 2004-2014 | 23395    | 72.0 [56.5; 85.8]                                  | 36.0 [26.6; 46.0]                                             | NA                                                             | 38.8 [30.3; 48.2]                                            | 15.1 [9.1; 22.3]                                           | NA                                       |
| Huesca      | Spain   | 2004-2014 | 5372     | 81.2 [62.5; 99.8]                                  | 17.3 [12.3; 22.9]                                             | 10.6 [8.1; 14.3]                                               | 18.1 [12.9; 26.1]                                            | 14.3 [8.4; 20.8]                                           | NA                                       |
| Jaen        | Spain   | 2004-2014 | 9584     | 89.5 [69.1; 107.7]                                 | 36.1 [24.9; 50.6]                                             | NA                                                             | 17.9 [13.2; 24.9]                                            | 16.4 [10.8; 23.6]                                          | NA                                       |
| Leon        | Spain   | 2004-2014 | 15023    | 60.8 [43.7; 77.5]                                  | 22.3 [16.8; 29.5]                                             | 5.1 [3.2; 7.8]                                                 | 27.5 [20.7; 36.7]                                            | 10.8 [5.5; 16.7]                                           | NA                                       |
| Lleida      | Spain   | 2004-2013 | 10700    | 71.5 [43.8; 92.1]                                  | NA                                                            | NA                                                             | 25.2 [18.0; 33.9]                                            | 15.4 [8.8; 22]                                             | NA                                       |
| Lugo        | Spain   | 2005-2014 | 8745     | 57.1 [41.8; 73.8]                                  | 20.3 [15.3; 24.8]                                             | NA                                                             | 22.2 [18.1; 26.6]                                            | 12.3 [8.2; 16.7]                                           | NA                                       |
| Malaga      | Spain   | 2004-2014 | 48400    | 78.2 [66.3; 89.3]                                  | 24.6 [20.6; 30.0]                                             | NA                                                             | 31.8 [26.2; 38.0]                                            | 18.7 [14.4; 23.9]                                          | NA                                       |

| City              | Country | Period    | N deaths | Ozone ( $\mu\text{g}/\text{m}^3$ )<br>Median [IQR] | PM <sub>10</sub> ( $\mu\text{g}/\text{m}^3$ )<br>Median [IQR] | PM <sub>2.5</sub> ( $\mu\text{g}/\text{m}^3$ )<br>Median [IQR] | NO <sub>2</sub> ( $\mu\text{g}/\text{m}^3$ )<br>Median [IQR] | Mean<br>temperature ( $^{\circ}\text{C}$ )<br>Median [IQR] | Relative<br>humidity (%)<br>Median [IQR] |
|-------------------|---------|-----------|----------|----------------------------------------------------|---------------------------------------------------------------|----------------------------------------------------------------|--------------------------------------------------------------|------------------------------------------------------------|------------------------------------------|
| Madrid            | Spain   | 2004-2014 | 284880   | 58.0 [38.2; 77.1]                                  | 24.1 [16.6; 33.9]                                             | 10.9 [8.2; 14.3]                                               | 43.7 [33.9; 56.4]                                            | 14.6 [8.8; 22.2]                                           | NA                                       |
| Melilla           | Spain   | 2004-2014 | 4748     | 80.3 [61.2; 104.5]                                 | NA                                                            | NA                                                             | NA                                                           | 18.6 [15; 23.4]                                            | NA                                       |
| Murcia            | Spain   | 2009-2014 | 17074    | 80.2 [54.9; 98.5]                                  | 22.2 [18.4; 26.6]                                             | NA                                                             | 45.1 [39.8; 50.5]                                            | 19.2 [13.6; 25.4]                                          | NA                                       |
| Ourense           | Spain   | 2004-2014 | 11763    | 65.4 [46.7; 83.9]                                  | 14.1 [10.6; 20.2]                                             | NA                                                             | 29.6 [20.7; 40.4]                                            | 15.2 [10.4; 20.3]                                          | NA                                       |
| Oviedo            | Spain   | 2004-2014 | 23282    | 61.0 [46.8; 73.2]                                  | 27.8 [20.9; 37.9]                                             | 10.4 [7.2; 14.7]                                               | 28.2 [21.2; 38.1]                                            | 13.6 [9.5; 17.5]                                           | NA                                       |
| Palmas Gu Canaria | Spain   | 2004-2014 | 31691    | 48.4 [40.0; 59.6]                                  | 24.6 [18.2; 32.6]                                             | 6.5 [5.1; 8.9]                                                 | 22.1 [15.9; 30.0]                                            | 21.2 [19; 23.6]                                            | NA                                       |
| Palma Mallorca    | Spain   | 2004-2014 | 31053    | 69.3 [57.0; 81.1]                                  | 21.4 [16.5; 27.0]                                             | 10.6 [8.3; 13.6]                                               | 25.5 [19.9; 32.1]                                            | 16.6 [11.8; 22.5]                                          | NA                                       |
| Palencia          | Spain   | 2004-2014 | 8610     | 69.2 [60.5; 78.8]                                  | 26.2 [22.8; 30.4]                                             | NA                                                             | 27.6 [23.3; 32.6]                                            | 11.6 [6.1; 17.9]                                           | NA                                       |
| Pamplona          | Spain   | 2004-2014 | 17757    | 65.2 [50.6; 79.1]                                  | NA                                                            | NA                                                             | NA                                                           | 13.2 [7.8; 18.8]                                           | NA                                       |
| Segovia           | Spain   | 2004-2014 | 5412     | 73.3 [63.1; 83.1]                                  | 21.2 [16.7; 25.4]                                             | NA                                                             | 29.7 [25.4; 34.0]                                            | 12.1 [6.4; 18.8]                                           | NA                                       |
| Salamanca         | Spain   | 2004-2014 | 16314    | 61.1 [47.8; 74.6]                                  | 20.2 [15.9; 26.0]                                             | 6.7 [5.0; 9.6]                                                 | 31.6 [26.1; 38.5]                                            | 12 [6.6; 18.2]                                             | NA                                       |
| San Sebastian     | Spain   | 2004-2014 | 19051    | 57.5 [44.0; 71.0]                                  | 22.2 [17.1; 29.3]                                             | 10.1 [7.7; 14.0]                                               | 27.8 [20.8; 36.9]                                            | 13.9 [9.8; 17.8]                                           | NA                                       |
| Santander         | Spain   | 2004-2014 | 19877    | 53.8 [41.6; 66.0]                                  | 26.0 [20.3; 33.1]                                             | NA                                                             | 26.6 [20.8; 33.7]                                            | 14.9 [11; 18.8]                                            | NA                                       |
| Soria             | Spain   | 2004-2014 | 3872     | 68.1 [52.6; 83.0]                                  | 22.4 [14.3; 31.1]                                             | NA                                                             | 24.7 [17.4; 32.5]                                            | 10.6 [5.3; 17]                                             | NA                                       |
| Sevilla           | Spain   | 2004-2014 | 63663    | 76.7 [53.9; 96.1]                                  | 39.3 [31.8; 48.6]                                             | 13.8 [10.7; 18.6]                                              | 31.5 [23.6; 40.5]                                            | 19.2 [13.7; 25.6]                                          | NA                                       |
| Teruel            | Spain   | 2004-2014 | 3354     | 82.0 [65.2; 97.9]                                  | 18.2 [13.3; 25.1]                                             | NA                                                             | 14.3 [9.6; 20.8]                                             | 12.3 [6.2; 19.2]                                           | NA                                       |
| Tenerife          | Spain   | 2010-2014 | 8541     | 73.9 [63.4; 83.9]                                  | 16.0 [12.0; 22.0]                                             | 6.7 [4.6; 10.6]                                                | 18.2 [12.6; 26.0]                                            | 21.6 [19.2; 24.4]                                          | NA                                       |
| Toledo            | Spain   | 2004-2014 | 5627     | 84.4 [70.8; 96.4]                                  | 33.8 [29.0; 39.5]                                             | 11.5 [7.8; 16.2]                                               | 24.6 [20.7; 29.4]                                            | 15.3 [9.4; 23.1]                                           | NA                                       |
| Tarragona         | Spain   | 2004-2014 | 10255    | 78.0 [55.5; 93.5]                                  | NA                                                            | NA                                                             | 24.6 [17.8; 33.5]                                            | 18 [12.6; 24.1]                                            | NA                                       |
| Vitoria           | Spain   | 2004-2011 | 13389    | 65.8 [49.9; 81.1]                                  | 20.3 [14.0; 29.7]                                             | 7.6 [5.8; 10.4]                                                | 27.9 [20.0; 36.8]                                            | 11.8 [6.8; 16.6]                                           | NA                                       |
| Valladolid        | Spain   | 2004-2014 | 29470    | 74.5 [54.3; 91.8]                                  | 17.8 [12.5; 23.9]                                             | 11.3 [7.8; 16.1]                                               | 28.1 [21.2; 36.4]                                            | 12.6 [6.8; 19.1]                                           | NA                                       |
| Valencia          | Spain   | 2004-2014 | 76883    | 60.1 [43.7; 71.3]                                  | 24.2 [18.0; 32.0]                                             | 14.5 [9.5; 21.0]                                               | 37.9 [29.3; 48.2]                                            | 18.5 [13.8; 23.6]                                          | NA                                       |
| Zamora            | Spain   | 2004-2014 | 6834     | 69.2 [59.3; 78.6]                                  | 22.6 [19.5; 26.5]                                             | NA                                                             | 28.0 [24.1; 32.2]                                            | 12.9 [7.4; 19.4]                                           | NA                                       |
| Zaragoza          | Spain   | 2004-2014 | 64308    | 48.5 [30.1; 63.6]                                  | 27.5 [18.5; 40.0]                                             | NA                                                             | 40.3 [32.1; 48.9]                                            | 15.8 [9.8; 22.4]                                           | NA                                       |

| City               | Country     | Period    | N deaths | Ozone ( $\mu\text{g}/\text{m}^3$ )<br>Median [IQR] | PM <sub>10</sub> ( $\mu\text{g}/\text{m}^3$ )<br>Median [IQR] | PM <sub>2.5</sub> ( $\mu\text{g}/\text{m}^3$ )<br>Median [IQR] | NO <sub>2</sub> ( $\mu\text{g}/\text{m}^3$ )<br>Median [IQR] | Mean<br>temperature ( $^{\circ}\text{C}$ )<br>Median [IQR] | Relative<br>humidity (%)<br>Median [IQR] |
|--------------------|-------------|-----------|----------|----------------------------------------------------|---------------------------------------------------------------|----------------------------------------------------------------|--------------------------------------------------------------|------------------------------------------------------------|------------------------------------------|
| Basel              | Switzerland | 1995-2013 | 37607    | 71.7 [44.0; 94.4]                                  | 18.7 [11.9; 28.4]                                             | 13.5 [8.2; 21.5]                                               | 23.7 [14.5; 35.2]                                            | 11.2 [5.1; 16.7]                                           | 75.9 [67.5; 82.8]                        |
| Bern               | Switzerland | 2003-2013 | 15142    | 74.3 [50.3; 97.3]                                  | 26.3 [19.1; 36.7]                                             | 17.4 [12.2; 24.8]                                              | 45.9 [37.5; 55.3]                                            | 9.7 [2.8; 15.6]                                            | 78.6 [70.3; 85.8]                        |
| Geneve             | Switzerland | 1995-2013 | 26306    | 64.9 [39.8; 87.2]                                  | 20.2 [13.3; 29.9]                                             | NA                                                             | 36.6 [27.7; 46.6]                                            | 11.3 [4.9; 17]                                             | 72.7 [64.2; 80.9]                        |
| Lausanne           | Switzerland | 1995-2013 | 20810    | 73.5 [50.7; 97.2]                                  | 23.3 [15.7; 34.2]                                             | NA                                                             | 44.7 [35.5; 53.4]                                            | 11.5 [5.5; 17.2]                                           | 72.0 [63.6; 79.3]                        |
| Lugano             | Switzerland | 1995-2013 | 28567    | 73.8 [33.5; 112.0]                                 | 24.8 [15.7; 37.6]                                             | 19.3 [11.9; 30.3]                                              | 35.7 [24.2; 49.0]                                            | 12.8 [6.7; 19]                                             | 70.5 [59.7; 80.2]                        |
| Luzern             | Switzerland | 1995-2013 | 15073    | 66.6 [37.2; 92.9]                                  | 18.7 [12.5; 27.4]                                             | NA                                                             | 24.2 [18.0; 32.5]                                            | 10.2 [3.7; 16.1]                                           | 78.9 [70.3; 85.7]                        |
| St. Gallen         | Switzerland | 1995-2013 | 13543    | 84.6 [70.0; 105.0]                                 | 15.9 [9.9; 24.5]                                              | NA                                                             | 12.2 [8.3; 18.8]                                             | 9.1 [2.7; 14.5]                                            | 77.2 [67.0; 86.0]                        |
| Zurich             | Switzerland | 1995-2013 | 73539    | 73.2 [50.3; 98.5]                                  | 19.9 [13.1; 29.7]                                             | 13.9 [9.3; 21.8]                                               | 33.2 [24.7; 43.3]                                            | 10.1 [3.6; 15.7]                                           | 78.0 [68.3; 85.6]                        |
| Stockholm          | Sweden      | 1990-2010 | 201197   | 61.9 [48.9; 76.0]                                  | 12.5 [9.3; 17.9]                                              | 6.6 [4.7; 9.5]                                                 | 26.8 [20.0; 34.8]                                            | 6.8 [1.2; 13.9]                                            | 79.6 [68.4; 87.6]                        |
| Kaohsiung          | Taiwan      | 2008-2014 | 119890   | 127.1 [88.0; 161.2]                                | 70.3 [43.7; 95.8]                                             | 40.8 [23.6; 54.6]                                              | 35.9 [25.4; 48.5]                                            | 26.4 [22.4; 28.7]                                          | 75.0 [71.0; 78.0]                        |
| Taipei             | Taiwan      | 2008-2014 | 230039   | 98.2 [79.4; 123.5]                                 | 42.1 [31.6; 56.4]                                             | 24.8 [17.4; 34.0]                                              | 40.2 [33.4; 48.3]                                            | 23.4 [18.5; 27.9]                                          | 75.3 [69.0; 81.3]                        |
| Taichung           | Taiwan      | 2008-2014 | 93751    | 101.9 [78.9; 131.2]                                | 51.3 [37.3; 70.0]                                             | 30.3 [20.5; 42.7]                                              | 31.6 [24.0; 40.0]                                            | 24.4 [18.9; 27.9]                                          | 75.5 [71.5; 80.0]                        |
| Bristol            | UK          | 1993-2005 | 67017    | 56.0 [40.0; 69.0]                                  | 25.0 [19.0; 34.0]                                             | NA                                                             | NA                                                           | 11.2 [7.6; 15.4]                                           | 72.1 [62.4; 81.1]                        |
| Cardiff            | UK          | 1993-2006 | 45854    | 53.0 [38.0; 67.0]                                  | 27.0 [21.0; 36.0]                                             | NA                                                             | NA                                                           | 11.3 [7.7; 15.4]                                           | 71.8 [61.9; 81.2]                        |
| Greater London     | UK          | 1993-2006 | 835683   | 48.6 [32.3; 63.0]                                  | 24.2 [19.3; 32.3]                                             | NA                                                             | NA                                                           | 11.2 [7.2; 15.8]                                           | 70.5 [59.6; 80.5]                        |
| Greater Manchester | UK          | 1996-2006 | 171932   | 48.3 [35.7; 60.0]                                  | 22.3 [17.5; 30.2]                                             | NA                                                             | NA                                                           | 10.3 [6.5; 14.5]                                           | 75.2 [65.1; 84.0]                        |
| Kingston upon Hull | UK          | 1994-2002 | 30888    | 48.0 [35.0; 62.0]                                  | 27.0 [21.0; 35.0]                                             | NA                                                             | NA                                                           | 10.4 [6.4; 14.5]                                           | 80.7 [71.1; 88.7]                        |
| Leicester          | UK          | 1994-2006 | 55224    | 52.0 [36.0; 67.0]                                  | 21.0 [16.0; 28.0]                                             | NA                                                             | NA                                                           | 9.8 [5.7; 14.1]                                            | NA                                       |
| Liverpool          | UK          | 1993-2002 | 75858    | 54.0 [37.0; 66.0]                                  | 25.0 [20.0; 35.0]                                             | NA                                                             | NA                                                           | 10.2 [6.7; 14.2]                                           | 81.1 [73.1; 88.3]                        |
| Norwich            | UK          | 1997-2006 | 20082    | 59.0 [41.0; 75.0]                                  | 20.0 [16.0; 26.0]                                             | NA                                                             | NA                                                           | 10.3 [6.2; 14.8]                                           | 72.3 [62.2; 81.5]                        |
| Nottingham         | UK          | 1996-2006 | 56017    | 44.0 [30.0; 59.0]                                  | 23.0 [18.0; 30.0]                                             | NA                                                             | NA                                                           | 10 [5.9; 14.2]                                             | 77.1 [66.5; 86.7]                        |
| Sheffield          | UK          | 1996-2006 | 62836    | 49.5 [35.9; 62.0]                                  | 23.0 [17.0; 33.0]                                             | NA                                                             | NA                                                           | 10.2 [6.2; 14.5]                                           | 70.7 [60.4; 79.9]                        |
| Southampton        | UK          | 1994-2006 | 35500    | 51.0 [37.0; 64.0]                                  | 24.0 [19.0; 32.0]                                             | NA                                                             | NA                                                           | 11.9 [8.1; 16.1]                                           | 75.2 [64.7; 84.6]                        |
| The Potteries      | UK          | 1997-2006 | 39960    | 55.0 [41.0; 69.0]                                  | 21.0 [16.0; 28.0]                                             | NA                                                             | NA                                                           | 9.6 [5.8; 13.9]                                            | 85.2 [79.8; 92.7]                        |

| City           | Country | Period    | N deaths | Ozone ( $\mu\text{g}/\text{m}^3$ )<br>Median [IQR] | PM <sub>10</sub> ( $\mu\text{g}/\text{m}^3$ )<br>Median [IQR] | PM <sub>2.5</sub> ( $\mu\text{g}/\text{m}^3$ )<br>Median [IQR] | NO <sub>2</sub> ( $\mu\text{g}/\text{m}^3$ )<br>Median [IQR] | Mean temperature ( $^{\circ}\text{C}$ )<br>Median [IQR] | Relative humidity (%)<br>Median [IQR] |
|----------------|---------|-----------|----------|----------------------------------------------------|---------------------------------------------------------------|----------------------------------------------------------------|--------------------------------------------------------------|---------------------------------------------------------|---------------------------------------|
| Tyneside       | UK      | 1993-2006 | 98256    | 54.0 [40.0; 68.0]                                  | 20.0 [15.0; 28.0]                                             | NA                                                             | NA                                                           | 9.9 [6.3; 13.8]                                         | 71.4 [62.4; 80.3]                     |
| West Midlands  | UK      | 1993-2006 | 335592   | 54.4 [39.7; 66.9]                                  | 21.5 [16.3; 30.3]                                             | NA                                                             | NA                                                           | 10 [6; 14.2]                                            | 75.5 [64.6; 85.7]                     |
| West Yorkshire | UK      | 1993-2006 | 142586   | 46.5 [32.2; 59.5]                                  | 25.0 [19.0; 35.0]                                             | NA                                                             | NA                                                           | 9.6 [5.7; 13.8]                                         | 75.6 [65.6; 84.4]                     |
| Augusta        | USA     | 1989-2006 | 30967    | 94.6 [70.6; 118.0]                                 | 21.0 [14.0; 31.0]                                             | 15.7 [10.9; 21.2]                                              | NA                                                           | 18.9 [11.8; 24.6]                                       | 68.0 [55.9; 78.7]                     |
| Akron          | USA     | 1985-2006 | 107392   | 87.7 [60.3; 116.6]                                 | 21.2 [15.3; 29.8]                                             | 14.1 [9.8; 20.1]                                               | NA                                                           | 11.1 [2; 19.1]                                          | 72.0 [63.2; 80.2]                     |
| Albany         | USA     | 1987-2006 | 54560    | 65.9 [46.8; 88.0]                                  | 19.7 [14.0; 29.2]                                             | 8.9 [5.6; 14.9]                                                | 27.1 [18.2; 37.8]                                            | 9.8 [1.4; 18.5]                                         | 69.0 [59.9; 78.3]                     |
| Albuquerque    | USA     | 1985-2006 | 73279    | 84.3 [64.9; 102.7]                                 | 25.7 [17.9; 35.7]                                             | 5.9 [4.4; 8.1]                                                 | 31.4 [22.8; 42.8]                                            | 14.5 [6.3; 22.1]                                        | 38.7 [27.2; 51.8]                     |
| Allentown      | USA     | 1985-2006 | 61366    | 78.2 [50.3; 108.4]                                 | 21.1 [14.0; 31.8]                                             | 11.7 [7.4; 18.3]                                               | 30.8 [22.2; 42.0]                                            | 11.7 [3.3; 19.8]                                        | 66.7 [56.8; 76.6]                     |
| Anaheim        | USA     | 1985-2006 | 320343   | 77.8 [54.5; 99.4]                                  | 34.0 [24.7; 43.6]                                             | 13.0 [8.9; 19.4]                                               | 54.0 [38.2; 75.8]                                            | 18.8 [15.4; 22]                                         | 63.8 [52.7; 71.0]                     |
| AnnArbor       | USA     | 1985-2006 | 33609    | 87.5 [67.8; 109.0]                                 | 15.0 [10.0; 21.0]                                             | 11.5 [7.4; 18.1]                                               | NA                                                           | 10.1 [1.3; 18.8]                                        | 71.7 [63.2; 79.7]                     |
| Annandale      | USA     | 1985-2006 | 71093    | 67.9 [42.5; 103.8]                                 | 21.0 [14.4; 29.0]                                             | 12.1 [8.3; 17.6]                                               | 36.3 [27.0; 47.4]                                            | 14.6 [6.4; 22.6]                                        | 64.0 [53.2; 74.5]                     |
| Austin         | USA     | 1985-2006 | 69427    | 79.4 [62.2; 102.1]                                 | 20.7 [15.5; 27.0]                                             | 9.0 [6.5; 12.5]                                                | 14.8 [6.5; 31.4]                                             | 21.6 [14.8; 26.9]                                       | 66.5 [55.8; 76.3]                     |
| Atlantic City  | USA     | 1985-2006 | 49410    | 77.8 [56.1; 105.3]                                 | 27.0 [20.0; 36.0]                                             | 9.1 [6.5; 14.6]                                                | NA                                                           | 12.7 [5.1; 20.4]                                        | 71.1 [60.8; 81.4]                     |
| Atlanta        | USA     | 1985-2006 | 310249   | 95.5 [68.5; 124.7]                                 | 25.5 [18.2; 34.9]                                             | 16.1 [11.6; 21.5]                                              | 35.6 [26.0; 46.7]                                            | 17.2 [9.9; 23.6]                                        | 69.3 [59.6; 78.2]                     |
| Atzec          | USA     | 1997-2006 | 3858     | 94.6 [74.7; 111.5]                                 | 14.2 [10.4; 18.5]                                             | 5.5 [4.3; 7.3]                                                 | 18.2 [13.7; 24.6]                                            | 11.8 [3.3; 21.2]                                        | 39.3 [25.4; 55.8]                     |
| Buffalo        | USA     | 1985-2006 | 212201   | 68.4 [49.5; 94.1]                                  | 19.4 [13.9; 28.3]                                             | 11.1 [7.2; 17.1]                                               | 33.6 [25.1; 43.5]                                            | 9.3 [1.2; 18]                                           | 72.5 [64.5; 80.4]                     |
| Bakersfield    | USA     | 1985-2006 | 88852    | 106.0 [68.1; 143.7]                                | 36.6 [24.2; 52.5]                                             | 12.6 [8.4; 20.5]                                               | 31.7 [24.7; 42.0]                                            | 17.9 [11.8; 25.2]                                       | 50.3 [37.6; 68.9]                     |
| Boulder        | USA     | 1985-2006 | 24614    | 80.4 [57.3; 102.3]                                 | 20.6 [14.7; 28.9]                                             | 7.2 [5.5; 9.7]                                                 | NA                                                           | 12.2 [4.4; 20.3]                                        | 41.6 [30.9; 57.2]                     |
| Baltimore      | USA     | 1985-2006 | 319591   | 68.6 [42.7; 102.0]                                 | 27.2 [18.8; 38.3]                                             | 13.6 [8.9; 19.8]                                               | 45.5 [35.0; 57.4]                                            | 14.1 [5.9; 22.1]                                        | 64.5 [53.2; 75.9]                     |
| Bangor         | USA     | 1985-2006 | 26523    | 74.7 [58.6; 91.9]                                  | 16.9 [11.6; 25.0]                                             | 7.9 [5.4; 11.9]                                                | NA                                                           | 7.8 [-0.5; 16.4]                                        | 68.6 [58.3; 79.8]                     |
| Bergen         | USA     | 1985-2006 | 239023   | 58.7 [35.5; 87.0]                                  | 29.6 [21.0; 40.7]                                             | 10.8 [7.1; 17.6]                                               | 51.4 [38.0; 66.8]                                            | 12.8 [4.5; 20.8]                                        | 62.6 [51.4; 75.1]                     |
| Burlington     | USA     | 1985-2006 | 17292    | 78.6 [63.0; 97.0]                                  | 15.4 [10.7; 22.5]                                             | 6.9 [4.4; 11.2]                                                | 29.4 [22.8; 36.9]                                            | 8.6 [-0.2; 17.6]                                        | 67.7 [59.1; 76.5]                     |
| Birmingham     | USA     | 1985-2006 | 171109   | 83.5 [59.1; 109.9]                                 | 29.5 [19.2; 43.9]                                             | 14.5 [10.2; 20.9]                                              | 19.7 [14.2; 25.9]                                            | 18.3 [10.8; 24.4]                                       | 68.7 [58.6; 78.3]                     |

| City             | Country | Period    | N deaths | Ozone ( $\mu\text{g}/\text{m}^3$ )<br>Median [IQR] | PM <sub>10</sub> ( $\mu\text{g}/\text{m}^3$ )<br>Median [IQR] | PM <sub>2.5</sub> ( $\mu\text{g}/\text{m}^3$ )<br>Median [IQR] | NO <sub>2</sub> ( $\mu\text{g}/\text{m}^3$ )<br>Median [IQR] | Mean<br>temperature ( $^{\circ}\text{C}$ )<br>Median [IQR] | Relative<br>humidity (%)<br>Median [IQR] |
|------------------|---------|-----------|----------|----------------------------------------------------|---------------------------------------------------------------|----------------------------------------------------------------|--------------------------------------------------------------|------------------------------------------------------------|------------------------------------------|
| Barnstable       | USA     | 1987-2006 | 47369    | 87.0 [70.3; 108.8]                                 | NA                                                            | NA                                                             | 4.1 [1.7; 6.6]                                               | 10.5 [3.9; 18.2]                                           | 74.1 [62.1; 85.0]                        |
| Brownsville      | USA     | 1985-2006 | 36059    | 60.0 [42.4; 81.0]                                  | 22.3 [16.2; 31.1]                                             | 9.0 [6.6; 11.8]                                                | NA                                                           | 24.3 [19.7; 27.9]                                          | 76.0 [70.6; 82.0]                        |
| Boston           | USA     | 1985-2006 | 475683   | 58.1 [39.1; 82.2]                                  | 23.1 [17.1; 31.4]                                             | 10.4 [7.1; 15.5]                                               | 43.8 [33.4; 55.2]                                            | 10.7 [3.6; 18.7]                                           | 66.2 [53.7; 79.3]                        |
| Baton Rouge      | USA     | 1985-2006 | 62561    | 73.3 [53.3; 100.2]                                 | 26.4 [20.5; 35.0]                                             | 12.1 [9.1; 16.4]                                               | 24.6 [18.7; 32.8]                                            | 21.1 [14.4; 25.8]                                          | 74.5 [66.0; 82.0]                        |
| Cedar Rapids     | USA     | 1985-2006 | 28150    | 63.0 [45.3; 84.4]                                  | 24.3 [17.3; 33.4]                                             | 9.1 [5.8; 14.4]                                                | 6.9 [4.5; 9.3]                                               | 10.3 [0.6; 19.6]                                           | 73.4 [63.7; 82.2]                        |
| Chicago          | USA     | 1985-2006 | 1115158  | 56.0 [37.0; 79.5]                                  | 28.7 [20.2; 39.7]                                             | 13.8 [9.2; 19.4]                                               | 44.0 [35.0; 54.3]                                            | 11.4 [2.8; 20.7]                                           | 66.3 [56.8; 76.0]                        |
| Charlotte        | USA     | 1985-2006 | 82255    | 100.7 [72.8; 127.1]                                | 27.1 [19.6; 36.7]                                             | 14.1 [10.0; 19.2]                                              | 30.5 [21.7; 39.9]                                            | 17 [9.4; 23.4]                                             | 64.8 [53.5; 76.0]                        |
| Charleston SC    | USA     | 1987-2006 | 45917    | 74.5 [57.1; 95.1]                                  | 18.6 [14.0; 24.2]                                             | 11.0 [7.8; 15.2]                                               | 11.2 [7.0; 17.2]                                             | 19.6 [13.1; 25.1]                                          | 74.1 [64.0; 81.7]                        |
| Chattanooga      | USA     | 1985-2006 | 60219    | 90.8 [63.2; 115.9]                                 | 28.9 [20.0; 39.4]                                             | 13.2 [8.9; 18.1]                                               | NA                                                           | 16.8 [9; 23.4]                                             | 69.5 [60.2; 78.3]                        |
| Charlestown WV   | USA     | 1985-2006 | 49105    | 77.7 [46.6; 108.3]                                 | 22.0 [15.1; 31.1]                                             | 14.5 [10.1; 20.5]                                              | 39.5 [31.6; 48.5]                                            | 14.2 [5.8; 21]                                             | 71.3 [60.8; 80.1]                        |
| Columbus         | USA     | 1985-2006 | 159353   | 88.3 [61.2; 113.0]                                 | 25.8 [18.6; 36.4]                                             | 14.6 [10.3; 20.1]                                              | 46.1 [35.0; 59.4]                                            | 12.7 [3.6; 20.7]                                           | 68.5 [60.0; 77.0]                        |
| Colorado Springs | USA     | 1985-2006 | 51338    | 80.1 [61.7; 98.0]                                  | 19.5 [14.8; 26.6]                                             | 6.7 [5.4; 8.8]                                                 | 27.7 [20.9; 36.3]                                            | 9.7 [2.2; 17.6]                                            | 46.7 [34.5; 62.0]                        |
| Cleveland        | USA     | 1985-2006 | 404057   | 79.2 [59.1; 106.7]                                 | 28.2 [18.8; 41.4]                                             | 13.6 [8.7; 20.1]                                               | 41.9 [32.5; 53.6]                                            | 11.6 [2.9; 20.3]                                           | 69.9 [61.5; 78.2]                        |
| Cincinnati       | USA     | 1985-2006 | 171958   | 89.1 [63.1; 114.3]                                 | 26.9 [19.4; 37.3]                                             | 15.4 [10.9; 21.4]                                              | 46.1 [36.8; 56.6]                                            | 13.6 [4.9; 21.2]                                           | 70.6 [62.4; 78.6]                        |
| Canton           | USA     | 1985-2006 | 77288    | 93.3 [68.2; 118.6]                                 | 22.9 [16.6; 31.7]                                             | 15.2 [10.7; 21.3]                                              | 27.0 [17.6; 38.0]                                            | 10.9 [1.8; 19]                                             | 73.1 [64.2; 81.4]                        |
| Columbia         | USA     | 1985-2006 | 75994    | 82.0 [59.0; 109.4]                                 | 24.2 [15.0; 35.1]                                             | 13.1 [9.4; 17.7]                                               | 11.7 [7.4; 17.2]                                             | 18.6 [11.2; 24.8]                                          | 67.2 [56.7; 77.0]                        |
| Corpus Christi   | USA     | 1985-2006 | 45983    | 66.4 [48.0; 88.9]                                  | 26.0 [19.8; 34.0]                                             | 9.1 [6.8; 12.1]                                                | NA                                                           | 23.4 [17.9; 27.6]                                          | 76.2 [69.3; 82.6]                        |
| Davis            | USA     | 1985-2006 | 17954    | 98.0 [76.9; 117.6]                                 | 22.0 [14.0; 32.0]                                             | 6.8 [4.7; 10.5]                                                | 31.9 [22.2; 47.6]                                            | 10.2 [2.2; 19.7]                                           | 49.1 [33.1; 67.2]                        |
| Dallas           | USA     | 1985-2006 | 260718   | 74.2 [52.4; 102.7]                                 | 26.1 [19.4; 34.6]                                             | 11.3 [8.3; 15.8]                                               | 26.9 [19.3; 36.8]                                            | 20.5 [12.7; 27.1]                                          | 61.1 [51.4; 72.1]                        |
| Denver           | USA     | 1985-2006 | 182600   | 78.0 [56.3; 103.0]                                 | 25.1 [17.1; 35.2]                                             | 9.1 [7.0; 11.8]                                                | 41.8 [28.3; 58.5]                                            | 10.6 [3.1; 18.8]                                           | 46.5 [35.1; 62.2]                        |
| Dodge            | USA     | 1985-2006 | 11259    | 82.6 [64.7; 102.9]                                 | 14.4 [10.3; 20.4]                                             | 9.0 [5.7; 14.7]                                                | NA                                                           | 9.1 [0.3; 18.3]                                            | 71.6 [62.4; 80.5]                        |
| Dover            | USA     | 1985-2006 | 19772    | 93.3 [71.1; 120.8]                                 | 25.0 [19.0; 29.0]                                             | 10.8 [7.2; 16.5]                                               | NA                                                           | 13.6 [5.6; 21.4]                                           | 69.8 [59.4; 80.3]                        |
| Durham           | USA     | 1993-2006 | 21566    | 101.9 [77.7; 123.8]                                | 21.0 [15.0; 28.0]                                             | 13.1 [9.2; 17.9]                                               | 17.8 [13.0; 22.5]                                            | 16.3 [8.7; 23.1]                                           | 69.3 [58.5; 78.9]                        |

| City            | Country | Period    | N deaths | Ozone ( $\mu\text{g}/\text{m}^3$ )<br>Median [IQR] | PM <sub>10</sub> ( $\mu\text{g}/\text{m}^3$ )<br>Median [IQR] | PM <sub>2.5</sub> ( $\mu\text{g}/\text{m}^3$ )<br>Median [IQR] | NO <sub>2</sub> ( $\mu\text{g}/\text{m}^3$ )<br>Median [IQR] | Mean<br>temperature ( $^{\circ}\text{C}$ )<br>Median [IQR] | Relative<br>humidity (%)<br>Median [IQR] |
|-----------------|---------|-----------|----------|----------------------------------------------------|---------------------------------------------------------------|----------------------------------------------------------------|--------------------------------------------------------------|------------------------------------------------------------|------------------------------------------|
| DesMoines       | USA     | 1985-2006 | 54488    | 45.8 [22.8; 71.3]                                  | 25.9 [18.0; 37.6]                                             | 8.7 [5.8; 13.5]                                                | 20.5 [15.6; 27.5]                                            | 11.3 [1.4; 20.6]                                           | 69.3 [59.5; 78.3]                        |
| Detroit         | USA     | 1985-2006 | 729077   | 73.1 [51.5; 98.3]                                  | 29.0 [19.1; 43.5]                                             | 13.4 [8.7; 20.2]                                               | 35.2 [25.4; 46.6]                                            | 10.9 [2.1; 19.8]                                           | 66.7 [58.3; 75.5]                        |
| Davenport       | USA     | 1985-2006 | 55256    | 79.1 [57.7; 102.2]                                 | 26.3 [16.3; 39.5]                                             | 10.6 [6.9; 16.1]                                               | 10.3 [7.0; 14.7]                                             | 11.2 [1.5; 20]                                             | 71.3 [61.8; 80.1]                        |
| Daytona Beach   | USA     | 1992-2006 | 78470    | 74.8 [59.5; 93.1]                                  | 18.9 [14.8; 23.8]                                             | 8.7 [6.1; 12.1]                                                | NA                                                           | 22.7 [17.9; 25.9]                                          | 76.7 [69.8; 82.6]                        |
| Dayton          | USA     | 1985-2006 | 108776   | 90.9 [64.4; 115.6]                                 | 24.0 [17.3; 33.9]                                             | 14.5 [10.0; 20.4]                                              | NA                                                           | 12.6 [3.4; 20.6]                                           | 71.0 [62.1; 80.0]                        |
| El centro       | USA     | 1985-2006 | 16009    | 88.2 [69.8; 110.0]                                 | 49.0 [36.0; 66.1]                                             | 10.0 [7.1; 13.4]                                               | 21.5 [13.2; 35.8]                                            | 23.2 [16.1; 30.9]                                          | 36.1 [28.0; 45.0]                        |
| Elkhart         | USA     | 1992-2006 | 18913    | 92.4 [74.4; 112.7]                                 | NA                                                            | 12.7 [8.2; 19.0]                                               | NA                                                           | 12 [2.6; 21]                                               | 70.3 [60.7; 80.5]                        |
| El Paso         | USA     | 1985-2006 | 73269    | 78.9 [61.6; 99.0]                                  | 30.6 [20.3; 45.8]                                             | 9.0 [6.5; 12.5]                                                | 37.6 [27.3; 50.2]                                            | 19.3 [11.2; 25.7]                                          | 36.7 [25.7; 50.0]                        |
| Elizabeth       | USA     | 1985-1997 | 59658    | 62.5 [39.4; 91.8]                                  | 28.5 [20.5; 38.2]                                             | NA                                                             | 57.5 [44.9; 72.1]                                            | 13.3 [4.9; 21.8]                                           | 61.7 [51.2; 73.8]                        |
| Erie            | USA     | 1985-2006 | 54723    | 80.1 [59.8; 106.6]                                 | 16.7 [11.0; 25.4]                                             | 10.8 [7.2; 16.4]                                               | 24.7 [17.9; 33.0]                                            | 10.6 [2.1; 18.9]                                           | 71.0 [62.8; 79.3]                        |
| Essex           | USA     | 1985-2006 | 131712   | 70.8 [55.6; 89.8]                                  | 15.0 [11.0; 24.0]                                             | 8.0 [5.2; 12.9]                                                | 17.4 [10.8; 27.3]                                            | 10.3 [3; 18.3]                                             | 67.7 [55.1; 80.1]                        |
| Eugene          | USA     | 1985-2006 | 52763    | 71.5 [55.9; 88.9]                                  | 20.7 [12.9; 33.6]                                             | 6.7 [3.7; 11.5]                                                | NA                                                           | 11.2 [7; 16.3]                                             | 77.9 [66.5; 87.1]                        |
| Evansville      | USA     | 1985-2006 | 37519    | 102.4 [81.1; 124.1]                                | 26.4 [20.0; 35.7]                                             | 13.4 [9.4; 19.3]                                               | 20.6 [15.2; 27.7]                                            | 14.7 [5.7; 22.6]                                           | 70.4 [62.0; 78.7]                        |
| Fargo           | USA     | 1993-2006 | 9567     | 68.6 [53.7; 86.0]                                  | 14.1 [9.3; 22.5]                                              | 6.5 [4.5; 10.0]                                                | 10.8 [6.7; 16.4]                                             | 6.9 [-3.8; 17.5]                                           | 71.6 [62.1; 79.8]                        |
| Flint           | USA     | 1985-2006 | 75484    | 83.9 [65.0; 106.3]                                 | 19.0 [13.0; 28.0]                                             | 10.3 [6.0; 15.7]                                               | NA                                                           | 9.6 [0.8; 18.3]                                            | 72.7 [64.4; 80.4]                        |
| Fresno          | USA     | 1985-2006 | 104033   | 100.2 [63.7; 137.3]                                | 39.3 [26.5; 57.3]                                             | 13.4 [8.8; 24.0]                                               | 32.4 [23.9; 42.7]                                            | 17.4 [11.3; 24.7]                                          | 53.9 [40.3; 73.8]                        |
| Fort Lauderdale | USA     | 1985-2006 | 308032   | 63.4 [47.9; 80.5]                                  | 16.8 [13.4; 21.3]                                             | 7.5 [5.6; 10.2]                                                | 15.9 [9.7; 22.4]                                             | 25.7 [22.9; 27.9]                                          | 72.4 [66.0; 78.2]                        |
| Fort Myers      | USA     | 1985-2006 | 88850    | 72.5 [57.6; 89.8]                                  | 18.2 [14.4; 22.4]                                             | 8.1 [5.7; 10.7]                                                | NA                                                           | 24.4 [20.8; 26.9]                                          | 74.6 [67.9; 80.5]                        |
| Fort Pierce     | USA     | 1995-2006 | 41824    | 72.0 [55.1; 88.9]                                  | 17.2 [13.9; 22.1]                                             | 8.0 [5.5; 11.1]                                                | 17.3 [12.7; 23.5]                                            | 23.9 [20.2; 26.3]                                          | 76.9 [70.5; 82.0]                        |
| Fort Worth      | USA     | 1985-2006 | 172892   | 79.8 [59.5; 109.4]                                 | 21.1 [16.0; 28.6]                                             | 10.8 [7.8; 14.8]                                               | 25.2 [16.1; 36.4]                                            | 19.9 [11.9; 26.5]                                          | 61.9 [51.7; 72.9]                        |
| Fort Wayne      | USA     | 1985-2006 | 50899    | 97.7 [78.2; 118.6]                                 | 19.4 [13.8; 29.0]                                             | 12.2 [8.2; 17.9]                                               | 17.4 [10.8; 25.4]                                            | 11.2 [1.9; 19.6]                                           | 73.5 [64.7; 81.8]                        |
| Fayetteville    | USA     | 1985-2006 | 34790    | 101.9 [78.4; 125.0]                                | 23.0 [16.5; 31.0]                                             | 12.9 [9.2; 18.1]                                               | NA                                                           | 18.1 [10.4; 24.4]                                          | 65.8 [55.0; 76.2]                        |
| Gary            | USA     | 1985-2006 | 90669    | 89.7 [69.6; 115.2]                                 | 23.8 [15.8; 35.7]                                             | 13.9 [9.6; 19.2]                                               | 36.9 [27.7; 47.3]                                            | 12.1 [3.1; 21.1]                                           | 68.0 [59.3; 77.4]                        |

| City          | Country | Period    | N deaths | Ozone ( $\mu\text{g}/\text{m}^3$ )<br>Median [IQR] | PM <sub>10</sub> ( $\mu\text{g}/\text{m}^3$ )<br>Median [IQR] | PM <sub>2.5</sub> ( $\mu\text{g}/\text{m}^3$ )<br>Median [IQR] | NO <sub>2</sub> ( $\mu\text{g}/\text{m}^3$ )<br>Median [IQR] | Mean<br>temperature ( $^{\circ}\text{C}$ )<br>Median [IQR] | Relative<br>humidity (%)<br>Median [IQR] |
|---------------|---------|-----------|----------|----------------------------------------------------|---------------------------------------------------------------|----------------------------------------------------------------|--------------------------------------------------------------|------------------------------------------------------------|------------------------------------------|
| Greensburg    | USA     | 1985-2006 | 86732    | 82.2 [60.0; 105.8]                                 | 23.4 [17.2; 32.5]                                             | 13.5 [9.2; 19.6]                                               | 28.4 [21.1; 36.3]                                            | 13.3 [4.2; 21.3]                                           | 59.1 [49.8; 69.1]                        |
| Grand heaven  | USA     | 1989-2006 | 22493    | 90.7 [72.3; 114.7]                                 | 14.1 [10.3; 20.1]                                             | 11.2 [6.4; 17.5]                                               | 17.8 [14.2; 22.2]                                            | 9.2 [1.2; 17.9]                                            | 73.4 [65.2; 81.1]                        |
| Grand Junctio | USA     | 1986-1992 | 5209     | 89.4 [74.5; 101.9]                                 | 25.1 [18.9; 34.7]                                             | NA                                                             | NA                                                           | 12.6 [2.2; 21.3]                                           | 44.1 [27.6; 64.0]                        |
| Grand Rapids  | USA     | 1985-2006 | 78804    | 84.4 [65.0; 109.8]                                 | 20.0 [14.0; 28.9]                                             | 11.4 [7.0; 18.0]                                               | 27.8 [20.2; 37.0]                                            | 9.4 [0.7; 18.5]                                            | 72.7 [64.1; 81.0]                        |
| Greensboro    | USA     | 1985-2006 | 65906    | 106.8 [82.8; 128.1]                                | 22.5 [15.5; 31.0]                                             | 13.2 [9.1; 18.3]                                               | NA                                                           | 15.6 [7.9; 22.3]                                           | 66.9 [55.1; 77.8]                        |
| Gasinesville  | USA     | 1985-2006 | 27589    | 78.2 [59.7; 100.2]                                 | 17.1 [13.7; 21.7]                                             | 9.0 [6.6; 12.2]                                                | NA                                                           | 21.4 [16.2; 25.2]                                          | 76.2 [68.0; 83.1]                        |
| Gettysburg    | USA     | 2002-2006 | 4083     | 93.8 [73.3; 113.4]                                 | NA                                                            | 11.0 [7.0; 16.9]                                               | 5.7 [3.7; 8.4]                                               | 12.1 [3.8; 20.1]                                           | 70.5 [59.4; 80.3]                        |
| Holland       | USA     | 1990-2006 | 7264     | 94.3 [76.0; 121.0]                                 | 14.0 [8.0; 20.5]                                              | 9.9 [5.7; 16.3]                                                | 13.9 [9.2; 20.1]                                             | 9.4 [1.6; 18.3]                                            | 73.6 [65.1; 81.2]                        |
| Harrisburg    | USA     | 1985-2006 | 49992    | 79.4 [52.6; 108.9]                                 | 19.9 [13.1; 28.6]                                             | 13.4 [8.4; 20.3]                                               | 33.4 [24.0; 44.4]                                            | 12.9 [4.2; 21.1]                                           | 64.0 [53.0; 75.6]                        |
| Hartford      | USA     | 1985-2006 | 159050   | 76.2 [55.1; 98.2]                                  | 16.7 [11.2; 25.9]                                             | 9.3 [6.2; 14.9]                                                | 32.4 [22.6; 44.6]                                            | 11.7 [3.4; 19.8]                                           | 65.7 [54.2; 77.2]                        |
| Houston       | USA     | 1985-2006 | 366340   | 66.4 [47.8; 95.8]                                  | 27.0 [19.1; 36.9]                                             | 12.1 [9.0; 15.8]                                               | 32.5 [23.4; 43.8]                                            | 22.2 [16.3; 26.9]                                          | 75.3 [66.6; 82.3]                        |
| Indianapolis  | USA     | 1985-2006 | 149459   | 98.9 [77.2; 121.5]                                 | 27.0 [19.1; 38.0]                                             | 14.6 [10.0; 20.3]                                              | 33.7 [25.6; 42.9]                                            | 12.9 [3.5; 21.1]                                           | 71.2 [62.1; 80.0]                        |
| Iowa city     | USA     | 1985-1991 | 2871     | 68.6 [50.0; 90.6]                                  | NA                                                            | NA                                                             | NA                                                           | 10.4 [0.5; 19.9]                                           | 71.4 [61.6; 80.4]                        |
| Jacksonville  | USA     | 1985-2006 | 124017   | 77.3 [59.6; 99.0]                                  | 26.0 [20.0; 33.0]                                             | 9.6 [6.8; 13.0]                                                | 26.4 [19.9; 34.3]                                            | 22.4 [16.9; 26.5]                                          | 69.3 [61.2; 76.6]                        |
| Jersey city   | USA     | 1985-2006 | 103084   | 60.0 [36.3; 90.9]                                  | 28.5 [20.0; 39.6]                                             | 12.8 [8.3; 19.6]                                               | 49.7 [37.4; 64.0]                                            | 10.3 [3.6; 17.7]                                           | 73.8 [62.6; 84.3]                        |
| Kalamazoo     | USA     | 1991-2006 | 26670    | 84.8 [61.4; 106.3]                                 | 16.0 [10.0; 24.5]                                             | 11.9 [7.2; 18.7]                                               | 25.0 [18.6; 32.6]                                            | 10.6 [1.6; 19.6]                                           | 70.3 [60.7; 78.9]                        |
| Kenosha       | USA     | 1985-2006 | 23194    | 89.5 [70.8; 114.7]                                 | NA                                                            | 9.8 [6.0; 15.5]                                                | 25.6 [16.0; 38.3]                                            | 10 [1.6; 18.9]                                             | 72.3 [63.9; 80.6]                        |
| Kansas        | USA     | 1985-2006 | 218933   | 63.0 [39.2; 91.9]                                  | 29.2 [21.0; 40.1]                                             | 10.8 [7.4; 15.2]                                               | 24.1 [17.0; 32.6]                                            | 14.8 [5.2; 23]                                             | 64.6 [55.4; 74.3]                        |
| Knoxville     | USA     | 1985-2006 | 80418    | 91.3 [71.0; 115.0]                                 | 27.0 [19.0; 36.5]                                             | 14.5 [10.1; 20.0]                                              | 6.0 [2.6; 15.2]                                              | 15.9 [7.9; 22.8]                                           | 70.9 [61.6; 79.5]                        |
| La Fayette LA | USA     | 1985-2006 | 24508    | 76.0 [56.4; 101.7]                                 | 18.0 [14.0; 24.0]                                             | 10.1 [7.3; 13.9]                                               | NA                                                           | 21.4 [14.9; 26]                                            | 76.2 [67.5; 83.3]                        |
| Lake Charles  | USA     | 1985-2006 | 31479    | 74.1 [55.9; 97.0]                                  | 19.0 [14.0; 26.0]                                             | 9.9 [7.2; 13.7]                                                | 10.1 [7.0; 14.1]                                             | 22.5 [16.1; 27.2]                                          | 71.6 [61.4; 80.7]                        |
| Lakeland      | USA     | 1992-2006 | 70007    | 75.1 [58.2; 94.7]                                  | 19.7 [15.7; 24.6]                                             | 9.3 [6.6; 12.6]                                                | NA                                                           | 24.7 [20.4; 27.5]                                          | 66.7 [58.8; 74.0]                        |
| Lancaster     | USA     | 1985-2006 | 80724    | 83.3 [53.4; 114.0]                                 | 19.8 [13.5; 28.6]                                             | 14.3 [9.5; 21.5]                                               | 29.0 [20.9; 38.2]                                            | 12.6 [4.1; 20.9]                                           | 65.6 [55.1; 76.9]                        |



| City        | Country | Period    | N deaths | Ozone ( $\mu\text{g}/\text{m}^3$ )<br>Median [IQR] | PM <sub>10</sub> ( $\mu\text{g}/\text{m}^3$ )<br>Median [IQR] | PM <sub>2.5</sub> ( $\mu\text{g}/\text{m}^3$ )<br>Median [IQR] | NO <sub>2</sub> ( $\mu\text{g}/\text{m}^3$ )<br>Median [IQR] | Mean<br>temperature ( $^{\circ}\text{C}$ )<br>Median [IQR] | Relative<br>humidity (%)<br>Median [IQR] |
|-------------|---------|-----------|----------|----------------------------------------------------|---------------------------------------------------------------|----------------------------------------------------------------|--------------------------------------------------------------|------------------------------------------------------------|------------------------------------------|
| Louisville  | USA     | 1985-2006 | 139347   | 80.4 [52.7; 108.4]                                 | 23.5 [17.0; 33.1]                                             | 14.1 [9.9; 19.5]                                               | 34.3 [26.3; 44.7]                                            | 15.3 [6.4; 22.9]                                           | 67.1 [57.9; 76.6]                        |
| LaPorte     | USA     | 1990-2006 | 15900    | 95.1 [76.3; 118.3]                                 | 18.5 [12.8; 24.0]                                             | 11.8 [7.3; 17.1]                                               | NA                                                           | 10.7 [1.7; 19.3]                                           | 72.7 [63.5; 81.3]                        |
| Los Angeles | USA     | 1985-2006 | 1239036  | 80.3 [49.5; 115.5]                                 | 34.3 [25.4; 43.5]                                             | 15.8 [11.1; 22.2]                                              | 63.6 [48.1; 81.9]                                            | 17.9 [15.2; 20.2]                                          | 71.0 [60.9; 77.8]                        |
| Las Vegas   | USA     | 1985-2006 | 182220   | 86.0 [63.1; 108.4]                                 | 31.9 [23.2; 42.0]                                             | 6.5 [4.4; 9.1]                                                 | 30.6 [18.7; 54.1]                                            | 20.3 [11.9; 29.3]                                          | 25.7 [18.0; 37.2]                        |
| Little Rock | USA     | 1985-2006 | 63901    | 76.7 [56.6; 101.8]                                 | 25.7 [18.8; 34.8]                                             | 12.8 [9.2; 17.8]                                               | 19.0 [13.4; 26.6]                                            | 17.9 [9.7; 24.7]                                           | 68.9 [59.4; 78.1]                        |
| Macon       | USA     | 1997-2006 | 15318    | 98.7 [76.5; 122.7]                                 | 26.0 [17.0; 36.0]                                             | 14.1 [10.3; 19.0]                                              | NA                                                           | 18.8 [11.9; 24.8]                                          | 69.4 [59.2; 78.0]                        |
| Mc Allen    | USA     | 1996-2006 | 29196    | 64.6 [49.6; 81.6]                                  | 25.0 [18.9; 34.3]                                             | 9.5 [7.2; 12.5]                                                | NA                                                           | 25 [19.9; 28.7]                                            | 68.4 [61.4; 76.0]                        |
| Middlesex   | USA     | 1985-2006 | 110324   | 68.6 [45.6; 101.2]                                 | 22.2 [16.5; 30.7]                                             | 9.7 [6.4; 15.4]                                                | 31.4 [22.3; 43.9]                                            | 12.9 [4.6; 21.1]                                           | 63.2 [51.7; 75.5]                        |
| Middletown  | USA     | 1985-2006 | 49618    | 89.7 [63.0; 115.4]                                 | 27.5 [19.4; 40.4]                                             | 14.5 [10.3; 20.4]                                              | NA                                                           | 13.4 [4.6; 21.1]                                           | 69.8 [61.4; 78.0]                        |
| Medford     | USA     | 1985-2006 | 33409    | 83.5 [67.6; 102.5]                                 | 28.5 [18.8; 43.7]                                             | 7.4 [4.5; 12.3]                                                | NA                                                           | 12 [6.4; 18.9]                                             | 62.6 [47.5; 79.9]                        |
| Madison IL  | USA     | 1985-2006 | 48230    | 69.0 [46.1; 98.0]                                  | 33.8 [21.4; 51.7]                                             | 15.3 [10.3; 20.5]                                              | NA                                                           | 15.6 [6.1; 23.6]                                           | 66.5 [56.1; 76.5]                        |
| Modesto     | USA     | 1985-2006 | 63591    | 80.4 [52.2; 111.5]                                 | 31.9 [22.6; 45.3]                                             | 11.0 [8.0; 20.0]                                               | 32.9 [25.0; 42.5]                                            | 17.9 [11.7; 24.2]                                          | 54.3 [40.9; 71.3]                        |
| Madison WI  | USA     | 1985-2006 | 48763    | 83.1 [62.5; 102.4]                                 | 21.0 [14.5; 29.0]                                             | 10.2 [6.6; 16.1]                                               | NA                                                           | 9.3 [0.1; 18.4]                                            | 70.5 [61.7; 78.8]                        |
| Miami       | USA     | 1985-2006 | 372130   | 65.1 [49.8; 82.7]                                  | 24.6 [19.9; 30.4]                                             | 8.4 [6.3; 11.3]                                                | 18.6 [12.8; 27.5]                                            | 25.4 [22.8; 27.7]                                          | 72.7 [67.2; 78.0]                        |
| Melbourn    | USA     | 1988-2006 | 80122    | 75.0 [59.3; 91.9]                                  | 16.5 [13.0; 20.9]                                             | 7.5 [5.1; 10.4]                                                | NA                                                           | 23.9 [20.1; 26.6]                                          | 76.0 [70.0; 81.3]                        |
| Milwaukee   | USA     | 1985-2006 | 232056   | 76.2 [56.5; 98.4]                                  | 25.1 [17.3; 35.3]                                             | 11.2 [7.1; 17.3]                                               | 36.3 [26.9; 47.4]                                            | 9.2 [1.1; 18.4]                                            | 70.4 [61.7; 79.2]                        |
| Memphis     | USA     | 1985-2006 | 152003   | 101.4 [78.9; 124.2]                                | 24.2 [17.5; 32.7]                                             | 12.1 [8.6; 16.7]                                               | 44.1 [31.9; 57.6]                                            | 18.4 [10.1; 25.2]                                          | 65.5 [55.9; 75.8]                        |
| Monmouth    | USA     | 1985-2006 | 235036   | 89.1 [64.2; 117.4]                                 | NA                                                            | 9.0 [6.0; 13.9]                                                | NA                                                           | 13.6 [5.7; 21.6]                                           | 60.7 [49.6; 73.1]                        |
| Montgomery  | USA     | 1986-2006 | 38531    | 87.5 [66.2; 110.0]                                 | 21.0 [15.3; 28.0]                                             | 13.0 [9.9; 18.5]                                               | 19.3 [14.3; 25.2]                                            | 20.7 [13.7; 26.6]                                          | 66.0 [56.0; 76.1]                        |
| Mobile      | USA     | 1985-2006 | 72746    | 79.7 [59.7; 102.3]                                 | 25.9 [19.1; 34.7]                                             | 11.4 [8.5; 16.0]                                               | NA                                                           | 21.4 [15.1; 26.4]                                          | 72.6 [61.3; 81.8]                        |
| Monroe      | USA     | 1985-2006 | 26416    | 78.9 [59.3; 103.4]                                 | 25.0 [17.0; 37.0]                                             | 10.7 [7.6; 15.4]                                               | 16.0 [11.6; 21.9]                                            | 19.7 [12.2; 25.6]                                          | 72.8 [64.0; 80.8]                        |
| Mercer      | USA     | 1985-2006 | 27870    | 81.8 [57.1; 111.5]                                 | 30.0 [22.0; 42.0]                                             | 11.9 [8.1; 17.3]                                               | NA                                                           | 10.3 [1.3; 18.2]                                           | 71.3 [61.9; 79.9]                        |
| Marlboro    | USA     | 1985-2006 | 81024    | 87.0 [56.8; 121.5]                                 | 20.4 [14.0; 29.5]                                             | 11.8 [8.1; 17.3]                                               | 18.1 [13.2; 25.6]                                            | 13.9 [5.8; 21.7]                                           | 66.3 [55.6; 77.5]                        |

| City         | Country | Period    | N deaths | Ozone ( $\mu\text{g}/\text{m}^3$ )<br>Median [IQR] | PM <sub>10</sub> ( $\mu\text{g}/\text{m}^3$ )<br>Median [IQR] | PM <sub>2.5</sub> ( $\mu\text{g}/\text{m}^3$ )<br>Median [IQR] | NO <sub>2</sub> ( $\mu\text{g}/\text{m}^3$ )<br>Median [IQR] | Mean<br>temperature ( $^{\circ}\text{C}$ )<br>Median [IQR] | Relative<br>humidity (%)<br>Median [IQR] |
|--------------|---------|-----------|----------|----------------------------------------------------|---------------------------------------------------------------|----------------------------------------------------------------|--------------------------------------------------------------|------------------------------------------------------------|------------------------------------------|
| Muskegon     | USA     | 1985-2006 | 30902    | 89.9 [71.1; 116.4]                                 | 25.8 [17.6; 39.0]                                             | 9.8 [5.4; 16.1]                                                | NA                                                           | 9.3 [1.1; 18]                                              | 73.1 [64.7; 80.9]                        |
| Muncie       | USA     | 2001-2006 | 6539     | 100.7 [82.6; 119.3]                                | NA                                                            | 12.3 [8.2; 17.0]                                               | NA                                                           | 12.3 [2.9; 20.1]                                           | 72.8 [63.8; 82.0]                        |
| Nashua       | USA     | 1985-2006 | 51115    | 77.2 [58.8; 97.0]                                  | 16.2 [11.0; 23.5]                                             | 7.5 [4.9; 12.2]                                                | 24.9 [16.3; 35.9]                                            | 11.1 [2.6; 19.9]                                           | 60.1 [48.9; 73.7]                        |
| Nassau       | USA     | 1985-2006 | 460192   | 64.9 [45.1; 90.5]                                  | 17.3 [12.3; 24.1]                                             | 9.8 [6.2; 15.2]                                                | 44.1 [31.6; 58.7]                                            | 12.2 [4.7; 20.3]                                           | 66.6 [55.0; 79.6]                        |
| Niles        | USA     | 1991-2006 | 22196    | 99.0 [80.6; 122.7]                                 | NA                                                            | 10.2 [6.0; 16.1]                                               | 12.4 [10.2; 14.9]                                            | 10.5 [1.6; 19.2]                                           | 72.1 [63.5; 80.3]                        |
| Nashville    | USA     | 1985-2006 | 97358    | 65.5 [41.0; 92.7]                                  | 29.2 [21.6; 39.7]                                             | 12.5 [9.0; 17.4]                                               | 25.9 [16.6; 36.3]                                            | 16.7 [8.3; 23.7]                                           | 66.6 [57.3; 76.1]                        |
| Newburgh     | USA     | 1995-2006 | 27492    | 90.6 [69.8; 110.7]                                 | NA                                                            | 8.9 [5.9; 14.4]                                                | NA                                                           | 10.9 [2.5; 19]                                             | 64.6 [54.9; 76.0]                        |
| Newhaven     | USA     | 1985-2006 | 157415   | 79.9 [61.6; 102.3]                                 | 23.4 [15.3; 34.8]                                             | 11.4 [7.6; 17.5]                                               | 45.8 [34.0; 58.9]                                            | 12.1 [4.6; 20.2]                                           | 72.6 [59.6; 83.1]                        |
| Newlond      | USA     | 1985-2006 | 40419    | 92.6 [75.2; 115.2]                                 | 15.2 [11.0; 21.6]                                             | 8.9 [6.0; 14.4]                                                | NA                                                           | 11.5 [4.4; 19.1]                                           | 72.2 [59.0; 84.5]                        |
| New Orleans  | USA     | 1985-1989 | 41816    | 73.0 [50.4; 103.2]                                 | 30.9 [22.0; 41.8]                                             | NA                                                             | 34.6 [26.9; 44.3]                                            | 21.9 [15.8; 26.6]                                          | 75.4 [68.0; 82.7]                        |
| Newark       | USA     | 1985-2006 | 220980   | 66.4 [45.3; 95.1]                                  | 31.4 [22.0; 43.5]                                             | 10.3 [6.7; 16.4]                                               | 44.3 [32.8; 57.9]                                            | 13.3 [5.2; 21.7]                                           | 61.5 [51.1; 73.7]                        |
| New York     | USA     | 1985-2006 | 1367085  | 50.5 [30.9; 77.8]                                  | 22.3 [16.3; 31.6]                                             | 12.4 [8.2; 18.5]                                               | 65.8 [53.3; 81.1]                                            | 10.2 [3.5; 17.7]                                           | 73.8 [62.7; 84.3]                        |
| Ocala        | USA     | 1998-2006 | 29695    | 77.7 [61.2; 97.5]                                  | NA                                                            | 9.4 [6.8; 12.7]                                                | NA                                                           | 22 [16.8; 25.4]                                            | 70.9 [62.2; 78.1]                        |
| Oklahoma     | USA     | 1985-2006 | 118753   | 80.1 [58.6; 105.2]                                 | 21.6 [15.7; 30.0]                                             | 8.3 [5.9; 12.1]                                                | 20.9 [14.9; 29.9]                                            | 16.8 [8.1; 24.3]                                           | 62.8 [52.6; 74.0]                        |
| Oakland      | USA     | 1985-2006 | 325028   | 60.7 [46.0; 74.1]                                  | 19.9 [14.2; 28.2]                                             | 9.1 [5.8; 15.3]                                                | 30.9 [22.0; 41.1]                                            | 14.4 [11.9; 16.4]                                          | 77.8 [70.3; 83.4]                        |
| Omaha        | USA     | 1985-2006 | 71558    | 64.7 [47.0; 84.4]                                  | 33.3 [24.2; 45.9]                                             | 8.7 [6.0; 12.9]                                                | NA                                                           | 11.6 [1.7; 20.7]                                           | 68.7 [59.3; 77.5]                        |
| Orlando      | USA     | 1985-2006 | 157019   | 76.9 [60.5; 97.1]                                  | 19.0 [14.9; 23.9]                                             | 9.1 [6.7; 12.3]                                                | 19.7 [14.1; 26.9]                                            | 23.4 [19.3; 26.4]                                          | 73.3 [66.0; 79.9]                        |
| Philadelphia | USA     | 1985-2006 | 911888   | 64.3 [40.1; 99.3]                                  | 24.2 [17.7; 34.2]                                             | 12.2 [8.1; 18.1]                                               | 46.1 [35.8; 57.7]                                            | 13.1 [5.1; 21.2]                                           | 66.1 [56.2; 77.0]                        |
| Phoenix      | USA     | 1985-2006 | 386802   | 89.1 [63.3; 110.4]                                 | 42.8 [30.9; 57.7]                                             | 9.3 [7.1; 13.3]                                                | 42.9 [30.4; 57.8]                                            | 24.1 [16.1; 31.9]                                          | 28.9 [20.3; 41.2]                        |
| Palm beach   | USA     | 1985-2006 | 233887   | 62.0 [46.9; 79.0]                                  | 18.9 [15.1; 24.0]                                             | 7.2 [5.2; 9.8]                                                 | 23.6 [17.1; 30.8]                                            | 24.9 [22; 27.2]                                            | 74.5 [68.5; 79.8]                        |
| Plymouth     | USA     | 1987-1997 | 37343    | 70.6 [53.2; 93.8]                                  | NA                                                            | NA                                                             | NA                                                           | 10.7 [3.1; 18.4]                                           | 64.8 [53.8; 77.4]                        |
| Pensacola    | USA     | 1985-2006 | 50546    | 82.1 [62.9; 105.0]                                 | 19.7 [15.2; 25.5]                                             | 10.8 [7.8; 15.4]                                               | 13.1 [9.0; 18.4]                                             | 21.2 [15.2; 26.2]                                          | 76.3 [65.6; 84.0]                        |
| Portland OR  | USA     | 1985-2006 | 210301   | 63.8 [49.5; 80.2]                                  | 20.1 [13.7; 29.1]                                             | 7.4 [5.0; 11.1]                                                | 26.9 [20.4; 35.8]                                            | 11.9 [7.4; 17.3]                                           | 73.0 [62.3; 82.9]                        |

| City           | Country | Period    | N deaths | Ozone ( $\mu\text{g}/\text{m}^3$ )<br>Median [IQR] | PM <sub>10</sub> ( $\mu\text{g}/\text{m}^3$ )<br>Median [IQR] | PM <sub>2.5</sub> ( $\mu\text{g}/\text{m}^3$ )<br>Median [IQR] | NO <sub>2</sub> ( $\mu\text{g}/\text{m}^3$ )<br>Median [IQR] | Mean<br>temperature ( $^{\circ}\text{C}$ )<br>Median [IQR] | Relative<br>humidity (%)<br>Median [IQR] |
|----------------|---------|-----------|----------|----------------------------------------------------|---------------------------------------------------------------|----------------------------------------------------------------|--------------------------------------------------------------|------------------------------------------------------------|------------------------------------------|
| Port Arthur    | USA     | 1985-2006 | 50969    | 70.4 [50.0; 97.4]                                  | 20.0 [14.0; 26.0]                                             | 10.0 [7.3; 13.7]                                               | 14.3 [7.7; 21.5]                                             | 21.6 [15.4; 26.5]                                          | 78.7 [70.4; 85.0]                        |
| Portage        | USA     | 1985-2006 | 20147    | 86.9 [65.2; 111.5]                                 | 17.5 [12.0; 25.1]                                             | 11.7 [7.5; 16.9]                                               | NA                                                           | 12.1 [3.1; 21.1]                                           | 68.0 [59.3; 77.4]                        |
| Portland ME    | USA     | 1985-2006 | 46217    | 74.7 [59.5; 93.4]                                  | 18.8 [13.5; 26.4]                                             | 8.9 [6.3; 13.9]                                                | 26.7 [17.9; 36.7]                                            | 8.4 [0.9; 16.6]                                            | 69.4 [58.0; 81.2]                        |
| Providence     | USA     | 1985-2006 | 254651   | 83.5 [64.9; 104.4]                                 | 22.5 [16.2; 31.7]                                             | 9.1 [6.4; 13.7]                                                | 30.0 [19.2; 43.4]                                            | 11 [3.6; 19]                                               | 68.0 [55.8; 80.4]                        |
| Pittsburg      | USA     | 1985-2006 | 317935   | 63.4 [40.0; 96.8]                                  | 24.4 [15.2; 38.6]                                             | 13.2 [8.2; 20.6]                                               | 44.7 [33.9; 56.4]                                            | 12.3 [3.3; 20]                                             | 68.2 [58.4; 77.8]                        |
| Richmond       | USA     | 1985-2006 | 116646   | 93.7 [64.7; 119.4]                                 | 21.0 [15.0; 29.3]                                             | 12.4 [8.6; 17.6]                                               | 38.8 [28.9; 49.5]                                            | 15.3 [7.5; 22.7]                                           | 67.6 [56.8; 78.4]                        |
| Rochester      | USA     | 1985-2006 | 127040   | 62.5 [45.3; 84.8]                                  | 19.5 [13.9; 28.0]                                             | 9.2 [5.9; 14.8]                                                | NA                                                           | 9.5 [1.2; 18.1]                                            | 71.8 [63.9; 79.4]                        |
| Rockville      | USA     | 1985-2006 | 92381    | 89.7 [60.0; 120.5]                                 | 23.0 [16.0; 32.0]                                             | 10.8 [7.5; 16.4]                                               | NA                                                           | 14.7 [6.6; 22.8]                                           | 65.1 [54.0; 76.1]                        |
| Reading        | USA     | 1985-2006 | 72337    | 77.4 [51.2; 106.8]                                 | 20.1 [14.3; 28.2]                                             | 13.7 [8.7; 20.4]                                               | 38.6 [30.2; 47.8]                                            | 12.7 [4.2; 20.9]                                           | 65.6 [55.1; 76.0]                        |
| Reno           | USA     | 1985-2006 | 45340    | 78.7 [57.8; 98.5]                                  | 33.0 [22.0; 49.5]                                             | 6.5 [4.6; 9.0]                                                 | 26.2 [14.1; 43.0]                                            | 11.3 [4.5; 19.6]                                           | 41.5 [29.6; 57.5]                        |
| Raleigh        | USA     | 1985-2006 | 58561    | 97.3 [71.0; 123.5]                                 | 20.3 [14.8; 27.3]                                             | 13.1 [9.3; 18.0]                                               | 22.3 [15.5; 32.1]                                            | 16.4 [8.8; 23.1]                                           | 68.7 [57.7; 78.6]                        |
| Riverside      | USA     | 1985-2006 | 433285   | 101.5 [69.2; 139.7]                                | 36.3 [25.9; 46.5]                                             | 15.3 [9.6; 23.2]                                               | 43.7 [33.5; 54.5]                                            | 17.1 [13; 22.1]                                            | 56.5 [42.0; 68.6]                        |
| Sacramento     | USA     | 1985-2006 | 172136   | 80.6 [55.7; 105.7]                                 | 22.9 [16.4; 31.4]                                             | 9.1 [6.0; 14.4]                                                | 26.2 [18.8; 35.9]                                            | 15.8 [10.8; 20.8]                                          | 64.5 [51.9; 77.8]                        |
| Scranton       | USA     | 1985-2006 | 150119   | 77.5 [56.3; 102.2]                                 | 17.9 [11.9; 26.9]                                             | 10.0 [6.0; 16.2]                                               | 28.5 [20.1; 39.0]                                            | 10.7 [2.2; 18.7]                                           | 67.9 [58.4; 77.5]                        |
| San Diego      | USA     | 1985-2006 | 369956   | 87.5 [70.5; 105.1]                                 | 31.6 [24.0; 40.5]                                             | 11.4 [8.1; 16.1]                                               | 37.9 [27.9; 51.4]                                            | 17.8 [14.8; 20.6]                                          | 68.4 [59.5; 74.5]                        |
| San Francisco  | USA     | 1985-2006 | 248607   | 47.9 [35.2; 61.2]                                  | 22.6 [15.6; 32.5]                                             | 9.1 [5.8; 14.4]                                                | 34.9 [23.6; 50.1]                                            | 14.6 [12.2; 16.6]                                          | 75.4 [68.3; 81.5]                        |
| Salt Lake      | USA     | 1985-2006 | 89770    | 94.9 [71.8; 114.5]                                 | 29.8 [19.5; 43.1]                                             | 7.7 [5.6; 11.9]                                                | 47.4 [34.8; 63.6]                                            | 11.2 [3.3; 21]                                             | 52.1 [36.2; 69.4]                        |
| San Jose       | USA     | 1985-2006 | 176066   | 61.7 [44.3; 77.4]                                  | 25.1 [17.3; 35.4]                                             | 9.9 [6.4; 16.8]                                                | 42.8 [31.0; 57.4]                                            | 17.2 [13.2; 21.1]                                          | 59.7 [50.9; 68.8]                        |
| San Antonio    | USA     | 1985-2006 | 186461   | 78.3 [62.8; 99.7]                                  | 22.0 [16.0; 29.5]                                             | 8.7 [6.4; 12.1]                                                | 16.6 [11.4; 24.3]                                            | 22.5 [15.7; 27.7]                                          | 65.4 [55.0; 75.6]                        |
| Spokane        | USA     | 1985-2006 | 68681    | 87.0 [73.3; 100.7]                                 | 24.1 [14.3; 38.3]                                             | 7.4 [4.5; 11.4]                                                | NA                                                           | 9.2 [2.9; 16.6]                                            | 65.2 [50.0; 80.5]                        |
| Springfield MA | USA     | 1985-2006 | 94971    | 70.2 [51.0; 93.4]                                  | 23.2 [16.4; 32.8]                                             | 10.0 [6.5; 15.7]                                               | 31.4 [21.9; 44.8]                                            | 10.9 [2.2; 19.2]                                           | 64.3 [54.1; 76.0]                        |
| Springfield MO | USA     | 1985-2006 | 43239    | 78.3 [56.9; 99.0]                                  | 18.0 [13.0; 25.0]                                             | 11.0 [7.5; 14.7]                                               | 19.8 [12.9; 27.6]                                            | 14.6 [5.7; 22]                                             | 69.2 [59.6; 78.5]                        |
| Spartanburg    | USA     | 1990-2006 | 37387    | 90.9 [61.2; 118.6]                                 | 21.0 [16.0; 28.0]                                             | 13.1 [9.1; 18.2]                                               | NA                                                           | 16.7 [9.3; 22.9]                                           | 67.7 [55.3; 79.0]                        |

| City           | Country | Period    | N deaths | Ozone ( $\mu\text{g}/\text{m}^3$ )<br>Median [IQR] | PM <sub>10</sub> ( $\mu\text{g}/\text{m}^3$ )<br>Median [IQR] | PM <sub>2.5</sub> ( $\mu\text{g}/\text{m}^3$ )<br>Median [IQR] | NO <sub>2</sub> ( $\mu\text{g}/\text{m}^3$ )<br>Median [IQR] | Mean<br>temperature ( $^{\circ}\text{C}$ )<br>Median [IQR] | Relative<br>humidity (%)<br>Median [IQR] |
|----------------|---------|-----------|----------|----------------------------------------------------|---------------------------------------------------------------|----------------------------------------------------------------|--------------------------------------------------------------|------------------------------------------------------------|------------------------------------------|
| Sarasota       | USA     | 1985-2006 | 151551   | 75.1 [58.7; 94.6]                                  | 19.9 [15.6; 24.6]                                             | 8.5 [6.0; 11.8]                                                | 8.7 [5.5; 13.3]                                              | 24.1 [20.1; 27.1]                                          | 76.1 [69.3; 81.8]                        |
| Steubenville   | USA     | 1985-2006 | 21002    | 71.1 [45.3; 101.9]                                 | 28.6 [19.6; 42.6]                                             | 14.7 [10.4; 21.6]                                              | 33.8 [26.2; 43.3]                                            | 12.6 [3.6; 20.4]                                           | 67.3 [56.5; 77.4]                        |
| Saint Charles  | USA     | 1985-2006 | 28225    | 87.5 [59.6; 114.7]                                 | 20.0 [13.0; 28.0]                                             | 12.3 [8.0; 17.4]                                               | 17.0 [10.3; 25.2]                                            | 15 [5.4; 23.2]                                             | 65.1 [55.2; 75.3]                        |
| Stockton       | USA     | 1985-2006 | 82225    | 72.9 [49.0; 97.7]                                  | 26.5 [18.6; 37.2]                                             | 11.0 [7.0; 17.0]                                               | 35.7 [26.6; 46.1]                                            | 16.3 [11; 21.8]                                            | 60.7 [47.7; 76.2]                        |
| South bend     | USA     | 1985-2006 | 48505    | 93.8 [74.0; 115.8]                                 | 22.0 [14.6; 32.6]                                             | 12.1 [7.4; 17.6]                                               | 24.8 [18.1; 32.4]                                            | 10.5 [1.6; 19.3]                                           | 71.9 [63.1; 80.2]                        |
| St Louis       | USA     | 1985-2006 | 312923   | 79.8 [55.9; 106.2]                                 | 25.5 [15.2; 39.4]                                             | 12.7 [8.9; 18.2]                                               | 34.8 [26.9; 44.0]                                            | 15.6 [6.1; 23.6]                                           | 66.5 [56.1; 76.5]                        |
| Stamford       | USA     | 1985-2006 | 142216   | 86.3 [66.5; 109.6]                                 | 21.5 [15.6; 30.9]                                             | 10.4 [6.5; 16.7]                                               | 37.2 [26.2; 50.4]                                            | 11.3 [3.5; 19.2]                                           | 66.9 [56.1; 78.6]                        |
| St. Petersburg | USA     | 1985-2006 | 158555   | 73.7 [57.4; 94.1]                                  | 21.7 [17.1; 27.0]                                             | 9.3 [6.9; 12.6]                                                | 19.9 [12.1; 29.9]                                            | 24.7 [20.3; 27.9]                                          | 72.8 [65.6; 79.6]                        |
| State College  | USA     | 1996-2006 | 8609     | 92.9 [72.2; 113.4]                                 | NA                                                            | 10.9 [6.8; 16.5]                                               | 14.0 [9.6; 21.0]                                             | 11.2 [2.6; 19.1]                                           | 64.8 [54.7; 75.0]                        |
| Seattle        | USA     | 1985-2006 | 225451   | 59.0 [42.8; 77.2]                                  | 22.7 [15.9; 32.9]                                             | 7.9 [5.4; 11.6]                                                | 32.3 [23.2; 42.2]                                            | 10.7 [7.7; 14.2]                                           | 82.3 [76.9; 86.8]                        |
| Tacoma         | USA     | 1985-2006 | 96086    | 63.5 [50.5; 78.1]                                  | 24.3 [15.4; 38.2]                                             | 8.4 [5.3; 13.7]                                                | NA                                                           | 11.3 [7.3; 16.2]                                           | 74.4 [63.6; 84.2]                        |
| Tampa          | USA     | 1985-2006 | 158555   | 75.8 [59.3; 97.1]                                  | 24.6 [19.0; 30.5]                                             | 10.6 [7.9; 14.3]                                               | 15.9 [10.6; 23.3]                                            | 23.7 [19.4; 26.9]                                          | 74.4 [67.7; 80.2]                        |
| Tucson         | USA     | 1985-2006 | 131053   | 85.3 [67.8; 102.7]                                 | 25.3 [18.4; 34.7]                                             | 6.0 [4.7; 7.6]                                                 | 33.9 [25.0; 44.6]                                            | 21.3 [14; 27.9]                                            | 31.6 [20.7; 46.5]                        |
| Tallahassee    | USA     | 1985-2006 | 25858    | 74.4 [57.2; 97.1]                                  | 15.6 [12.1; 20.2]                                             | 11.6 [8.2; 16.4]                                               | NA                                                           | 20.9 [14.7; 25.6]                                          | 72.5 [62.6; 81.0]                        |
| Toledo         | USA     | 1985-2006 | 92004    | 81.7 [59.3; 104.9]                                 | 20.3 [14.6; 29.4]                                             | 12.8 [8.6; 18.7]                                               | NA                                                           | 10.8 [1.7; 19.6]                                           | 71.8 [63.2; 80.2]                        |
| Trenton        | USA     | 1985-2006 | 58430    | 72.0 [49.0; 105.0]                                 | 24.0 [16.0; 33.0]                                             | 10.1 [6.4; 15.9]                                               | 27.6 [19.5; 37.9]                                            | 12.7 [4.6; 20.9]                                           | 62.3 [52.3; 73.0]                        |
| Terra Haute    | USA     | 1985-2006 | 23821    | 94.3 [74.0; 115.6]                                 | 24.9 [17.7; 36.1]                                             | 12.1 [8.3; 17.5]                                               | NA                                                           | 13.1 [3.8; 21.2]                                           | 72.9 [64.3; 80.9]                        |
| Tulsa          | USA     | 1985-2006 | 95475    | 84.4 [62.2; 109.2]                                 | 23.6 [16.6; 32.2]                                             | 9.7 [6.7; 13.6]                                                | 21.2 [14.2; 29.5]                                            | 17 [8.3; 24.5]                                             | 64.3 [54.2; 74.8]                        |
| Visalia        | USA     | 1985-2006 | 50358    | 101.2 [67.0; 144.6]                                | 46.8 [32.1; 63.9]                                             | 16.0 [10.3; 24.0]                                              | 35.3 [27.1; 45.2]                                            | 17.4 [11.1; 24]                                            | 58.0 [47.7; 77.2]                        |
| Vancouver      | USA     | 1985-2006 | 37914    | 63.7 [49.0; 79.0]                                  | 15.5 [11.0; 22.1]                                             | 6.9 [4.7; 11.4]                                                | 23.4 [17.2; 30.3]                                            | 11.8 [7.3; 17.2]                                           | 72.8 [61.8; 82.4]                        |
| Ventura        | USA     | 1985-2006 | 87603    | 95.3 [74.2; 117.6]                                 | 28.7 [18.8; 37.0]                                             | 11.4 [6.9; 15.4]                                               | 23.0 [17.5; 29.8]                                            | 16.4 [14; 18.7]                                            | 75.5 [66.5; 81.8]                        |
| Wichita        | USA     | 1985-2006 | 68542    | 69.2 [50.0; 93.1]                                  | 21.9 [15.2; 30.4]                                             | 9.8 [6.7; 13.5]                                                | 17.6 [12.4; 24.6]                                            | 14.5 [5.4; 23.1]                                           | 65.3 [55.2; 75.4]                        |
| Weber          | USA     | 1985-2006 | 24455    | 108.0 [94.2; 122.5]                                | 25.0 [16.0; 35.0]                                             | 7.8 [5.4; 11.6]                                                | 45.0 [32.7; 58.5]                                            | 11.6 [3.2; 21.7]                                           | 47.9 [32.3; 66.4]                        |

| City       | Country | Period    | N deaths | Ozone ( $\mu\text{g}/\text{m}^3$ )<br>Median [IQR] | PM <sub>10</sub> ( $\mu\text{g}/\text{m}^3$ )<br>Median [IQR] | PM <sub>2.5</sub> ( $\mu\text{g}/\text{m}^3$ )<br>Median [IQR] | NO <sub>2</sub> ( $\mu\text{g}/\text{m}^3$ )<br>Median [IQR] | Mean<br>temperature ( $^{\circ}\text{C}$ )<br>Median [IQR] | Relative<br>humidity (%)<br>Median [IQR] |
|------------|---------|-----------|----------|----------------------------------------------------|---------------------------------------------------------------|----------------------------------------------------------------|--------------------------------------------------------------|------------------------------------------------------------|------------------------------------------|
| Wilmington | USA     | 1985-2006 | 76254    | 67.7 [44.1; 98.7]                                  | 22.6 [16.0; 31.9]                                             | 13.0 [8.8; 19.2]                                               | 37.6 [24.3; 52.0]                                            | 13.1 [5.1; 21.3]                                           | 67.5 [57.3; 78.2]                        |
| Winston    | USA     | 1985-2006 | 52543    | 101.0 [79.1; 123.0]                                | 22.0 [15.7; 29.7]                                             | 13.4 [9.0; 18.8]                                               | 26.8 [19.4; 36.3]                                            | 16.4 [8.7; 23]                                             | 63.0 [50.4; 75.5]                        |
| Worcester  | USA     | 1985-2006 | 135785   | 79.4 [61.5; 101.9]                                 | 19.1 [13.6; 28.1]                                             | 9.4 [6.2; 14.5]                                                | 38.3 [26.9; 51.6]                                            | 9.1 [0.8; 17.3]                                            | 67.2 [56.1; 79.4]                        |
| WDC        | USA     | 1985-2006 | 141028   | 56.8 [34.7; 91.5]                                  | 25.1 [17.6; 34.9]                                             | 13.3 [8.9; 18.9]                                               | 44.4 [34.4; 56.0]                                            | 14.7 [6.7; 22.8]                                           | 65.1 [54.0; 76.1]                        |
| Washington | USA     | 1985-2006 | 49002    | 82.6 [54.8; 110.6]                                 | 18.0 [12.0; 27.0]                                             | 12.6 [9.0; 18.2]                                               | 28.8 [20.6; 38.1]                                            | 11.8 [3.2; 19.2]                                           | 66.5 [56.2; 75.6]                        |
| Youngstown | USA     | 1985-2006 | 86656    | 86.8 [61.2; 114.5]                                 | 23.0 [16.0; 33.2]                                             | 13.6 [9.5; 19.5]                                               | 31.6 [23.1; 43.1]                                            | 10.6 [1.7; 18.4]                                           | 72.7 [64.1; 81.2]                        |
| York       | USA     | 1985-2006 | 62767    | 79.9 [51.9; 111.7]                                 | 22.2 [15.4; 31.8]                                             | 14.7 [9.6; 21.9]                                               | 37.7 [27.5; 48.2]                                            | 12.2 [3.9; 20.5]                                           | 67.2 [56.5; 77.7]                        |

Ozone: daily maximum 8-hour mean,  $\mu\text{g}/\text{m}^3$ . Mean temperature,  $^{\circ}\text{C}$ . PM<sub>10</sub>: inhalable particulate matter with an aerodynamic diameter of 10  $\mu\text{m}$  or less,  $\mu\text{g}/\text{m}^3$ . PM<sub>2.5</sub>: inhalable particulate matter with an aerodynamic diameter of 2.5  $\mu\text{m}$  or less,  $\mu\text{g}/\text{m}^3$ . NO<sub>2</sub>: nitrogen dioxide,  $\mu\text{g}/\text{m}^3$ . IQR: interquartile range. Relative humidity, in %.

**eTable 3.** Overall and country-specific excess mortality fractions (%; 95% confidence interval) associated to ozone for the total (above 70  $\mu\text{g}/\text{m}^3$ ) and above specific thresholds consistent with current air quality standards (AQS).

|                | <b>Total*</b><br><b>(Above 70 <math>\mu\text{g}/\text{m}^3</math>)</b> | <b>Above WHO AQS</b><br><b>(100 <math>\mu\text{g}/\text{m}^3</math>)</b> | <b>Above EU AQS</b><br><b>(120 <math>\mu\text{g}/\text{m}^3</math>)</b> | <b>Above NAAQS in the US</b><br><b>(140 <math>\mu\text{g}/\text{m}^3</math>)</b> | <b>Above CAAQS in China</b><br><b>(160 <math>\mu\text{g}/\text{m}^3</math>)</b> |
|----------------|------------------------------------------------------------------------|--------------------------------------------------------------------------|-------------------------------------------------------------------------|----------------------------------------------------------------------------------|---------------------------------------------------------------------------------|
| Australia**    | 0.00 [0.00; 0.00]                                                      | 0.00 [0.00; 0.00]                                                        | 0.00 [0.00; 0.00]                                                       | 0.00 [0.00; 0.00]                                                                | 0.00 [0.00; 0.00]                                                               |
| Canada         | 0.34 [0.29; 0.41]                                                      | 0.24 [0.18; 0.30]                                                        | 0.16 [0.10; 0.23]                                                       | 0.11 [0.04; 0.18]                                                                | 0.07 [-0.01; 0.14]                                                              |
| China          | 0.22 [0.04; 0.39]                                                      | 0.19 [0.00; 0.36]                                                        | 0.14 [-0.05; 0.32]                                                      | 0.10 [-0.11; 0.29]                                                               | 0.06 [-0.15; 0.26]                                                              |
| Czech Republic | 0.27 [0.02; 0.48]                                                      | 0.20 [-0.06; 0.44]                                                       | 0.12 [-0.16; 0.39]                                                      | 0.06 [-0.24; 0.34]                                                               | 0.03 [-0.30; 0.34]                                                              |
| Estonia        | 0.02 [0.01; 0.03]                                                      | 0.00 [-0.01; 0.01]                                                       | 0.00 [-0.01; 0.01]                                                      | 0.00 [-0.01; 0.01]                                                               | 0.00 [-0.01; 0.01]                                                              |
| France         | 0.20 [0.15; 0.25]                                                      | 0.14 [0.09; 0.19]                                                        | 0.08 [0.02; 0.13]                                                       | 0.04 [-0.02; 0.10]                                                               | 0.02 [-0.05; 0.08]                                                              |
| Germany        | 0.12 [0.09; 0.15]                                                      | 0.08 [0.05; 0.11]                                                        | 0.05 [0.01; 0.08]                                                       | 0.02 [-0.02; 0.06]                                                               | 0.01 [-0.03; 0.05]                                                              |
| Greece         | 0.16 [-0.07; 0.41]                                                     | 0.11 [-0.13; 0.37]                                                       | 0.04 [-0.27; 0.33]                                                      | 0.01 [-0.31; 0.34]                                                               | 0.00 [-0.33; 0.35]                                                              |
| Italy          | 0.27 [0.13; 0.42]                                                      | 0.19 [0.04; 0.35]                                                        | 0.09 [-0.08; 0.27]                                                      | 0.03 [-0.15; 0.23]                                                               | 0.01 [-0.20; 0.21]                                                              |
| Japan          | 0.31 [0.27; 0.35]                                                      | 0.21 [0.17; 0.26]                                                        | 0.12 [0.08; 0.16]                                                       | 0.05 [0.00; 0.10]                                                                | 0.02 [-0.03; 0.07]                                                              |
| Mexico         | 0.55 [0.16; 0.94]                                                      | 0.52 [0.14; 0.92]                                                        | 0.48 [0.09; 0.87]                                                       | 0.42 [0.03; 0.81]                                                                | 0.35 [-0.07; 0.75]                                                              |
| Portugal       | 0.08 [0.00; 0.16]                                                      | 0.04 [-0.05; 0.13]                                                       | 0.02 [-0.09; 0.11]                                                      | 0.01 [-0.10; 0.11]                                                               | 0.00 [-0.11; 0.12]                                                              |
| South Africa   | 0.28 [0.20; 0.35]                                                      | 0.18 [0.11; 0.26]                                                        | 0.10 [0.01; 0.19]                                                       | 0.04 [-0.05; 0.15]                                                               | 0.02 [-0.09; 0.13]                                                              |
| South Korea    | 0.12 [0.08; 0.16]                                                      | 0.08 [0.04; 0.12]                                                        | 0.04 [-0.01; 0.09]                                                      | 0.02 [-0.03; 0.07]                                                               | 0.01 [-0.04; 0.06]                                                              |
| Spain          | 0.04 [0.02; 0.06]                                                      | 0.02 [-0.01; 0.04]                                                       | 0.00 [-0.03; 0.03]                                                      | 0.00 [-0.03; 0.03]                                                               | 0.00 [-0.03; 0.03]                                                              |
| Sweden         | 0.10 [0.02; 0.18]                                                      | 0.03 [-0.07; 0.13]                                                       | 0.01 [-0.11; 0.12]                                                      | 0.00 [-0.12; 0.12]                                                               | 0.00 [-0.11; 0.11]                                                              |
| Switzerland    | 0.31 [0.21; 0.41]                                                      | 0.23 [0.12; 0.34]                                                        | 0.15 [0.03; 0.27]                                                       | 0.08 [-0.05; 0.21]                                                               | 0.04 [-0.11; 0.18]                                                              |
| Taiwan         | 0.41 [0.13; 0.68]                                                      | 0.37 [0.08; 0.64]                                                        | 0.29 [0.00; 0.58]                                                       | 0.21 [-0.09; 0.51]                                                               | 0.14 [-0.20; 0.47]                                                              |
| UK             | 0.09 [0.08; 0.10]                                                      | 0.05 [0.03; 0.06]                                                        | 0.03 [0.01; 0.04]                                                       | 0.01 [0.00; 0.03]                                                                | 0.01 [-0.01; 0.02]                                                              |
| USA            | 0.29 [0.28; 0.31]                                                      | 0.23 [0.22; 0.25]                                                        | 0.16 [0.14; 0.17]                                                       | 0.09 [0.08; 0.11]                                                                | 0.05 [0.03; 0.07]                                                               |
| <b>Overall</b> | <b>0.26 [0.24; 0.28]</b>                                               | <b>0.20 [0.18; 0.22]</b>                                                 | <b>0.14 [0.12; 0.16]</b>                                                | <b>0.09 [0.07; 0.11]</b>                                                         | <b>0.05 [0.03; 0.07]</b>                                                        |

\*Total refers to ozone-related deaths when levels above 70  $\mu\text{g}/\text{m}^3$  (defined as maximum background levels).

\*\*No mortality fractions associated to ozone were found in Australia, as daily ozone levels were below the maximum background level set up at 70  $\mu\text{g}/\text{m}^3$ .

AQS: air quality standards; WHO: World Health Organization; EU: European Union; NAAQS: National Ambient Air Quality Standard; CAAQS: Chinese Ambient Air Quality Standard

**eTable 4.** Overall and country-specific excess mortality fractions (and 95% confidence interval) associated to ozone between specific thresholds consistent with current air quality standards.

|                | Between 70 to 100<br>$\mu\text{g}/\text{m}^3$ | Between 100 to 120<br>$\mu\text{g}/\text{m}^3$ | Between 120 to 140<br>$\mu\text{g}/\text{m}^3$ | Between 140 to 160<br>$\mu\text{g}/\text{m}^3$ | Above 160 $\mu\text{g}/\text{m}^3$ |
|----------------|-----------------------------------------------|------------------------------------------------|------------------------------------------------|------------------------------------------------|------------------------------------|
| Australia*     | 0 [0;0]                                       | 0 [0;0]                                        | 0 [0;0]                                        | 0 [0;0]                                        | 0 [0;0]                            |
| Canada         | 0.11 [0.09;0.12]                              | 0.08 [0.05;0.11]                               | 0.05 [0.01;0.1]                                | 0.04 [-0.02;0.1]                               | 0.07 [-0.01;0.14]                  |
| China          | 0.04 [0.01;0.06]                              | 0.04 [-0.02;0.11]                              | 0.04 [-0.07;0.15]                              | 0.04 [-0.11;0.17]                              | 0.06 [-0.15;0.26]                  |
| Czech Republic | 0.06 [0.01;0.12]                              | 0.08 [-0.07;0.21]                              | 0.06 [-0.14;0.28]                              | 0.03 [-0.24;0.32]                              | 0.03 [-0.30;0.34]                  |
| Estonia        | 0.02 [0.01;0.03]                              | 0.00 [-0.01;0.01]                              | 0.00 [-0.01;0.01]                              | 0.00 [-0.01;0.01]                              | 0.00 [-0.01;0.01]                  |
| France         | 0.06 [0.05;0.08]                              | 0.06 [0.03;0.09]                               | 0.04 [-0.01;0.08]                              | 0.02 [-0.03;0.08]                              | 0.02 [-0.05;0.08]                  |
| Germany        | 0.04 [0.03;0.05]                              | 0.04 [0.01;0.06]                               | 0.02 [-0.01;0.06]                              | 0.01 [-0.02;0.05]                              | 0.01 [-0.03;0.05]                  |
| Greece         | 0.05 [-0.03;0.13]                             | 0.07 [-0.12;0.28]                              | 0.03 [-0.27;0.30]                              | 0.01 [-0.31;0.34]                              | 0.00 [-0.33;0.35]                  |
| Italy          | 0.08 [0.04;0.12]                              | 0.10 [-0.01;0.21]                              | 0.06 [-0.10;0.23]                              | 0.02 [-0.17;0.20]                              | 0.01 [-0.20;0.21]                  |
| Japan          | 0.10 [0.09;0.11]                              | 0.09 [0.07;0.12]                               | 0.07 [0.03;0.11]                               | 0.03 [-0.02;0.08]                              | 0.02 [-0.03;0.07]                  |
| Mexico         | 0.02 [0.01;0.03]                              | 0.04 [0.01;0.07]                               | 0.06 [-0.01;0.13]                              | 0.07 [-0.06;0.21]                              | 0.35 [-0.07;0.75]                  |
| Portugal       | 0.04 [0.00;0.09]                              | 0.02 [-0.06;0.10]                              | 0.01 [-0.09;0.11]                              | 0.00 [-0.10;0.12]                              | 0.00 [-0.11;0.12]                  |
| South Africa   | 0.09 [0.07;0.12]                              | 0.08 [0.03;0.13]                               | 0.06 [-0.03;0.14]                              | 0.03 [-0.07;0.12]                              | 0.02 [-0.09;0.13]                  |
| South Korea    | 0.04 [0.03;0.06]                              | 0.04 [0.01;0.07]                               | 0.02 [-0.02;0.07]                              | 0.01 [-0.04;0.06]                              | 0.01 [-0.04;0.06]                  |
| Spain          | 0.02 [0.01;0.04]                              | 0.01 [-0.01;0.03]                              | 0.00 [-0.03;0.03]                              | 0.00 [-0.03;0.03]                              | 0.00 [-0.03;0.03]                  |
| Sweden         | 0.07 [0.01;0.13]                              | 0.03 [-0.07;0.13]                              | 0.01 [-0.11;0.12]                              | 0.00 [-0.11;0.12]                              | 0.00 [-0.11;0.11]                  |
| Switzerland    | 0.08 [0.05;0.10]                              | 0.08 [0.02;0.14]                               | 0.07 [-0.03;0.16]                              | 0.04 [-0.08;0.16]                              | 0.04 [-0.11;0.18]                  |
| Taiwan         | 0.05 [0.01;0.08]                              | 0.07 [-0.03;0.16]                              | 0.08 [-0.09;0.25]                              | 0.08 [-0.16;0.31]                              | 0.14 [-0.20;0.47]                  |
| UK             | 0.04 [0.04;0.05]                              | 0.02 [0.01;0.03]                               | 0.02 [0.00;0.03]                               | 0.01 [-0.01;0.03]                              | 0.01 [-0.01;0.02]                  |
| USA            | 0.06 [0.06;0.06]                              | 0.07 [0.07;0.08]                               | 0.06 [0.05;0.08]                               | 0.04 [0.03;0.06]                               | 0.05 [0.03;0.07]                   |
| Overall        | 0.06 [0.06;0.06]                              | 0.06 [0.06;0.07]                               | 0.05 [0.04;0.06]                               | 0.04 [0.02;0.05]                               | 0.05 [0.03;0.07]                   |

\*No mortality fractions associated to ozone were found in Australia, as daily ozone levels were below 70  $\mu\text{g}/\text{m}^3$

**eTable 5.** Excess mortality associated to ozone for the total (above 70  $\mu\text{g}/\text{m}^3$ ) and above WHO guideline of 100  $\mu\text{g}/\text{m}^3$  in the 406 cities.

| City               | Country   | Total (Above 70 $\mu\text{g}/\text{m}^3$ )* |                                        | Above WHO Guideline (100 $\mu\text{g}/\text{m}^3$ ) |                                        |
|--------------------|-----------|---------------------------------------------|----------------------------------------|-----------------------------------------------------|----------------------------------------|
|                    |           | Excess fraction<br>(%, 95% CI)              | Annual excess<br>deaths<br>(N, 95% CI) | Excess fraction<br>(%, 95% CI)                      | Annual excess<br>deaths<br>(N, 95% CI) |
| Brisbane           | Australia | 0 [0; 0]                                    | 0 [0; 0]                               | 0 [0; 0]                                            | 0 [0; 0]                               |
| Melbourne          | Australia | 0 [0; 0]                                    | 0 [0; 0]                               | 0 [0; 0]                                            | 0 [0; 0]                               |
| Sydney             | Australia | 0 [0; 0]                                    | 0 [0; 0]                               | 0 [0; 0]                                            | 0 [0; 0]                               |
| Abbotsford         | Canada    | 0.18 [0.11; 0.25]                           | 2 [1; 3]                               | 0.09 [0.01; 0.17]                                   | 1 [0; 2]                               |
| Calgary            | Canada    | 0.3 [0.18; 0.42]                            | 16 [9; 22]                             | 0.14 [0.01; 0.28]                                   | 8 [1; 15]                              |
| Edmonton           | Canada    | 0.28 [0.18; 0.4]                            | 17 [11; 25]                            | 0.16 [0.05; 0.29]                                   | 10 [3; 18]                             |
| Halifax            | Canada    | 0.12 [0.07; 0.16]                           | 3 [2; 5]                               | 0.05 [-0.01; 0.1]                                   | 1 [0; 3]                               |
| Hamilton           | Canada    | 0.4 [0.25; 0.56]                            | 18 [11; 26]                            | 0.31 [0.15; 0.48]                                   | 14 [7; 22]                             |
| Kingston           | Canada    | 0.33 [0.19; 0.46]                           | 5 [3; 7]                               | 0.24 [0.1; 0.37]                                    | 4 [2; 6]                               |
| Kitchener-Waterloo | Canada    | 0.37 [0.22; 0.52]                           | 11 [6; 15]                             | 0.27 [0.11; 0.43]                                   | 8 [3; 12]                              |
| London Ontario     | Canada    | 0.36 [0.21; 0.5]                            | 14 [8; 20]                             | 0.28 [0.12; 0.42]                                   | 11 [4; 16]                             |
| Montreal           | Canada    | 0.41 [0.24; 0.58]                           | 45 [27; 65]                            | 0.28 [0.11; 0.46]                                   | 31 [12; 51]                            |
| Niagara            | Canada    | 0.48 [0.29; 0.66]                           | 19 [11; 26]                            | 0.39 [0.2; 0.58]                                    | 16 [8; 23]                             |
| Oakville           | Canada    | 0.37 [0.22; 0.53]                           | 9 [5; 13]                              | 0.28 [0.12; 0.44]                                   | 6 [3; 10]                              |
| Oshawa             | Canada    | 0.3 [0.18; 0.43]                            | 9 [5; 12]                              | 0.2 [0.07; 0.33]                                    | 6 [2; 10]                              |
| Ottawa             | Canada    | 0.22 [0.13; 0.32]                           | 12 [7; 18]                             | 0.13 [0.03; 0.24]                                   | 7 [2; 13]                              |
| Regina             | Canada    | 0.08 [0.05; 0.11]                           | 2 [1; 2]                               | 0.03 [-0.01; 0.07]                                  | 1 [0; 1]                               |
| Sarnia             | Canada    | 0.45 [0.26; 0.64]                           | 5 [3; 7]                               | 0.35 [0.15; 0.53]                                   | 4 [2; 6]                               |
| Sudbury            | Canada    | 0.28 [0.16; 0.39]                           | 5 [3; 6]                               | 0.17 [0.04; 0.28]                                   | 3 [1; 5]                               |
| Saint John NB      | Canada    | 0.24 [0.14; 0.34]                           | 4 [2; 6]                               | 0.1 [-0.01; 0.21]                                   | 2 [0; 4]                               |
| St. John's NFL     | Canada    | 0.08 [0.05; 0.11]                           | 2 [1; 2]                               | 0.02 [-0.02; 0.06]                                  | 0 [0; 1]                               |
| Sault Ste. Marie   | Canada    | 0.24 [0.14; 0.33]                           | 3 [2; 4]                               | 0.13 [0.02; 0.23]                                   | 2 [0; 3]                               |
| Saskatoon          | Canada    | 0.08 [0.05; 0.12]                           | 2 [1; 3]                               | 0.02 [-0.02; 0.06]                                  | 0 [0; 1]                               |
| Thunder Bay        | Canada    | 0.14 [0.08; 0.2]                            | 2 [1; 3]                               | 0.05 [-0.02; 0.12]                                  | 1 [0; 2]                               |



| City              | Country        | Total (Above 70 µg/m <sup>3</sup> )* |                                        | Above WHO Guideline (100 µg/m <sup>3</sup> ) |                                        |
|-------------------|----------------|--------------------------------------|----------------------------------------|----------------------------------------------|----------------------------------------|
|                   |                | Excess fraction<br>(%, 95% CI)       | Annual excess<br>deaths<br>(N, 95% CI) | Excess fraction<br>(%, 95% CI)               | Annual excess<br>deaths<br>(N, 95% CI) |
| Toronto           | Canada         | 0.59 [0.34; 0.85]                    | 159 [90; 228]                          | 0.48 [0.22; 0.73]                            | 128 [59; 197]                          |
| Victoria          | Canada         | 0.13 [0.08; 0.18]                    | 4 [3; 6]                               | 0.03 [-0.03; 0.1]                            | 1 [-1; 3]                              |
| Vancouver         | Canada         | 0.21 [0.13; 0.3]                     | 28 [17; 40]                            | 0.1 [0.01; 0.2]                              | 13 [1; 26]                             |
| Windsor           | Canada         | 0.42 [0.25; 0.59]                    | 11 [6; 15]                             | 0.35 [0.17; 0.52]                            | 9 [4; 14]                              |
| Winnipeg          | Canada         | 0.16 [0.09; 0.23]                    | 11 [6; 15]                             | 0.07 [-0.01; 0.15]                           | 5 [0; 10]                              |
| Hong Kong         | China          | 0.02 [0; 0.03]                       | 6 [1; 11]                              | 0.01 [-0.01; 0.02]                           | 2 [-3; 8]                              |
| Shanghai          | China          | 0.32 [0.04; 0.57]                    | 117 [15; 209]                          | 0.27 [-0.01; 0.53]                           | 99 [-4; 195]                           |
| Suzhou            | China          | 0.15 [0.02; 0.26]                    | 25 [4; 44]                             | 0.12 [-0.01; 0.23]                           | 19 [-2; 39]                            |
| Prague            | Czech Republic | 0.27 [0.02; 0.48]                    | 38 [3; 69]                             | 0.2 [-0.06; 0.44]                            | 29 [-9; 63]                            |
| Kohtla-Järve linn | Estonia        | 0.06 [0.02; 0.1]                     | 1 [0; 1]                               | 0.01 [-0.04; 0.06]                           | 0 [0; 1]                               |
| Narva linn        | Estonia        | 0.03 [0.01; 0.05]                    | 0 [0; 1]                               | 0 [-0.03; 0.03]                              | 0 [0; 0]                               |
| Tallinn           | Estonia        | 0.01 [0; 0.02]                       | 1 [0; 1]                               | 0 [-0.01; 0.01]                              | 0 [-1; 1]                              |
| Tartu linn        | Estonia        | 0.02 [0; 0.04]                       | 0 [0; 0]                               | 0 [-0.02; 0.02]                              | 0 [0; 0]                               |
| Bordeaux          | France         | 0.2 [0.07; 0.32]                     | 10 [4; 17]                             | 0.12 [-0.01; 0.25]                           | 6 [-1; 14]                             |
| Clermont-Ferrand  | France         | 0.24 [0.09; 0.42]                    | 5 [2; 8]                               | 0.15 [-0.02; 0.34]                           | 3 [0; 6]                               |
| Dijon             | France         | 0.21 [0.07; 0.35]                    | 4 [1; 7]                               | 0.14 [0; 0.29]                               | 3 [0; 5]                               |
| Grenoble          | France         | 0.26 [0.09; 0.42]                    | 8 [3; 14]                              | 0.19 [0.01; 0.35]                            | 6 [0; 12]                              |
| Le Havre          | France         | 0.14 [0.05; 0.22]                    | 3 [1; 5]                               | 0.06 [-0.04; 0.16]                           | 1 [-1; 4]                              |
| Lille             | France         | 0.12 [0.05; 0.2]                     | 11 [4; 18]                             | 0.08 [-0.01; 0.16]                           | 7 [-1; 14]                             |
| Lens-Douai        | France         | 0.12 [0.04; 0.2]                     | 4 [1; 7]                               | 0.07 [-0.02; 0.15]                           | 3 [-1; 6]                              |
| Lyon              | France         | 0.24 [0.09; 0.4]                     | 19 [7; 31]                             | 0.17 [0.01; 0.34]                            | 13 [1; 26]                             |
| Montpellier       | France         | 0.33 [0.12; 0.55]                    | 9 [3; 15]                              | 0.23 [0; 0.46]                               | 6 [0; 12]                              |
| Marseille         | France         | 0.32 [0.09; 0.54]                    | 31 [9; 52]                             | 0.23 [0; 0.47]                               | 22 [0; 45]                             |
| Nice              | France         | 0.43 [0.15; 0.7]                     | 23 [8; 37]                             | 0.35 [0.07; 0.64]                            | 18 [4; 33]                             |
| Nancy             | France         | 0.18 [0.06; 0.29]                    | 5 [2; 8]                               | 0.12 [0; 0.24]                               | 3 [0; 7]                               |
| Nantes            | France         | 0.19 [0.06; 0.31]                    | 8 [2; 14]                              | 0.11 [-0.04; 0.24]                           | 5 [-2; 11]                             |

| City        | Country | Total (Above 70 µg/m <sup>3</sup> )* |                                        | Above WHO Guideline (100 µg/m <sup>3</sup> ) |                                        |
|-------------|---------|--------------------------------------|----------------------------------------|----------------------------------------------|----------------------------------------|
|             |         | Excess fraction<br>(%, 95% CI)       | Annual excess<br>deaths<br>(N, 95% CI) | Excess fraction<br>(%, 95% CI)               | Annual excess<br>deaths<br>(N, 95% CI) |
| Paris       | France  | 0.15 [0.05; 0.26]                    | 70 [24; 119]                           | 0.11 [0; 0.21]                               | 48 [0; 96]                             |
| Rennes      | France  | 0.14 [0.05; 0.23]                    | 2 [1; 4]                               | 0.07 [-0.02; 0.17]                           | 1 [0; 3]                               |
| Rouen       | France  | 0.14 [0.04; 0.24]                    | 6 [2; 10]                              | 0.08 [-0.03; 0.18]                           | 3 [-1; 8]                              |
| Strasbourg  | France  | 0.22 [0.08; 0.37]                    | 8 [3; 13]                              | 0.17 [0.02; 0.32]                            | 6 [1; 11]                              |
| Toulouse    | France  | 0.25 [0.08; 0.42]                    | 12 [4; 21]                             | 0.16 [-0.02; 0.33]                           | 8 [-1; 16]                             |
| Berlin      | Germany | 0.12 [0.04; 0.2]                     | 46 [14; 74]                            | 0.08 [-0.01; 0.17]                           | 30 [-3; 62]                            |
| Bremen      | Germany | 0.1 [0.03; 0.16]                     | 7 [2; 11]                              | 0.06 [-0.01; 0.13]                           | 4 [-1; 9]                              |
| Dresden     | Germany | 0.15 [0.06; 0.25]                    | 9 [3; 14]                              | 0.1 [0; 0.2]                                 | 6 [0; 12]                              |
| Dortmund    | Germany | 0.11 [0.04; 0.19]                    | 8 [3; 13]                              | 0.08 [0; 0.16]                               | 6 [0; 11]                              |
| Duesseldorf | Germany | 0.11 [0.03; 0.19]                    | 8 [2; 14]                              | 0.08 [0; 0.16]                               | 6 [0; 12]                              |
| Frankfurt   | Germany | 0.12 [0.04; 0.2]                     | 9 [3; 16]                              | 0.08 [0.01; 0.17]                            | 6 [0; 13]                              |
| Hamburg     | Germany | 0.08 [0.03; 0.13]                    | 16 [5; 26]                             | 0.04 [-0.02; 0.1]                            | 8 [-3; 20]                             |
| Hannover    | Germany | 0.13 [0.04; 0.22]                    | 17 [5; 28]                             | 0.09 [-0.01; 0.18]                           | 11 [-1; 23]                            |
| Koeln       | Germany | 0.13 [0.05; 0.21]                    | 13 [5; 22]                             | 0.09 [0.01; 0.19]                            | 10 [1; 19]                             |
| Leipzig     | Germany | 0.16 [0.05; 0.27]                    | 11 [4; 19]                             | 0.11 [0; 0.22]                               | 8 [0; 15]                              |
| Muenchen    | Germany | 0.14 [0.04; 0.23]                    | 18 [5; 30]                             | 0.09 [-0.01; 0.19]                           | 12 [-2; 25]                            |
| Stuttgart   | Germany | 0.17 [0.06; 0.28]                    | 10 [4; 17]                             | 0.12 [0.01; 0.24]                            | 8 [1; 15]                              |
| Athens      | Greece  | 0.16 [-0.07; 0.41]                   | 52 [-23; 132]                          | 0.11 [-0.13; 0.37]                           | 35 [-42; 117]                          |
| Cagliari    | Italy   | 0.04 [0.01; 0.08]                    | 1 [0; 1]                               | 0 [-0.05; 0.06]                              | 0 [-1; 1]                              |
| Florence    | Italy   | 0.32 [0.03; 0.58]                    | 16 [2; 28]                             | 0.25 [-0.03; 0.52]                           | 12 [-1; 25]                            |
| Frosinone   | Italy   | 0.4 [0.07; 0.72]                     | 2 [0; 3]                               | 0.32 [-0.02; 0.66]                           | 1 [0; 3]                               |
| Genoa       | Italy   | 0.29 [0.04; 0.52]                    | 27 [4; 49]                             | 0.21 [-0.04; 0.46]                           | 20 [-4; 44]                            |
| Latina      | Italy   | 0.25 [0.04; 0.47]                    | 2 [0; 5]                               | 0.14 [-0.09; 0.38]                           | 1 [-1; 4]                              |
| Milan       | Italy   | 0.24 [0.03; 0.46]                    | 33 [4; 61]                             | 0.19 [-0.02; 0.41]                           | 26 [-2; 55]                            |
| Rieti       | Italy   | 0.28 [0.04; 0.51]                    | 1 [0; 2]                               | 0.2 [-0.06; 0.45]                            | 1 [0; 2]                               |
| Rome        | Italy   | 0.27 [0.05; 0.52]                    | 69 [13; 132]                           | 0.19 [-0.05; 0.44]                           | 48 [-12; 111]                          |

| City      | Country | Total (Above 70 $\mu\text{g}/\text{m}^3$ )* |                                        | Above WHO Guideline (100 $\mu\text{g}/\text{m}^3$ ) |                                        |
|-----------|---------|---------------------------------------------|----------------------------------------|-----------------------------------------------------|----------------------------------------|
|           |         | Excess fraction<br>(%, 95% CI)              | Annual excess<br>deaths<br>(N, 95% CI) | Excess fraction<br>(%, 95% CI)                      | Annual excess<br>deaths<br>(N, 95% CI) |
| Trieste   | Italy   | 0.32 [0.03; 0.58]                           | 10 [1; 19]                             | 0.21 [-0.09; 0.49]                                  | 7 [-3; 16]                             |
| Aikita    | Japan   | 0.35 [0.18; 0.53]                           | 15 [8; 23]                             | 0.21 [0.02; 0.4]                                    | 9 [1; 17]                              |
| Aomori    | Japan   | 0.23 [0.12; 0.35]                           | 10 [5; 15]                             | 0.12 [-0.01; 0.25]                                  | 5 [0; 11]                              |
| Chiba     | Japan   | 0.3 [0.15; 0.46]                            | 29 [14; 44]                            | 0.21 [0.05; 0.37]                                   | 20 [5; 35]                             |
| Fukushima | Japan   | 0.26 [0.13; 0.39]                           | 10 [5; 15]                             | 0.16 [0.01; 0.31]                                   | 6 [0; 12]                              |
| Fukuoka   | Japan   | 0.37 [0.18; 0.56]                           | 50 [25; 75]                            | 0.26 [0.06; 0.45]                                   | 35 [8; 60]                             |
| Fukui     | Japan   | 0.42 [0.2; 0.64]                            | 14 [7; 21]                             | 0.3 [0.08; 0.52]                                    | 10 [3; 18]                             |
| Gifu      | Japan   | 0.38 [0.19; 0.58]                           | 20 [10; 30]                            | 0.28 [0.09; 0.48]                                   | 14 [5; 25]                             |
| Hiroshima | Japan   | 0.37 [0.19; 0.55]                           | 44 [23; 66]                            | 0.26 [0.08; 0.45]                                   | 32 [10; 54]                            |
| Kagoshima | Japan   | 0.2 [0.1; 0.3]                              | 15 [7; 22]                             | 0.1 [-0.02; 0.21]                                   | 7 [-1; 15]                             |
| Kumamoto  | Japan   | 0.39 [0.21; 0.59]                           | 32 [17; 48]                            | 0.28 [0.1; 0.49]                                    | 23 [8; 40]                             |
| Kanazawa  | Japan   | 0.44 [0.23; 0.65]                           | 23 [12; 34]                            | 0.3 [0.07; 0.5]                                     | 16 [4; 27]                             |
| Kobe      | Japan   | 0.33 [0.16; 0.5]                            | 61 [30; 91]                            | 0.23 [0.07; 0.4]                                    | 43 [12; 74]                            |
| Kochi     | Japan   | 0.34 [0.17; 0.5]                            | 15 [8; 22]                             | 0.21 [0.03; 0.39]                                   | 9 [2; 17]                              |
| Kofu      | Japan   | 0.37 [0.18; 0.56]                           | 10 [5; 15]                             | 0.27 [0.07; 0.46]                                   | 7 [2; 12]                              |
| Kyoto     | Japan   | 0.36 [0.18; 0.54]                           | 62 [30; 93]                            | 0.25 [0.07; 0.44]                                   | 44 [12; 75]                            |
| Matsue    | Japan   | 0.52 [0.27; 0.78]                           | 14 [7; 22]                             | 0.37 [0.11; 0.64]                                   | 10 [3; 18]                             |
| Maebashi  | Japan   | 0.47 [0.24; 0.7]                            | 21 [11; 30]                            | 0.37 [0.13; 0.62]                                   | 16 [6; 27]                             |
| Mito      | Japan   | 0.36 [0.17; 0.55]                           | 11 [6; 17]                             | 0.25 [0.05; 0.44]                                   | 8 [2; 14]                              |
| Morioka   | Japan   | 0.21 [0.11; 0.32]                           | 7 [4; 11]                              | 0.12 [0; 0.23]                                      | 4 [0; 8]                               |
| Matsuyama | Japan   | 0.27 [0.14; 0.41]                           | 17 [9; 26]                             | 0.17 [0.03; 0.31]                                   | 11 [2; 19]                             |
| Nagano    | Japan   | 0.3 [0.15; 0.44]                            | 15 [7; 22]                             | 0.19 [0.05; 0.34]                                   | 9 [2; 17]                              |
| Nagoya    | Japan   | 0.36 [0.19; 0.54]                           | 90 [47; 136]                           | 0.26 [0.07; 0.44]                                   | 65 [18; 111]                           |
| Naha      | Japan   | 0.17 [0.09; 0.26]                           | 5 [3; 8]                               | 0.08 [-0.01; 0.17]                                  | 2 [0; 5]                               |
| Nara      | Japan   | 0.35 [0.18; 0.52]                           | 15 [7; 22]                             | 0.24 [0.07; 0.42]                                   | 10 [3; 18]                             |
| Nagasaki  | Japan   | 0.28 [0.14; 0.41]                           | 17 [8; 25]                             | 0.17 [0.02; 0.31]                                   | 10 [1; 19]                             |

| City       | Country     | Total (Above 70 $\mu\text{g}/\text{m}^3$ )* |                                        | Above WHO Guideline (100 $\mu\text{g}/\text{m}^3$ ) |                                        |
|------------|-------------|---------------------------------------------|----------------------------------------|-----------------------------------------------------|----------------------------------------|
|            |             | Excess fraction<br>(%, 95% CI)              | Annual excess<br>deaths<br>(N, 95% CI) | Excess fraction<br>(%, 95% CI)                      | Annual excess<br>deaths<br>(N, 95% CI) |
| Niigata    | Japan       | 0.36 [0.19; 0.52]                           | 36 [19; 53]                            | 0.21 [0.04; 0.4]                                    | 22 [4; 40]                             |
| Oita       | Japan       | 0.22 [0.12; 0.33]                           | 11 [6; 16]                             | 0.12 [0; 0.24]                                      | 6 [0; 12]                              |
| Okayama    | Japan       | 0.31 [0.16; 0.45]                           | 25 [12; 36]                            | 0.21 [0.06; 0.37]                                   | 17 [5; 29]                             |
| Osaka      | Japan       | 0.31 [0.16; 0.47]                           | 104 [53; 158]                          | 0.22 [0.06; 0.39]                                   | 74 [20; 131]                           |
| Otsu       | Japan       | 0.38 [0.18; 0.58]                           | 13 [6; 20]                             | 0.27 [0.06; 0.47]                                   | 9 [2; 16]                              |
| Saga       | Japan       | 0.39 [0.2; 0.58]                            | 12 [6; 18]                             | 0.28 [0.09; 0.47]                                   | 9 [3; 15]                              |
| Saitama    | Japan       | 0.37 [0.19; 0.55]                           | 44 [23; 65]                            | 0.28 [0.1; 0.47]                                    | 33 [11; 55]                            |
| Sendai     | Japan       | 0.26 [0.13; 0.39]                           | 27 [13; 40]                            | 0.16 [0.01; 0.3]                                    | 16 [1; 30]                             |
| Shizuoka   | Japan       | 0.38 [0.18; 0.56]                           | 35 [16; 52]                            | 0.28 [0.07; 0.47]                                   | 26 [6; 44]                             |
| Sapporo    | Japan       | 0.14 [0.08; 0.21]                           | 30 [16; 44]                            | 0.06 [-0.02; 0.14]                                  | 13 [-4; 30]                            |
| Takamatsu  | Japan       | 0.3 [0.14; 0.46]                            | 16 [8; 24]                             | 0.19 [0.02; 0.35]                                   | 10 [1; 18]                             |
| Tokushima  | Japan       | 0.37 [0.19; 0.54]                           | 13 [6; 19]                             | 0.27 [0.08; 0.45]                                   | 9 [3; 16]                              |
| Tokyo      | Japan       | 0.27 [0.14; 0.4]                            | 249 [127; 371]                         | 0.18 [0.04; 0.32]                                   | 170 [40; 304]                          |
| Toyama     | Japan       | 0.4 [0.2; 0.59]                             | 22 [11; 33]                            | 0.27 [0.06; 0.47]                                   | 15 [3; 26]                             |
| Tsu        | Japan       | 0.42 [0.21; 0.62]                           | 16 [8; 23]                             | 0.31 [0.08; 0.51]                                   | 12 [3; 19]                             |
| Utsunomiya | Japan       | 0.38 [0.21; 0.57]                           | 21 [11; 31]                            | 0.29 [0.1; 0.48]                                    | 16 [6; 26]                             |
| Wakayama   | Japan       | 0.37 [0.2; 0.55]                            | 20 [11; 30]                            | 0.27 [0.09; 0.46]                                   | 14 [5; 25]                             |
| Yokohama   | Japan       | 0.3 [0.16; 0.44]                            | 111 [60; 162]                          | 0.23 [0.09; 0.38]                                   | 86 [31; 140]                           |
| Yamaguchi  | Japan       | 0.33 [0.16; 0.48]                           | 9 [4; 13]                              | 0.22 [0.05; 0.39]                                   | 6 [1; 10]                              |
| Yamagata   | Japan       | 0.3 [0.16; 0.45]                            | 10 [5; 15]                             | 0.19 [0.04; 0.35]                                   | 6 [1; 12]                              |
| Busan      | South Korea | 0.12 [0.02; 0.21]                           | 25 [5; 42]                             | 0.07 [-0.04; 0.17]                                  | 13 [-9; 33]                            |
| Daegu      | South Korea | 0.18 [0.05; 0.3]                            | 22 [7; 38]                             | 0.13 [0.01; 0.26]                                   | 16 [1; 32]                             |
| Daejeon    | South Korea | 0.15 [0.03; 0.26]                           | 10 [2; 17]                             | 0.11 [0; 0.22]                                      | 7 [0; 14]                              |
| Gwangju    | South Korea | 0.14 [0.04; 0.25]                           | 9 [3; 16]                              | 0.1 [-0.01; 0.2]                                    | 6 [-1; 13]                             |
| Incheon    | South Korea | 0.12 [0.04; 0.2]                            | 14 [4; 24]                             | 0.07 [-0.02; 0.16]                                  | 9 [-2; 20]                             |
| Seoul      | South Korea | 0.1 [0.03; 0.17]                            | 41 [13; 71]                            | 0.06 [-0.01; 0.14]                                  | 27 [-3; 58]                            |

| City                 | Country      | Total (Above 70 µg/m <sup>3</sup> )* |                                        | Above WHO Guideline (100 µg/m <sup>3</sup> ) |                                        |
|----------------------|--------------|--------------------------------------|----------------------------------------|----------------------------------------------|----------------------------------------|
|                      |              | Excess fraction<br>(%, 95% CI)       | Annual excess<br>deaths<br>(N, 95% CI) | Excess fraction<br>(%, 95% CI)               | Annual excess<br>deaths<br>(N, 95% CI) |
| Ulsan                | South Korea  | 0.14 [0.05; 0.24]                    | 6 [2; 11]                              | 0.09 [-0.02; 0.2]                            | 4 [-1; 9]                              |
| Guadalajara          | Mexico       | 0.42 [0.04; 0.8]                     | 93 [10; 179]                           | 0.38 [0.01; 0.78]                            | 85 [2; 173]                            |
| Leon                 | Mexico       | 0.32 [0.01; 0.62]                    | 25 [1; 48]                             | 0.28 [-0.04; 0.58]                           | 22 [-3; 45]                            |
| Monterrey            | Mexico       | 0.25 [0.01; 0.48]                    | 45 [3; 87]                             | 0.2 [-0.03; 0.44]                            | 37 [-6; 80]                            |
| Puebla-Tlaxcala      | Mexico       | 0.23 [0.01; 0.45]                    | 30 [2; 59]                             | 0.19 [-0.03; 0.42]                           | 25 [-4; 55]                            |
| Tijuana              | Mexico       | 0.09 [0; 0.17]                       | 6 [0; 11]                              | 0.04 [-0.06; 0.14]                           | 2 [-4; 9]                              |
| Toluca de Lerdo      | Mexico       | 0.33 [0.01; 0.69]                    | 27 [1; 57]                             | 0.3 [-0.03; 0.66]                            | 24 [-2; 54]                            |
| Valley of Mexico     | Mexico       | 0.73 [0.04; 1.38]                    | 707 [39; 1339]                         | 0.72 [0.02; 1.36]                            | 694 [22; 1317]                         |
| Lisboa               | Portugal     | 0.09 [-0.03; 0.2]                    | 20 [-6; 45]                            | 0.04 [-0.09; 0.17]                           | 9 [-20; 39]                            |
| Porto                | Portugal     | 0.07 [-0.02; 0.15]                   | 10 [-3; 23]                            | 0.03 [-0.06; 0.12]                           | 5 [-10; 19]                            |
| City of Johannesburg | South Africa | 0.32 [0.15; 0.49]                    | 121 [59; 187]                          | 0.22 [0.05; 0.39]                            | 82 [19; 148]                           |
| eThekweni            | South Africa | 0.14 [0.06; 0.22]                    | 56 [25; 85]                            | 0.08 [0; 0.17]                               | 33 [0; 66]                             |
| Gert Sibande         | South Africa | 0.54 [0.27; 0.83]                    | 79 [39; 121]                           | 0.37 [0.08; 0.68]                            | 54 [11; 99]                            |
| Nkangala             | South Africa | 0.43 [0.22; 0.68]                    | 65 [32; 101]                           | 0.33 [0.1; 0.58]                             | 50 [15; 87]                            |
| Sedibeng             | South Africa | 0.33 [0.15; 0.5]                     | 43 [20; 64]                            | 0.19 [-0.01; 0.37]                           | 24 [-2; 48]                            |
| A Coruna             | Spain        | 0.03 [-0.04; 0.1]                    | 1 [-1; 3]                              | 0.01 [-0.07; 0.1]                            | 0 [-2; 2]                              |
| Albacete             | Spain        | 0.1 [-0.13; 0.35]                    | 1 [-2; 4]                              | 0.07 [-0.19; 0.33]                           | 1 [-2; 4]                              |
| Alicante             | Spain        | 0.06 [-0.08; 0.18]                   | 2 [-2; 5]                              | 0.01 [-0.17; 0.18]                           | 0 [-5; 5]                              |
| Almeria              | Spain        | 0.07 [-0.08; 0.23]                   | 1 [-1; 3]                              | 0.03 [-0.15; 0.23]                           | 0 [-2; 3]                              |
| Avila                | Spain        | 0.04 [-0.06; 0.13]                   | 0 [0; 1]                               | 0.01 [-0.11; 0.11]                           | 0 [-1; 1]                              |
| Badajoz              | Spain        | 0.02 [-0.02; 0.06]                   | 0 [0; 1]                               | 0 [-0.05; 0.05]                              | 0 [-1; 1]                              |
| Bilbao               | Spain        | 0.01 [-0.02; 0.04]                   | 0 [-1; 2]                              | 0 [-0.04; 0.04]                              | 0 [-1; 2]                              |
| Barcelona            | Spain        | 0.02 [-0.03; 0.08]                   | 4 [-5; 13]                             | 0 [-0.07; 0.07]                              | 1 [-11; 13]                            |
| Burgos               | Spain        | 0.07 [-0.09; 0.25]                   | 1 [-2; 4]                              | 0.04 [-0.15; 0.23]                           | 1 [-2; 4]                              |
| Cadiz                | Spain        | 0.08 [-0.11; 0.27]                   | 1 [-1; 4]                              | 0.04 [-0.17; 0.25]                           | 0 [-2; 3]                              |
| Caceres              | Spain        | 0.02 [-0.02; 0.05]                   | 0 [0; 0]                               | 0 [-0.04; 0.05]                              | 0 [0; 0]                               |

| City              | Country | Total (Above 70 $\mu\text{g}/\text{m}^3$ )* |                                        | Above WHO Guideline (100 $\mu\text{g}/\text{m}^3$ ) |                                        |
|-------------------|---------|---------------------------------------------|----------------------------------------|-----------------------------------------------------|----------------------------------------|
|                   |         | Excess fraction<br>(%, 95% CI)              | Annual excess<br>deaths<br>(N, 95% CI) | Excess fraction<br>(%, 95% CI)                      | Annual excess<br>deaths<br>(N, 95% CI) |
| Ciudad Real       | Spain   | 0.1 [-0.15; 0.32]                           | 1 [-1; 2]                              | 0.06 [-0.19; 0.3]                                   | 0 [-1; 2]                              |
| Ceuta             | Spain   | 0.09 [-0.11; 0.29]                          | 0 [-1; 2]                              | 0.05 [-0.17; 0.27]                                  | 0 [-1; 1]                              |
| Cordoba           | Spain   | 0.06 [-0.08; 0.2]                           | 2 [-2; 5]                              | 0.02 [-0.15; 0.19]                                  | 0 [-4; 5]                              |
| Castellon         | Spain   | 0.01 [-0.01; 0.04]                          | 0 [0; 0]                               | 0 [-0.04; 0.04]                                     | 0 [0; 1]                               |
| Cuenca            | Spain   | 0.09 [-0.12; 0.29]                          | 1 [-1; 2]                              | 0.06 [-0.16; 0.27]                                  | 0 [-1; 2]                              |
| Guadalajara       | Spain   | 0.11 [-0.15; 0.39]                          | 1 [-1; 2]                              | 0.09 [-0.18; 0.37]                                  | 1 [-1; 2]                              |
| Granada           | Spain   | 0.05 [-0.07; 0.15]                          | 1 [-2; 3]                              | 0.01 [-0.12; 0.13]                                  | 0 [-3; 3]                              |
| Huesca            | Spain   | 0.09 [-0.1; 0.32]                           | 1 [-1; 2]                              | 0.06 [-0.14; 0.31]                                  | 0 [-1; 2]                              |
| Jaen              | Spain   | 0.12 [-0.14; 0.41]                          | 1 [-1; 4]                              | 0.09 [-0.19; 0.39]                                  | 1 [-2; 4]                              |
| Leon              | Spain   | 0.03 [-0.04; 0.1]                           | 0 [-1; 1]                              | 0.01 [-0.08; 0.09]                                  | 0 [-1; 1]                              |
| Lleida            | Spain   | 0.07 [-0.09; 0.21]                          | 1 [-1; 3]                              | 0.04 [-0.12; 0.19]                                  | 0 [-1; 2]                              |
| Lugo              | Spain   | 0.02 [-0.03; 0.08]                          | 0 [0; 1]                               | 0.01 [-0.06; 0.07]                                  | 0 [-1; 1]                              |
| Malaga            | Spain   | 0.06 [-0.09; 0.21]                          | 3 [-4; 10]                             | 0.02 [-0.17; 0.21]                                  | 1 [-8; 10]                             |
| Madrid            | Spain   | 0.03 [-0.04; 0.11]                          | 9 [-12; 31]                            | 0.01 [-0.07; 0.1]                                   | 3 [-21; 27]                            |
| Melilla           | Spain   | 0.1 [-0.12; 0.34]                           | 0 [-1; 2]                              | 0.08 [-0.15; 0.33]                                  | 0 [-1; 2]                              |
| Murcia            | Spain   | 0.08 [-0.1; 0.27]                           | 3 [-3; 9]                              | 0.05 [-0.15; 0.26]                                  | 2 [-5; 9]                              |
| Ourense           | Spain   | 0.05 [-0.07; 0.16]                          | 1 [-1; 2]                              | 0.03 [-0.11; 0.15]                                  | 0 [-1; 2]                              |
| Oviedo            | Spain   | 0.02 [-0.03; 0.08]                          | 1 [-1; 2]                              | 0.01 [-0.06; 0.07]                                  | 0 [-1; 2]                              |
| Palmas G. Canaria | Spain   | 0 [0; 0.01]                                 | 0 [0; 0]                               | 0 [-0.01; 0.01]                                     | 0 [0; 0]                               |
| Palma Mallorca    | Spain   | 0.04 [-0.05; 0.13]                          | 1 [-1; 4]                              | 0.01 [-0.1; 0.12]                                   | 0 [-3; 4]                              |
| Palencia          | Spain   | 0.03 [-0.04; 0.09]                          | 0 [0; 1]                               | 0 [-0.08; 0.09]                                     | 0 [-1; 1]                              |
| Pamplona          | Spain   | 0.04 [-0.04; 0.11]                          | 1 [-1; 2]                              | 0.01 [-0.08; 0.11]                                  | 0 [-1; 2]                              |
| Segovia           | Spain   | 0.04 [-0.06; 0.13]                          | 0 [0; 1]                               | 0.01 [-0.12; 0.13]                                  | 0 [-1; 1]                              |
| Salamanca         | Spain   | 0.02 [-0.03; 0.08]                          | 0 [0; 1]                               | 0 [-0.06; 0.08]                                     | 0 [-1; 1]                              |
| San Sebastian     | Spain   | 0.02 [-0.02; 0.05]                          | 0 [0; 1]                               | 0 [-0.05; 0.05]                                     | 0 [-1; 1]                              |
| Santander         | Spain   | 0.01 [-0.01; 0.04]                          | 0 [0; 1]                               | 0 [-0.03; 0.03]                                     | 0 [-1; 1]                              |

| City           | Country     | Total (Above 70 µg/m <sup>3</sup> )* |                                        | Above WHO Guideline (100 µg/m <sup>3</sup> ) |                                        |
|----------------|-------------|--------------------------------------|----------------------------------------|----------------------------------------------|----------------------------------------|
|                |             | Excess fraction<br>(%, 95% CI)       | Annual excess<br>deaths<br>(N, 95% CI) | Excess fraction<br>(%, 95% CI)               | Annual excess<br>deaths<br>(N, 95% CI) |
| Soria          | Spain       | 0.04 [-0.05; 0.15]                   | 0 [0; 1]                               | 0.02 [-0.1; 0.14]                            | 0 [0; 1]                               |
| Sevilla        | Spain       | 0.08 [-0.11; 0.27]                   | 5 [-7; 17]                             | 0.05 [-0.14; 0.25]                           | 3 [-9; 16]                             |
| Teruel         | Spain       | 0.09 [-0.12; 0.28]                   | 0 [0; 1]                               | 0.05 [-0.19; 0.27]                           | 0 [-1; 1]                              |
| Tenerife       | Spain       | 0.05 [-0.07; 0.16]                   | 1 [-1; 3]                              | 0.01 [-0.14; 0.15]                           | 0 [-3; 3]                              |
| Toledo         | Spain       | 0.09 [-0.12; 0.29]                   | 0 [-1; 2]                              | 0.04 [-0.19; 0.26]                           | 0 [-1; 1]                              |
| Tarragona      | Spain       | 0.08 [-0.11; 0.24]                   | 1 [-1; 2]                              | 0.04 [-0.17; 0.23]                           | 0 [-2; 2]                              |
| Vitoria        | Spain       | 0.04 [-0.04; 0.14]                   | 1 [-1; 3]                              | 0.01 [-0.08; 0.13]                           | 0 [-2; 2]                              |
| Valladolid     | Spain       | 0.07 [-0.09; 0.23]                   | 2 [-3; 7]                              | 0.04 [-0.14; 0.23]                           | 1 [-4; 7]                              |
| Valencia       | Spain       | 0.02 [-0.02; 0.05]                   | 1 [-1; 4]                              | 0 [-0.04; 0.04]                              | 0 [-3; 3]                              |
| Zamora         | Spain       | 0.03 [-0.04; 0.09]                   | 0 [0; 1]                               | 0 [-0.09; 0.09]                              | 0 [-1; 1]                              |
| Zaragoza       | Spain       | 0.01 [-0.01; 0.03]                   | 1 [-1; 2]                              | 0 [-0.03; 0.03]                              | 0 [-2; 2]                              |
| Basel          | Switzerland | 0.28 [0.05; 0.5]                     | 6 [1; 10]                              | 0.21 [-0.04; 0.43]                           | 4 [-1; 9]                              |
| Bern           | Switzerland | 0.28 [0.06; 0.54]                    | 4 [1; 8]                               | 0.2 [-0.03; 0.46]                            | 3 [0; 7]                               |
| Geneva         | Switzerland | 0.2 [0.05; 0.36]                     | 3 [1; 5]                               | 0.13 [-0.03; 0.31]                           | 2 [0; 4]                               |
| Lausanne       | Switzerland | 0.29 [0.06; 0.52]                    | 3 [1; 6]                               | 0.21 [-0.04; 0.46]                           | 2 [0; 5]                               |
| Lugano         | Switzerland | 0.45 [0.1; 0.82]                     | 7 [2; 13]                              | 0.4 [0.04; 0.78]                             | 6 [1; 12]                              |
| Luzern         | Switzerland | 0.26 [0.04; 0.46]                    | 2 [0; 4]                               | 0.19 [-0.03; 0.4]                            | 2 [0; 3]                               |
| St. Gallen     | Switzerland | 0.39 [0.08; 0.7]                     | 3 [1; 5]                               | 0.27 [-0.07; 0.59]                           | 2 [-1; 4]                              |
| Zurich         | Switzerland | 0.31 [0.05; 0.54]                    | 13 [2; 22]                             | 0.23 [-0.02; 0.48]                           | 10 [-1; 20]                            |
| Stockholm      | Sweden      | 0.1 [0.02; 0.18]                     | 10 [2; 18]                             | 0.03 [-0.07; 0.13]                           | 3 [-7; 13]                             |
| Kaohsiung      | Taiwan      | 0.57 [-0.08; 1.19]                   | 115 [-16; 237]                         | 0.55 [-0.1; 1.16]                            | 109 [-20; 231]                         |
| Taipei         | Taiwan      | 0.34 [-0.05; 0.72]                   | 131 [-21; 276]                         | 0.28 [-0.11; 0.67]                           | 109 [-43; 258]                         |
| Taichung       | Taiwan      | 0.38 [-0.01; 0.8]                    | 59 [-2; 125]                           | 0.33 [-0.05; 0.75]                           | 52 [-8; 117]                           |
| Bristol        | UK          | 0.09 [0.06; 0.12]                    | 5 [4; 7]                               | 0.03 [0; 0.06]                               | 2 [0; 4]                               |
| Cardiff        | UK          | 0.12 [0.08; 0.15]                    | 4 [3; 5]                               | 0.07 [0.03; 0.1]                             | 2 [1; 4]                               |
| Greater London | UK          | 0.1 [0.07; 0.12]                     | 63 [44; 81]                            | 0.06 [0.02; 0.09]                            | 37 [15; 57]                            |

| City               | Country | Total (Above 70 µg/m <sup>3</sup> )* |                                     | Above WHO Guideline (100 µg/m <sup>3</sup> ) |                                     |
|--------------------|---------|--------------------------------------|-------------------------------------|----------------------------------------------|-------------------------------------|
|                    |         | Excess fraction<br>(%, 95% CI)       | Annual excess deaths<br>(N, 95% CI) | Excess fraction<br>(%, 95% CI)               | Annual excess deaths<br>(N, 95% CI) |
| Greater Manchester | UK      | 0.06 [0.04; 0.08]                    | 11 [7; 14]                          | 0.03 [0.01; 0.05]                            | 5 [2; 9]                            |
| Kingston upon Hull | UK      | 0.06 [0.04; 0.08]                    | 2 [2; 3]                            | 0.03 [0; 0.05]                               | 1 [0; 2]                            |
| Leicester          | UK      | 0.15 [0.1; 0.2]                      | 7 [5; 9]                            | 0.09 [0.04; 0.14]                            | 4 [2; 6]                            |
| Liverpool          | UK      | 0.07 [0.05; 0.09]                    | 6 [4; 8]                            | 0.02 [-0.01; 0.04]                           | 2 [0; 4]                            |
| Norwich            | UK      | 0.21 [0.15; 0.27]                    | 5 [3; 6]                            | 0.12 [0.05; 0.19]                            | 3 [1; 4]                            |
| Nottingham         | UK      | 0.06 [0.04; 0.08]                    | 3 [2; 4]                            | 0.03 [0.01; 0.05]                            | 2 [1; 3]                            |
| Sheffield          | UK      | 0.06 [0.04; 0.08]                    | 4 [3; 5]                            | 0.03 [0; 0.05]                               | 2 [0; 3]                            |
| Southampton        | UK      | 0.07 [0.05; 0.1]                     | 2 [1; 3]                            | 0.03 [0; 0.06]                               | 1 [0; 2]                            |
| The Potteries      | UK      | 0.13 [0.09; 0.17]                    | 6 [4; 8]                            | 0.06 [0.02; 0.11]                            | 3 [1; 5]                            |
| Tyneside           | UK      | 0.08 [0.06; 0.11]                    | 6 [4; 8]                            | 0.02 [-0.01; 0.05]                           | 2 [-1; 4]                           |
| West Midlands      | UK      | 0.11 [0.08; 0.14]                    | 28 [20; 37]                         | 0.06 [0.02; 0.1]                             | 15 [6; 25]                          |
| West Yorkshire     | UK      | 0.05 [0.03; 0.06]                    | 5 [4; 7]                            | 0.02 [0; 0.04]                               | 2 [0; 4]                            |
| Augusta            | USA     | 0.46 [0.27; 0.62]                    | 8 [5; 11]                           | 0.38 [0.18; 0.55]                            | 7 [3; 10]                           |
| Akron              | USA     | 0.43 [0.26; 0.59]                    | 22 [13; 30]                         | 0.36 [0.2; 0.53]                             | 19 [10; 27]                         |
| Albany             | USA     | 0.19 [0.11; 0.26]                    | 5 [3; 8]                            | 0.13 [0.05; 0.21]                            | 4 [1; 6]                            |
| Albuquerque        | USA     | 0.28 [0.17; 0.4]                     | 10 [6; 14]                          | 0.19 [0.06; 0.31]                            | 7 [2; 11]                           |
| Allentown          | USA     | 0.36 [0.22; 0.5]                     | 10 [6; 15]                          | 0.29 [0.15; 0.44]                            | 9 [4; 13]                           |
| Anaheim            | USA     | 0.28 [0.16; 0.4]                     | 42 [25; 60]                         | 0.2 [0.08; 0.32]                             | 30 [12; 48]                         |
| Ann Arbor          | USA     | 0.39 [0.25; 0.55]                    | 6 [4; 9]                            | 0.3 [0.15; 0.45]                             | 5 [2; 7]                            |
| Annandale          | USA     | 0.29 [0.18; 0.41]                    | 10 [6; 14]                          | 0.24 [0.13; 0.37]                            | 8 [4; 12]                           |
| Austin             | USA     | 0.3 [0.18; 0.42]                     | 10 [6; 14]                          | 0.22 [0.09; 0.35]                            | 7 [3; 11]                           |
| Atlantic City      | USA     | 0.33 [0.19; 0.46]                    | 8 [5; 11]                           | 0.26 [0.13; 0.39]                            | 6 [3; 9]                            |
| Atlanta            | USA     | 0.52 [0.32; 0.71]                    | 77 [47; 105]                        | 0.45 [0.24; 0.65]                            | 67 [35; 96]                         |
| Atzec              | USA     | 0.38 [0.22; 0.53]                    | 2 [1; 2]                            | 0.28 [0.13; 0.44]                            | 1 [1; 2]                            |
| Buffalo            | USA     | 0.24 [0.15; 0.34]                    | 24 [15; 34]                         | 0.19 [0.09; 0.28]                            | 19 [9; 28]                          |
| Bakersfield        | USA     | 0.63 [0.38; 0.89]                    | 27 [16; 38]                         | 0.58 [0.33; 0.84]                            | 25 [14; 36]                         |



| City             | Country | Total (Above 70 $\mu\text{g}/\text{m}^3$ )* |                                        | Above WHO Guideline (100 $\mu\text{g}/\text{m}^3$ ) |                                        |
|------------------|---------|---------------------------------------------|----------------------------------------|-----------------------------------------------------|----------------------------------------|
|                  |         | Excess fraction<br>(%, 95% CI)              | Annual excess<br>deaths<br>(N, 95% CI) | Excess fraction<br>(%, 95% CI)                      | Annual excess<br>deaths<br>(N, 95% CI) |
| Boulder          | USA     | 0.28 [0.17; 0.4]                            | 3 [2; 5]                               | 0.2 [0.08; 0.32]                                    | 2 [1; 4]                               |
| Baltimore        | USA     | 0.3 [0.18; 0.42]                            | 45 [28; 64]                            | 0.25 [0.13; 0.37]                                   | 38 [20; 57]                            |
| Bangor           | USA     | 0.22 [0.14; 0.32]                           | 3 [2; 4]                               | 0.13 [0.04; 0.23]                                   | 2 [0; 3]                               |
| Bergen           | USA     | 0.21 [0.12; 0.29]                           | 23 [14; 33]                            | 0.16 [0.08; 0.24]                                   | 19 [10; 28]                            |
| Burlington       | USA     | 0.25 [0.15; 0.35]                           | 2 [1; 3]                               | 0.16 [0.05; 0.27]                                   | 1 [0; 2]                               |
| Birmingham       | USA     | 0.35 [0.22; 0.49]                           | 29 [18; 40]                            | 0.28 [0.14; 0.42]                                   | 23 [11; 34]                            |
| Barnstable       | USA     | 0.41 [0.26; 0.58]                           | 10 [7; 14]                             | 0.32 [0.16; 0.5]                                    | 8 [4; 12]                              |
| Brownsville      | USA     | 0.13 [0.08; 0.18]                           | 2 [1; 3]                               | 0.07 [0.01; 0.13]                                   | 1 [0; 2]                               |
| Boston           | USA     | 0.16 [0.1; 0.23]                            | 37 [23; 52]                            | 0.12 [0.06; 0.19]                                   | 27 [13; 43]                            |
| Baton Rouge      | USA     | 0.27 [0.17; 0.38]                           | 8 [5; 11]                              | 0.21 [0.1; 0.32]                                    | 6 [3; 10]                              |
| Cedar Rapids     | USA     | 0.14 [0.09; 0.2]                            | 2 [1; 3]                               | 0.08 [0.02; 0.15]                                   | 1 [0; 2]                               |
| Chicago          | USA     | 0.14 [0.08; 0.19]                           | 73 [44; 101]                           | 0.1 [0.04; 0.15]                                    | 51 [21; 80]                            |
| Charlotte        | USA     | 0.55 [0.32; 0.77]                           | 22 [13; 30]                            | 0.48 [0.26; 0.7]                                    | 19 [10; 28]                            |
| Charleston SC    | USA     | 0.23 [0.13; 0.33]                           | 6 [3; 8]                               | 0.16 [0.05; 0.26]                                   | 4 [1; 6]                               |
| Chattanooga      | USA     | 0.42 [0.26; 0.59]                           | 12 [7; 17]                             | 0.35 [0.18; 0.52]                                   | 10 [5; 15]                             |
| Charleston WV    | USA     | 0.34 [0.2; 0.47]                            | 8 [5; 11]                              | 0.28 [0.15; 0.42]                                   | 7 [3; 10]                              |
| Columbus         | USA     | 0.41 [0.24; 0.57]                           | 31 [18; 43]                            | 0.33 [0.16; 0.49]                                   | 25 [12; 37]                            |
| Colorado Springs | USA     | 0.25 [0.15; 0.34]                           | 6 [4; 8]                               | 0.15 [0.05; 0.25]                                   | 4 [1; 6]                               |
| Cleveland        | USA     | 0.34 [0.2; 0.46]                            | 64 [38; 89]                            | 0.27 [0.13; 0.4]                                    | 52 [25; 76]                            |
| Cincinnati       | USA     | 0.41 [0.25; 0.57]                           | 34 [20; 47]                            | 0.34 [0.17; 0.51]                                   | 28 [14; 41]                            |
| Canton           | USA     | 0.47 [0.28; 0.66]                           | 17 [10; 24]                            | 0.39 [0.2; 0.59]                                    | 15 [8; 22]                             |
| Columbia         | USA     | 0.34 [0.2; 0.47]                            | 12 [7; 17]                             | 0.28 [0.13; 0.42]                                   | 10 [5; 15]                             |
| Corpus Christi   | USA     | 0.2 [0.12; 0.28]                            | 4 [3; 6]                               | 0.14 [0.05; 0.22]                                   | 3 [1; 5]                               |
| Davis            | USA     | 0.5 [0.31; 0.71]                            | 4 [3; 6]                               | 0.41 [0.21; 0.62]                                   | 4 [2; 5]                               |
| Dallas           | USA     | 0.29 [0.17; 0.4]                            | 36 [22; 50]                            | 0.23 [0.12; 0.35]                                   | 29 [14; 43]                            |
| Denver           | USA     | 0.28 [0.16; 0.38]                           | 24 [14; 33]                            | 0.2 [0.08; 0.31]                                    | 18 [7; 27]                             |

| City            | Country | Total (Above 70 µg/m <sup>3</sup> )* |                                        | Above WHO Guideline (100 µg/m <sup>3</sup> ) |                                        |
|-----------------|---------|--------------------------------------|----------------------------------------|----------------------------------------------|----------------------------------------|
|                 |         | Excess fraction<br>(%, 95% CI)       | Annual excess<br>deaths<br>(N, 95% CI) | Excess fraction<br>(%, 95% CI)               | Annual excess<br>deaths<br>(N, 95% CI) |
| Dodge           | USA     | 0.3 [0.18; 0.41]                     | 2 [1; 2]                               | 0.21 [0.09; 0.33]                            | 1 [0; 2]                               |
| Dover           | USA     | 0.49 [0.3; 0.69]                     | 5 [3; 7]                               | 0.41 [0.22; 0.63]                            | 4 [2; 6]                               |
| Durham          | USA     | 0.54 [0.34; 0.76]                    | 9 [6; 13]                              | 0.46 [0.26; 0.68]                            | 8 [4; 11]                              |
| Des Moines      | USA     | 0.08 [0.05; 0.12]                    | 2 [1; 3]                               | 0.04 [0; 0.08]                               | 1 [0; 2]                               |
| Detroit         | USA     | 0.28 [0.17; 0.39]                    | 97 [58; 136]                           | 0.22 [0.1; 0.33]                             | 76 [34; 116]                           |
| Davenport       | USA     | 0.29 [0.17; 0.4]                     | 8 [4; 11]                              | 0.21 [0.09; 0.33]                            | 6 [2; 9]                               |
| Daytona Beach   | USA     | 0.22 [0.12; 0.3]                     | 12 [7; 17]                             | 0.13 [0.04; 0.22]                            | 7 [2; 12]                              |
| Dayton          | USA     | 0.44 [0.27; 0.63]                    | 23 [14; 33]                            | 0.36 [0.2; 0.55]                             | 19 [10; 28]                            |
| El Centro       | USA     | 0.37 [0.23; 0.53]                    | 3 [2; 4]                               | 0.28 [0.12; 0.44]                            | 2 [1; 3]                               |
| Elkhart         | USA     | 0.44 [0.27; 0.61]                    | 6 [4; 8]                               | 0.33 [0.16; 0.51]                            | 5 [2; 7]                               |
| El Paso         | USA     | 0.25 [0.15; 0.35]                    | 9 [5; 12]                              | 0.16 [0.06; 0.26]                            | 6 [2; 9]                               |
| Elizabeth       | USA     | 0.25 [0.15; 0.35]                    | 13 [8; 17]                             | 0.21 [0.1; 0.31]                             | 10 [5; 15]                             |
| Erie            | USA     | 0.35 [0.21; 0.49]                    | 9 [5; 13]                              | 0.28 [0.13; 0.42]                            | 7 [3; 11]                              |
| Essex           | USA     | 0.21 [0.13; 0.29]                    | 13 [8; 18]                             | 0.14 [0.05; 0.23]                            | 9 [3; 14]                              |
| Eugene          | USA     | 0.2 [0.12; 0.27]                     | 5 [3; 7]                               | 0.12 [0.04; 0.21]                            | 3 [1; 5]                               |
| Evansville      | USA     | 0.56 [0.35; 0.77]                    | 10 [6; 14]                             | 0.48 [0.27; 0.69]                            | 9 [5; 12]                              |
| Fargo           | USA     | 0.14 [0.09; 0.21]                    | 1 [1; 2]                               | 0.06 [0; 0.13]                               | 0 [0; 1]                               |
| Flint           | USA     | 0.36 [0.21; 0.51]                    | 13 [8; 18]                             | 0.27 [0.12; 0.43]                            | 10 [4; 15]                             |
| Fresno          | USA     | 0.57 [0.35; 0.8]                     | 28 [18; 40]                            | 0.52 [0.3; 0.76]                             | 26 [15; 38]                            |
| Fort Lauderdale | USA     | 0.13 [0.08; 0.18]                    | 18 [12; 26]                            | 0.07 [0.01; 0.12]                            | 10 [2; 18]                             |
| Fort Myers      | USA     | 0.2 [0.12; 0.29]                     | 8 [5; 12]                              | 0.12 [0.03; 0.21]                            | 5 [1; 9]                               |
| Fort Pierce     | USA     | 0.19 [0.12; 0.27]                    | 7 [5; 10]                              | 0.11 [0.03; 0.19]                            | 4 [1; 7]                               |
| Fort Worth      | USA     | 0.35 [0.22; 0.49]                    | 29 [18; 40]                            | 0.29 [0.15; 0.43]                            | 24 [12; 36]                            |
| Fort Wayne      | USA     | 0.5 [0.28; 0.7]                      | 12 [7; 17]                             | 0.41 [0.19; 0.6]                             | 10 [5; 14]                             |
| Fayetteville    | USA     | 0.55 [0.34; 0.77]                    | 9 [6; 13]                              | 0.48 [0.27; 0.7]                             | 8 [4; 12]                              |
| Gary            | USA     | 0.44 [0.26; 0.61]                    | 19 [11; 26]                            | 0.36 [0.18; 0.53]                            | 15 [8; 23]                             |

| City          | Country | Total (Above 70 $\mu\text{g}/\text{m}^3$ )* |                                        | Above WHO Guideline (100 $\mu\text{g}/\text{m}^3$ ) |                                        |
|---------------|---------|---------------------------------------------|----------------------------------------|-----------------------------------------------------|----------------------------------------|
|               |         | Excess fraction<br>(%, 95% CI)              | Annual excess<br>deaths<br>(N, 95% CI) | Excess fraction<br>(%, 95% CI)                      | Annual excess<br>deaths<br>(N, 95% CI) |
| Greensburg    | USA     | 0.34 [0.19; 0.47]                           | 14 [8; 20]                             | 0.26 [0.12; 0.4]                                    | 11 [5; 16]                             |
| Grand Heaven  | USA     | 0.45 [0.26; 0.64]                           | 6 [3; 8]                               | 0.36 [0.17; 0.56]                                   | 5 [2; 7]                               |
| Grand Junctio | USA     | 0.31 [0.19; 0.43]                           | 3 [2; 4]                               | 0.18 [0.04; 0.31]                                   | 2 [0; 3]                               |
| Grand Rapids  | USA     | 0.39 [0.24; 0.55]                           | 15 [9; 20]                             | 0.31 [0.16; 0.47]                                   | 12 [6; 18]                             |
| Greensboro    | USA     | 0.6 [0.38; 0.83]                            | 19 [12; 26]                            | 0.53 [0.31; 0.76]                                   | 17 [10; 24]                            |
| Gasinesville  | USA     | 0.28 [0.17; 0.38]                           | 4 [2; 5]                               | 0.2 [0.08; 0.31]                                    | 3 [1; 4]                               |
| Gettysburg    | USA     | 0.43 [0.27; 0.6]                            | 4 [3; 6]                               | 0.34 [0.17; 0.51]                                   | 3 [2; 5]                               |
| Holland       | USA     | 0.5 [0.31; 0.7]                             | 2 [1; 3]                               | 0.41 [0.22; 0.61]                                   | 2 [1; 3]                               |
| Harrisburg    | USA     | 0.36 [0.22; 0.49]                           | 8 [5; 12]                              | 0.29 [0.16; 0.43]                                   | 7 [4; 10]                              |
| Hartford      | USA     | 0.3 [0.18; 0.42]                            | 23 [14; 32]                            | 0.23 [0.1; 0.35]                                    | 17 [8; 27]                             |
| Houston       | USA     | 0.27 [0.16; 0.37]                           | 47 [27; 65]                            | 0.22 [0.11; 0.33]                                   | 38 [19; 58]                            |
| Indianapolis  | USA     | 0.52 [0.32; 0.72]                           | 37 [23; 51]                            | 0.44 [0.23; 0.64]                                   | 31 [16; 46]                            |
| Iowa city     | USA     | 0.2 [0.12; 0.28]                            | 1 [1; 1]                               | 0.13 [0.05; 0.21]                                   | 1 [0; 1]                               |
| Jacksonville  | USA     | 0.26 [0.16; 0.36]                           | 15 [9; 21]                             | 0.18 [0.07; 0.28]                                   | 10 [4; 17]                             |
| Jersey city   | USA     | 0.25 [0.14; 0.34]                           | 12 [7; 17]                             | 0.2 [0.09; 0.31]                                    | 10 [5; 15]                             |
| Kalamazoo     | USA     | 0.36 [0.2; 0.5]                             | 6 [4; 9]                               | 0.27 [0.12; 0.42]                                   | 5 [2; 8]                               |
| Kenosha       | USA     | 0.46 [0.28; 0.63]                           | 5 [3; 7]                               | 0.37 [0.17; 0.53]                                   | 4 [2; 6]                               |
| Kansas        | USA     | 0.2 [0.12; 0.28]                            | 21 [13; 29]                            | 0.15 [0.07; 0.23]                                   | 16 [7; 24]                             |
| Knoxville     | USA     | 0.41 [0.25; 0.56]                           | 16 [9; 22]                             | 0.33 [0.16; 0.48]                                   | 13 [6; 18]                             |
| Lafayette LA  | USA     | 0.29 [0.18; 0.41]                           | 3 [2; 5]                               | 0.22 [0.1; 0.34]                                    | 3 [1; 4]                               |
| Lake Charles  | USA     | 0.25 [0.14; 0.34]                           | 4 [2; 5]                               | 0.18 [0.06; 0.27]                                   | 3 [1; 4]                               |
| Lakeland      | USA     | 0.23 [0.14; 0.33]                           | 12 [7; 17]                             | 0.15 [0.06; 0.25]                                   | 8 [3; 13]                              |
| Lancaster     | USA     | 0.41 [0.25; 0.58]                           | 16 [10; 22]                            | 0.35 [0.19; 0.52]                                   | 13 [7; 20]                             |
| Louisville    | USA     | 0.33 [0.19; 0.46]                           | 22 [13; 31]                            | 0.27 [0.13; 0.4]                                    | 18 [8; 27]                             |
| La Porte      | USA     | 0.5 [0.3; 0.7]                              | 5 [3; 7]                               | 0.41 [0.2; 0.62]                                    | 4 [2; 6]                               |
| Los Angeles   | USA     | 0.41 [0.24; 0.57]                           | 242 [142; 335]                         | 0.36 [0.19; 0.52]                                   | 211 [112; 307]                         |

| City        | Country | Total (Above 70 µg/m <sup>3</sup> )* |                                        | Above WHO Guideline (100 µg/m <sup>3</sup> ) |                                        |
|-------------|---------|--------------------------------------|----------------------------------------|----------------------------------------------|----------------------------------------|
|             |         | Excess fraction<br>(%, 95% CI)       | Annual excess<br>deaths<br>(N, 95% CI) | Excess fraction<br>(%, 95% CI)               | Annual excess<br>deaths<br>(N, 95% CI) |
| Las Vegas   | USA     | 0.34 [0.2; 0.47]                     | 29 [17; 41]                            | 0.26 [0.12; 0.39]                            | 22 [10; 34]                            |
| Little Rock | USA     | 0.28 [0.16; 0.39]                    | 8 [5; 12]                              | 0.2 [0.09; 0.32]                             | 6 [3; 10]                              |
| Macon       | USA     | 0.53 [0.32; 0.76]                    | 9 [6; 13]                              | 0.45 [0.23; 0.68]                            | 8 [4; 12]                              |
| Mc Allen    | USA     | 0.13 [0.08; 0.18]                    | 4 [2; 5]                               | 0.07 [0.01; 0.13]                            | 2 [0; 4]                               |
| Middlesex   | USA     | 0.31 [0.18; 0.44]                    | 16 [10; 23]                            | 0.26 [0.14; 0.4]                             | 14 [7; 21]                             |
| Middletown  | USA     | 0.44 [0.27; 0.62]                    | 10 [6; 15]                             | 0.36 [0.2; 0.55]                             | 9 [5; 13]                              |
| Medford     | USA     | 0.32 [0.2; 0.45]                     | 5 [3; 7]                               | 0.22 [0.09; 0.36]                            | 4 [2; 6]                               |
| Madison IL  | USA     | 0.25 [0.15; 0.34]                    | 6 [3; 8]                               | 0.19 [0.09; 0.29]                            | 4 [2; 7]                               |
| Modesto     | USA     | 0.36 [0.23; 0.49]                    | 11 [7; 15]                             | 0.29 [0.16; 0.44]                            | 9 [5; 13]                              |
| Madison WI  | USA     | 0.32 [0.19; 0.45]                    | 7 [4; 10]                              | 0.23 [0.09; 0.37]                            | 5 [2; 8]                               |
| Miami       | USA     | 0.14 [0.09; 0.2]                     | 25 [16; 36]                            | 0.08 [0.02; 0.14]                            | 14 [3; 26]                             |
| Melbourn    | USA     | 0.22 [0.13; 0.3]                     | 10 [6; 13]                             | 0.13 [0.04; 0.22]                            | 6 [2; 10]                              |
| Milwaukee   | USA     | 0.28 [0.17; 0.4]                     | 31 [19; 45]                            | 0.21 [0.09; 0.33]                            | 23 [10; 37]                            |
| Memphis     | USA     | 0.54 [0.34; 0.75]                    | 39 [24; 54]                            | 0.46 [0.25; 0.67]                            | 33 [18; 49]                            |
| Monmouth    | USA     | 0.46 [0.27; 0.65]                    | 52 [30; 73]                            | 0.39 [0.21; 0.58]                            | 43 [23; 65]                            |
| Montgomery  | USA     | 0.37 [0.22; 0.52]                    | 7 [4; 10]                              | 0.29 [0.14; 0.44]                            | 6 [3; 8]                               |
| Mobile      | USA     | 0.3 [0.18; 0.42]                     | 10 [6; 15]                             | 0.22 [0.09; 0.34]                            | 8 [3; 12]                              |
| Monroe      | USA     | 0.29 [0.18; 0.41]                    | 4 [2; 5]                               | 0.22 [0.1; 0.34]                             | 3 [1; 4]                               |
| Mercer      | USA     | 0.38 [0.23; 0.53]                    | 5 [3; 7]                               | 0.32 [0.17; 0.47]                            | 4 [2; 6]                               |
| Marlboro    | USA     | 0.46 [0.29; 0.64]                    | 18 [11; 25]                            | 0.4 [0.23; 0.59]                             | 16 [9; 23]                             |
| Muskegon    | USA     | 0.49 [0.3; 0.69]                     | 7 [4; 10]                              | 0.41 [0.21; 0.61]                            | 6 [3; 9]                               |
| Muncie      | USA     | 0.53 [0.31; 0.77]                    | 7 [4; 10]                              | 0.44 [0.22; 0.67]                            | 6 [3; 9]                               |
| Nashua      | USA     | 0.28 [0.17; 0.39]                    | 7 [4; 9]                               | 0.19 [0.08; 0.3]                             | 5 [2; 7]                               |
| Nassau      | USA     | 0.23 [0.14; 0.32]                    | 50 [30; 71]                            | 0.18 [0.08; 0.28]                            | 39 [18; 61]                            |
| Niles       | USA     | 0.56 [0.34; 0.79]                    | 8 [5; 12]                              | 0.46 [0.24; 0.69]                            | 7 [4; 10]                              |
| Nashville   | USA     | 0.21 [0.13; 0.29]                    | 10 [6; 14]                             | 0.15 [0.07; 0.24]                            | 7 [3; 11]                              |

| City         | Country | Total (Above 70 µg/m <sup>3</sup> )* |                                        | Above WHO Guideline (100 µg/m <sup>3</sup> ) |                                        |
|--------------|---------|--------------------------------------|----------------------------------------|----------------------------------------------|----------------------------------------|
|              |         | Excess fraction<br>(%, 95% CI)       | Annual excess<br>deaths<br>(N, 95% CI) | Excess fraction<br>(%, 95% CI)               | Annual excess<br>deaths<br>(N, 95% CI) |
| Newburgh     | USA     | 0.42 [0.26; 0.59]                    | 11 [6; 15]                             | 0.33 [0.16; 0.51]                            | 8 [4; 13]                              |
| Newhaven     | USA     | 0.35 [0.21; 0.49]                    | 27 [16; 37]                            | 0.27 [0.13; 0.41]                            | 20 [9; 31]                             |
| Newlond      | USA     | 0.49 [0.29; 0.68]                    | 9 [6; 13]                              | 0.39 [0.19; 0.59]                            | 7 [4; 11]                              |
| New Orleans  | USA     | 0.3 [0.18; 0.42]                     | 31 [19; 44]                            | 0.24 [0.12; 0.36]                            | 25 [13; 38]                            |
| Newark       | USA     | 0.26 [0.16; 0.36]                    | 27 [17; 38]                            | 0.21 [0.11; 0.31]                            | 22 [11; 33]                            |
| New York     | USA     | 0.16 [0.09; 0.22]                    | 103 [59; 141]                          | 0.12 [0.05; 0.19]                            | 81 [33; 121]                           |
| Ocala        | USA     | 0.25 [0.15; 0.35]                    | 9 [6; 13]                              | 0.17 [0.06; 0.27]                            | 6 [2; 10]                              |
| Oklahoma     | USA     | 0.31 [0.19; 0.44]                    | 17 [11; 25]                            | 0.24 [0.11; 0.37]                            | 13 [6; 21]                             |
| Oakland      | USA     | 0.08 [0.04; 0.1]                     | 12 [7; 16]                             | 0.03 [0; 0.06]                               | 5 [-1; 10]                             |
| Omaha        | USA     | 0.14 [0.09; 0.2]                     | 5 [3; 7]                               | 0.08 [0.02; 0.14]                            | 3 [1; 5]                               |
| Orlando      | USA     | 0.26 [0.16; 0.36]                    | 19 [12; 27]                            | 0.17 [0.07; 0.28]                            | 13 [5; 21]                             |
| Philadelphia | USA     | 0.28 [0.17; 0.39]                    | 122 [73; 170]                          | 0.24 [0.12; 0.35]                            | 102 [53; 151]                          |
| Phoenix      | USA     | 0.36 [0.23; 0.5]                     | 66 [42; 92]                            | 0.28 [0.14; 0.43]                            | 52 [26; 80]                            |
| Palm beach   | USA     | 0.12 [0.07; 0.16]                    | 13 [8; 18]                             | 0.06 [0.01; 0.11]                            | 7 [1; 12]                              |
| Plymouth     | USA     | 0.26 [0.16; 0.35]                    | 10 [6; 13]                             | 0.19 [0.09; 0.29]                            | 7 [3; 11]                              |
| Pensacola    | USA     | 0.32 [0.21; 0.45]                    | 8 [5; 11]                              | 0.24 [0.11; 0.36]                            | 6 [3; 9]                               |
| Portland OR  | USA     | 0.15 [0.09; 0.2]                     | 15 [9; 20]                             | 0.09 [0.03; 0.15]                            | 9 [3; 15]                              |
| Port Arthur  | USA     | 0.26 [0.16; 0.36]                    | 6 [4; 9]                               | 0.2 [0.1; 0.3]                               | 5 [2; 7]                               |
| Portage      | USA     | 0.41 [0.25; 0.57]                    | 4 [2; 5]                               | 0.32 [0.17; 0.49]                            | 3 [2; 5]                               |
| Portland ME  | USA     | 0.25 [0.16; 0.35]                    | 6 [3; 8]                               | 0.17 [0.07; 0.28]                            | 4 [2; 6]                               |
| Providence   | USA     | 0.37 [0.24; 0.51]                    | 45 [29; 62]                            | 0.28 [0.14; 0.42]                            | 34 [17; 51]                            |
| Pittsburg    | USA     | 0.25 [0.15; 0.35]                    | 38 [23; 53]                            | 0.2 [0.1; 0.3]                               | 31 [16; 46]                            |
| Richmond     | USA     | 0.46 [0.28; 0.64]                    | 25 [16; 36]                            | 0.39 [0.21; 0.58]                            | 22 [12; 32]                            |
| Rochester    | USA     | 0.18 [0.11; 0.25]                    | 11 [7; 15]                             | 0.13 [0.06; 0.21]                            | 8 [4; 12]                              |
| Rockville    | USA     | 0.46 [0.28; 0.64]                    | 20 [13; 28]                            | 0.4 [0.22; 0.59]                             | 17 [10; 26]                            |
| Reading      | USA     | 0.34 [0.2; 0.47]                     | 12 [7; 16]                             | 0.28 [0.14; 0.41]                            | 10 [5; 14]                             |

| City           | Country | Total (Above 70 µg/m <sup>3</sup> )* |                                     | Above WHO Guideline (100 µg/m <sup>3</sup> ) |                                     |
|----------------|---------|--------------------------------------|-------------------------------------|----------------------------------------------|-------------------------------------|
|                |         | Excess fraction<br>(%, 95% CI)       | Annual excess deaths<br>(N, 95% CI) | Excess fraction<br>(%, 95% CI)               | Annual excess deaths<br>(N, 95% CI) |
| Reno           | USA     | 0.24 [0.15; 0.35]                    | 5 [3; 7]                            | 0.15 [0.05; 0.27]                            | 3 [1; 6]                            |
| Raleigh        | USA     | 0.48 [0.29; 0.66]                    | 13 [8; 18]                          | 0.41 [0.22; 0.6]                             | 11 [6; 17]                          |
| Riverside      | USA     | 0.6 [0.35; 0.85]                     | 124 [73; 175]                       | 0.55 [0.31; 0.8]                             | 113 [64; 166]                       |
| Sacramento     | USA     | 0.32 [0.2; 0.45]                     | 27 [16; 37]                         | 0.25 [0.12; 0.38]                            | 21 [10; 31]                         |
| Scranton       | USA     | 0.3 [0.18; 0.43]                     | 22 [13; 31]                         | 0.23 [0.1; 0.36]                             | 17 [7; 26]                          |
| San Diego      | USA     | 0.34 [0.2; 0.47]                     | 59 [35; 82]                         | 0.23 [0.09; 0.37]                            | 41 [16; 66]                         |
| San Francisco  | USA     | 0.02 [0.01; 0.03]                    | 3 [2; 3]                            | 0.01 [0; 0.02]                               | 1 [-1; 2]                           |
| Salt Lake      | USA     | 0.44 [0.26; 0.62]                    | 19 [11; 26]                         | 0.35 [0.18; 0.53]                            | 15 [8; 23]                          |
| San Jose       | USA     | 0.11 [0.07; 0.15]                    | 9 [6; 13]                           | 0.06 [0.01; 0.11]                            | 5 [1; 9]                            |
| San Antonio    | USA     | 0.28 [0.18; 0.38]                    | 25 [16; 34]                         | 0.2 [0.08; 0.31]                             | 17 [7; 27]                          |
| Spokane        | USA     | 0.31 [0.18; 0.45]                    | 10 [6; 15]                          | 0.18 [0.04; 0.32]                            | 6 [1; 11]                           |
| Springfield MA | USA     | 0.24 [0.14; 0.33]                    | 11 [6; 15]                          | 0.17 [0.07; 0.27]                            | 8 [3; 12]                           |
| Springfield MO | USA     | 0.26 [0.16; 0.37]                    | 5 [3; 8]                            | 0.18 [0.08; 0.28]                            | 4 [2; 6]                            |
| Spartanburg    | USA     | 0.43 [0.24; 0.59]                    | 10 [6; 14]                          | 0.36 [0.18; 0.54]                            | 8 [4; 13]                           |
| Sarasota       | USA     | 0.24 [0.14; 0.33]                    | 17 [10; 24]                         | 0.16 [0.05; 0.25]                            | 11 [4; 18]                          |
| Steubenville   | USA     | 0.26 [0.16; 0.38]                    | 3 [2; 4]                            | 0.21 [0.11; 0.32]                            | 2 [1; 3]                            |
| Saint Charles  | USA     | 0.45 [0.27; 0.62]                    | 6 [4; 8]                            | 0.38 [0.2; 0.55]                             | 5 [3; 7]                            |
| Stockton       | USA     | 0.25 [0.15; 0.35]                    | 10 [6; 14]                          | 0.19 [0.09; 0.29]                            | 7 [3; 11]                           |
| South bend     | USA     | 0.46 [0.28; 0.64]                    | 11 [6; 15]                          | 0.37 [0.18; 0.55]                            | 9 [4; 13]                           |
| St Louis       | USA     | 0.32 [0.2; 0.44]                     | 48 [29; 66]                         | 0.25 [0.12; 0.38]                            | 37 [18; 56]                         |
| Stamford       | USA     | 0.42 [0.26; 0.59]                    | 29 [18; 40]                         | 0.33 [0.17; 0.5]                             | 23 [11; 34]                         |
| St. Petersburg | USA     | 0.22 [0.13; 0.31]                    | 17 [10; 24]                         | 0.15 [0.06; 0.24]                            | 11 [5; 18]                          |
| State College  | USA     | 0.44 [0.26; 0.61]                    | 4 [2; 5]                            | 0.35 [0.18; 0.53]                            | 3 [2; 5]                            |
| Seattle        | USA     | 0.12 [0.07; 0.16]                    | 13 [8; 17]                          | 0.07 [0.02; 0.12]                            | 7 [2; 13]                           |
| Tacoma         | USA     | 0.11 [0.07; 0.15]                    | 5 [3; 7]                            | 0.05 [0.01; 0.11]                            | 2 [0; 5]                            |
| Tampa          | USA     | 0.25 [0.16; 0.36]                    | 19 [12; 27]                         | 0.18 [0.08; 0.29]                            | 13 [6; 22]                          |

| City        | Country | Total (Above 70 µg/m <sup>3</sup> )* |                                        | Above WHO Guideline (100 µg/m <sup>3</sup> ) |                                        |
|-------------|---------|--------------------------------------|----------------------------------------|----------------------------------------------|----------------------------------------|
|             |         | Excess fraction<br>(%, 95% CI)       | Annual excess<br>deaths<br>(N, 95% CI) | Excess fraction<br>(%, 95% CI)               | Annual excess<br>deaths<br>(N, 95% CI) |
| Tucson      | USA     | 0.29 [0.18; 0.41]                    | 18 [11; 26]                            | 0.19 [0.07; 0.32]                            | 12 [5; 20]                             |
| Tallahassee | USA     | 0.24 [0.15; 0.34]                    | 3 [2; 4]                               | 0.17 [0.06; 0.27]                            | 2 [1; 3]                               |
| Toledo      | USA     | 0.34 [0.19; 0.47]                    | 15 [9; 21]                             | 0.26 [0.11; 0.4]                             | 11 [5; 17]                             |
| Trenton     | USA     | 0.34 [0.21; 0.47]                    | 10 [6; 13]                             | 0.29 [0.15; 0.42]                            | 8 [4; 12]                              |
| Terra Haute | USA     | 0.46 [0.28; 0.64]                    | 5 [3; 7]                               | 0.37 [0.19; 0.57]                            | 4 [2; 6]                               |
| Tulsa       | USA     | 0.34 [0.2; 0.48]                     | 16 [9; 22]                             | 0.27 [0.12; 0.4]                             | 12 [5; 18]                             |
| Visalia     | USA     | 0.6 [0.36; 0.85]                     | 14 [9; 20]                             | 0.56 [0.32; 0.8]                             | 13 [8; 19]                             |
| Vancouver   | USA     | 0.13 [0.08; 0.18]                    | 2 [1; 3]                               | 0.07 [0.01; 0.12]                            | 1 [0; 2]                               |
| Ventura     | USA     | 0.44 [0.27; 0.64]                    | 18 [11; 27]                            | 0.36 [0.18; 0.55]                            | 15 [8; 23]                             |
| Wichita     | USA     | 0.2 [0.12; 0.28]                     | 7 [4; 9]                               | 0.14 [0.06; 0.22]                            | 5 [2; 7]                               |
| Weber       | USA     | 0.62 [0.37; 0.85]                    | 7 [4; 10]                              | 0.53 [0.28; 0.77]                            | 6 [3; 9]                               |
| Wilmington  | USA     | 0.27 [0.16; 0.38]                    | 10 [6; 14]                             | 0.22 [0.11; 0.33]                            | 8 [4; 12]                              |
| Winston     | USA     | 0.53 [0.31; 0.74]                    | 13 [8; 18]                             | 0.45 [0.23; 0.66]                            | 11 [6; 17]                             |
| Worcester   | USA     | 0.31 [0.19; 0.44]                    | 20 [13; 28]                            | 0.23 [0.11; 0.36]                            | 15 [7; 23]                             |
| WDC         | USA     | 0.22 [0.13; 0.31]                    | 15 [9; 21]                             | 0.18 [0.09; 0.28]                            | 12 [6; 19]                             |
| Washington  | USA     | 0.37 [0.22; 0.52]                    | 9 [5; 12]                              | 0.31 [0.16; 0.45]                            | 7 [4; 11]                              |
| Youngstown  | USA     | 0.41 [0.24; 0.57]                    | 17 [10; 24]                            | 0.34 [0.18; 0.51]                            | 14 [7; 21]                             |
| York        | USA     | 0.38 [0.22; 0.52]                    | 11 [7; 16]                             | 0.32 [0.16; 0.46]                            | 9 [5; 14]                              |

**eTable 6.** Overall pooled estimates of ozone-mortality association (lag01) (95% confidence interval (CI)) expressed as relative risk (RR) per 10- $\mu\text{g}/\text{m}^3$  increase in ozone for each of the sensitivity analyses, except for the different approaches to control for temperature (reported in eFigure 3). Details on the analytical approach of each sub-analysis reported in eMethods 2.

|                                                               | N<br>locations | RR [95% CI]             |
|---------------------------------------------------------------|----------------|-------------------------|
| <i>Main analysis</i>                                          | 406            | 1.0018 [1.0012; 1.0024] |
| Time control with 4 df                                        | 406            | 1.0019 [1.0011; 1.0026] |
| Time control with 10 df                                       | 406            | 1.0017 [1.0012; 1.0023] |
| Main analysis<br>(restricted to PM <sub>10</sub> locations)   | 228            | 1.0017 [1.0010; 1.0024] |
| Control for PM <sub>10</sub><br>(24-h average – linear lag01) | 228            | 1.0015 [1.0007; 1.0024] |
| Main analysis<br>(restricted to NO <sub>2</sub> locations)    | 269            | 1.0015 [1.0010; 1.0019] |
| Control for NO <sub>2</sub><br>(24-h average – linear lag01)  | 269            | 1.0014 [1.0010; 1.0019] |
| Main analysis<br>(restricted to NO <sub>2</sub> locations)    | 89             | 1.0011 [0.9999; 1.0024] |
| Control for NO <sub>2</sub><br>(24-h average – linear lag01)  | 89             | 1.0007 [0.9994; 1.002]  |
| Main analysis<br>(restricted to locations with rel humidity)  | 317            | 1.0020 [1.0013; 1.0026] |
| Control for relative humidity<br>(24-h average – linear lag0) | 317            | 1.0026 [1.0017; 1.0035] |
| Restriction to all-year series                                | 309            | 1.0018 [1.0012; 1.0024] |

\*df: degrees of freedom. qAIC df7 (main model): 10376950. qAIC df4 (sensitivity analysis 1): 10378178. qAIC df10 (sensitivity analysis 2): 10389530.



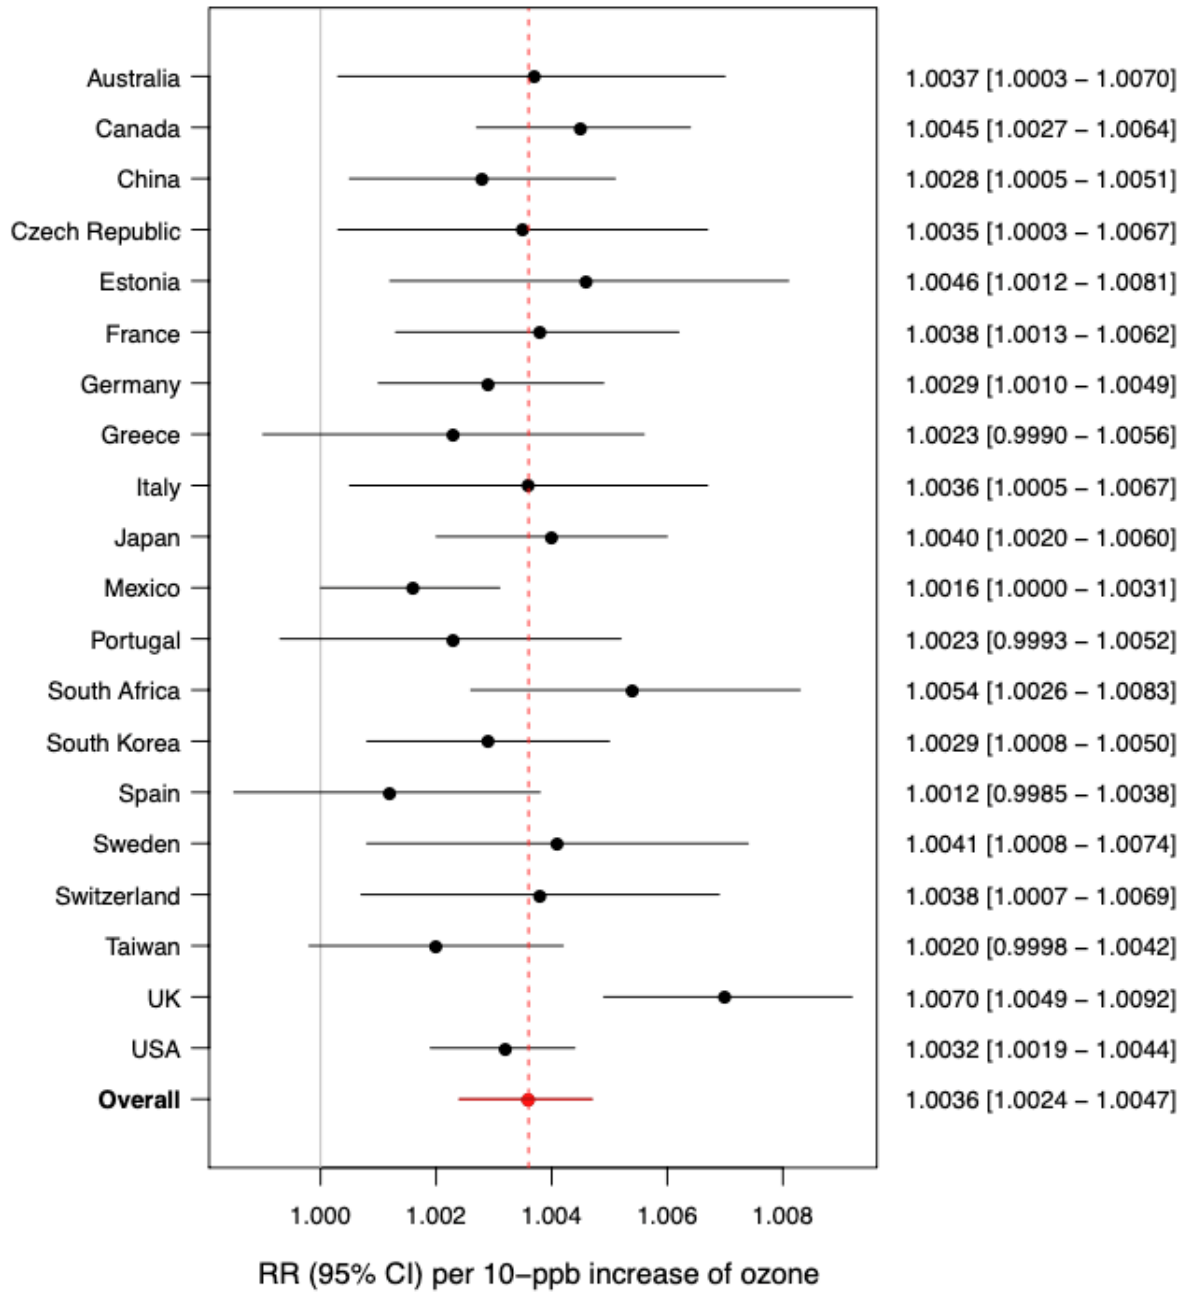

**eFigure 1.** Overall and country-specific short-term ozone-mortality association, expressed as relative risk (RR) per 10-ppb increase in ozone (maximum 8-hour average) (lag 01).

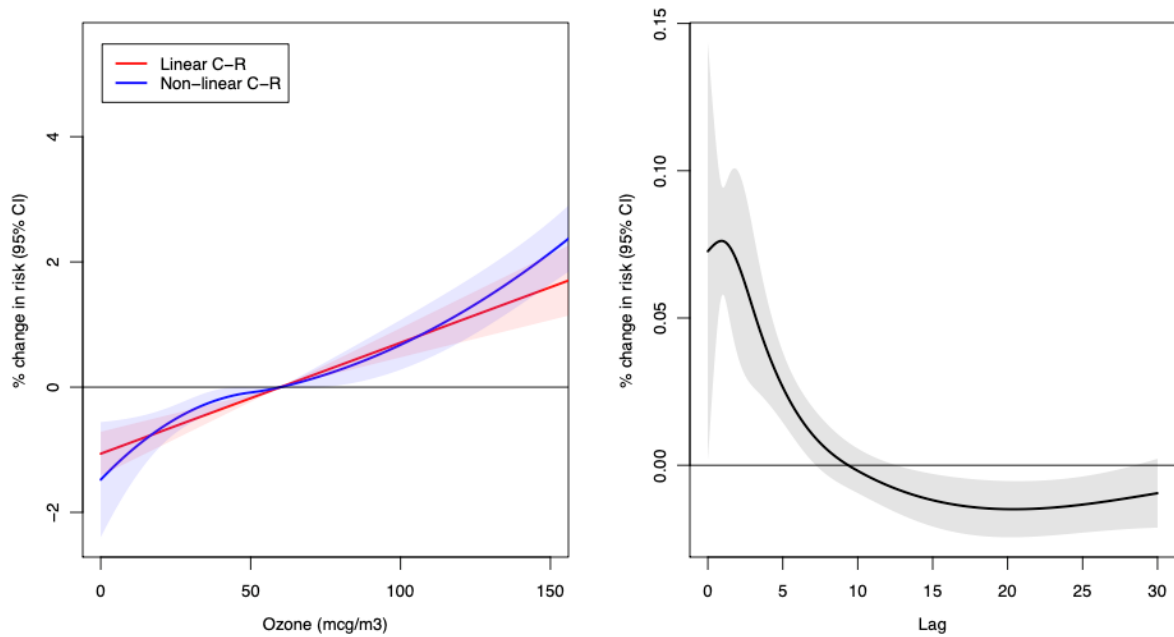

**eFigure 2.** Results from the additional analyses. Comparison of the average concentration-response (C-R) shapes using linear and non-linear functions (left) and lag-response association up to 30 days (right) per 10-unit increase in ozone. q-AIC linear: 10376950, Q-AIC non-linear: 10379020.

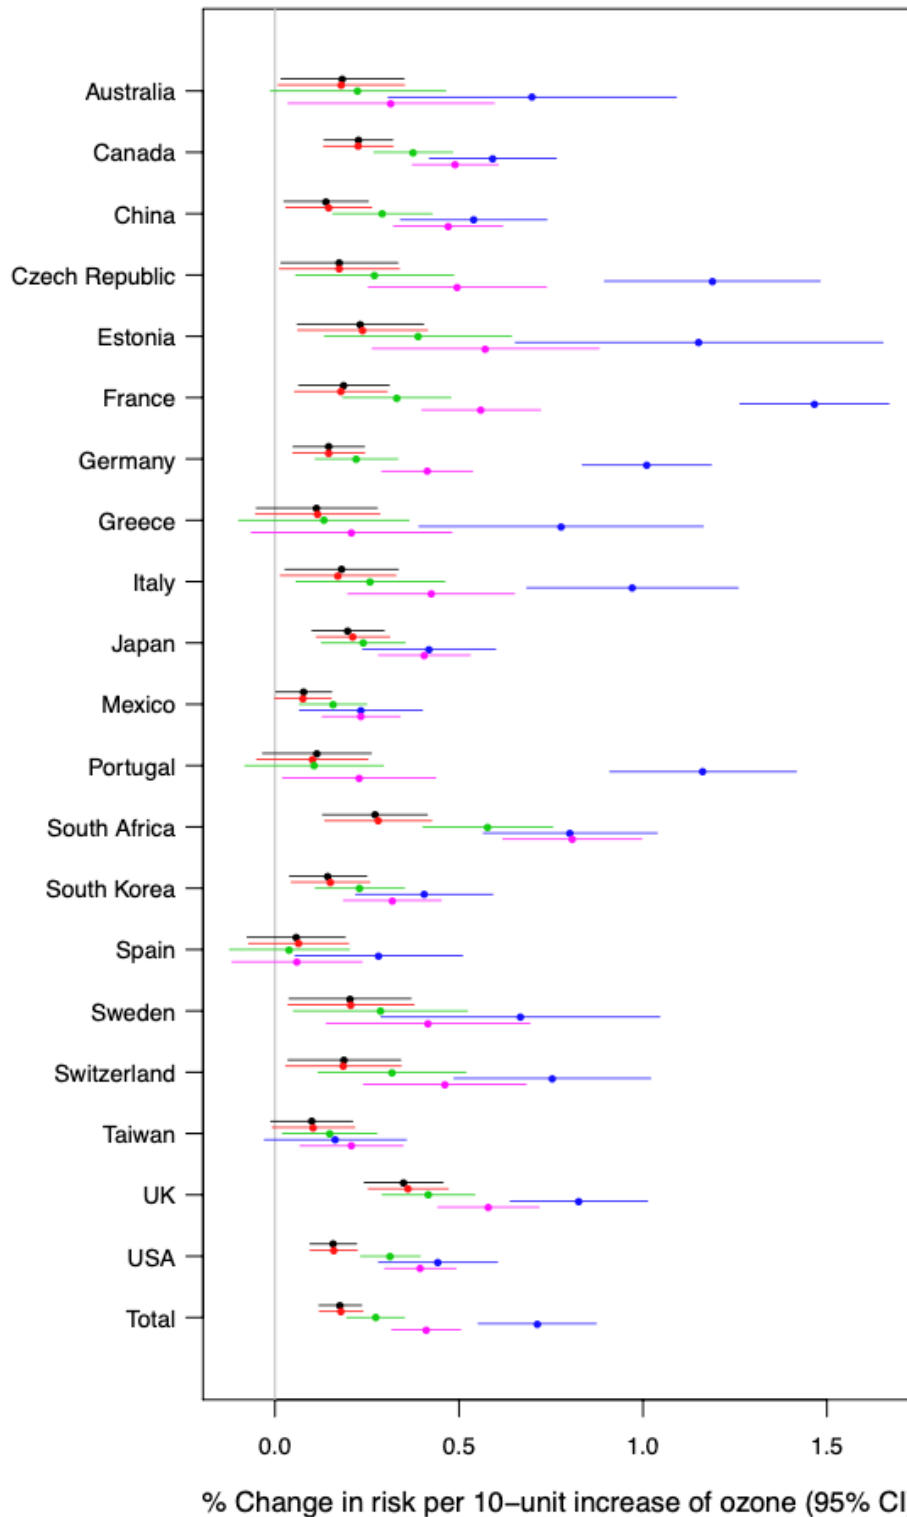

**eFigure 3.** Overall and country-specific short-term ozone-mortality association, expressed as relative risk (RR) per 10-unit increase in ozone, using different control for temperature (details on the modelling in eMethods2). (Black, main model (qAIC: 10376950); red, approach 1 (qAIC: 10377749); green, approach 2 (qAIC: 10380318); blue, approach 3 (qAIC: 10389132); pink, approach 4 (qAIC: 10387640)).
